# Supplementary material for: Analysis of epidemic trend of respiratory pathogens in children after long-term pathogen isolation
Source: PeerJ. 2025 Jul 16;13:e19710. doi: 10.7717/peerj.19710 (PMC12275896; doi:10.7717/peerj.19710)
Supplement: Supplemental Information 1 [file peerj-13-19710-s001.xlsx]

## Sheet: Sheet1
PATIENT_SEX	SAMPLE_CLASS_NAME	AGE_INPUT	CLINICAL_DIAGNOSES	TEST_ORDER_NAME	REQUISITION_TIME	BLOODTYPE_ABO	BLOODTYPE_RH	ESPECIAL_CONDITION	INFECT_STATUS	SAMPLE_STATUS	SAMPLING_POSITION	DELIVER_HOSPITAL	ID_CARD	IFV-A	IFV-A	IFV-B	IFV-B	RSV	RSV	HAdV	HAdV	HRV	HRV	MP	MP	PA	PA	KP	KP	SA	SA	HI	HI	LP	LP	SP	SP
female	Throat swab	10year	fever	Respiratory pathogens nucleic acid six										Negative		Negative		Negative		positive	↑	Negative		Negative
male	Throat swab	3year11month	Acute bronchitis	Respiratory pathogens nucleic acid six	2023/10/1 0:24:00									Negative		Negative		Negative		positive	↑	Negative		Negative
male	Throat swab	4month	pneumonia	Respiratory pathogens nucleic acid six	2023/10/1 10:33:00									Negative		Negative		Negative		Negative		Negative		positive	↑
male	Throat swab	1year11month	Acute bronchitis	Respiratory pathogens nucleic acid six	2023/10/1 10:37:00									Negative		Negative		Negative		Negative		positive	↑	Negative
male	sputum	5month25day	pneumonia	Respiratory bacterial nucleic acid six	2023/10/1 11:57:00																					Negative(-)		positive(+）	↑	Negative(-)		positive(+）	↑	Negative(-)		Negative(-)
male	Throat swab	5month25day	pneumonia	Respiratory pathogens nucleic acid six	2023/10/1 11:57:00									Negative		Negative		Negative		Negative		Negative		Negative
female	Throat swab	3month9day	Acute bronchitis	Respiratory pathogens nucleic acid six	2023/10/1 12:00:00									Negative		Negative		Negative		Negative		Negative		Negative
male	sputum	9month17day	Acute laryngitis	Respiratory bacterial nucleic acid six	2023/10/1 12:16:00																					Negative(-)		Negative(-)		Negative(-)		positive(+）	↑	Negative(-)		positive(+）	↑
male	Throat swab	9month17day	Acute laryngitis	Respiratory pathogens nucleic acid six	2023/10/1 12:16:00									Negative		Negative		Negative		Negative		positive	↑	Negative
male	Throat swab	2year1month	Unexplained convulsion	Respiratory pathogens nucleic acid six	2023/10/1 13:26:00									Negative		Negative		Negative		Negative		positive	↑	Negative
male	Throat swab	7year6month	Lobarpneumonia	Respiratory pathogens nucleic acid six	2023/10/1 16:06:00									Negative		Negative		Negative		Negative		Negative		positive	↑
male	sputum	9year6month	Lobarpneumonia	Respiratory bacterial nucleic acid six	2023/10/1 16:42:00																					Negative(-)		positive(+）	↑	Negative(-)		positive(+）	↑	Negative(-)		Negative(-)
male	Throat swab	9year6month	Lobarpneumonia	Respiratory pathogens nucleic acid six	2023/10/1 16:42:00									Negative		Negative		Negative		Negative		Negative		Negative
male	Throat swab	5year	Unexplained convulsion	Respiratory pathogens nucleic acid six	2023/10/1 16:59:00									Negative		Negative		Negative		Negative		Negative		Negative
female	Throat swab	3year10month	Acute bronchitis	Respiratory pathogens nucleic acid six	2023/10/1 17:22:00									Negative		Negative		Negative		positive	↑	positive	↑	Negative
female	Throat swab	3year2month	Unexplained convulsion	Respiratory pathogens nucleic acid six	2023/10/1 18:21:00									Negative		Negative		Negative		Negative		Negative		Negative
male	sputum	1year2month	acuteAsthmatic bronchus	Respiratory bacterial nucleic acid six	2023/10/1 20:12:00																					Negative(-)		Negative(-)		Negative(-)		positive(+）	↑	Negative(-)		positive(+）	↑
male	Throat swab	1year2month	acuteAsthmatic bronchus	Respiratory pathogens nucleic acid six	2023/10/1 20:12:00									Negative		Negative		positive	↑	Negative		positive	↑	Negative
male	Throat swab	2year2month	fever	Respiratory pathogens nucleic acid six	2023/10/1 20:22:00									Negative		Negative		Negative		Negative		Negative		Negative
male	Throat swab	5year1month	fever	Respiratory pathogens nucleic acid six	2023/10/1 7:02:00									Negative		Negative		Negative		Negative		Negative		Negative
male	Throat swab	4year5month	fever	Respiratory pathogens nucleic acid six	2023/10/10 10:08:00									Negative		Negative		Negative		Negative		Negative		Negative
male	Throat swab	8year6month	Acute bronchitis	Respiratory pathogens nucleic acid six	2023/10/10 10:15:00									Negative		Negative		Negative		Negative		Negative		positive(+)	↑
male	Throat swab	3year10month	pneumonia	Respiratory pathogens nucleic acid six	2023/10/10 10:26:00									Negative		Negative		Negative		positive	↑	Negative		Negative
male	sputum	8year6month	Acute bronchitis	Respiratory bacterial nucleic acid six	2023/10/10 11:11:00																					Negative(-)		Negative(-)		Negative(-)		positive(+）	↑	Negative(-)		positive(+）	↑
female	Throat swab	6year11month	fever	Respiratory pathogens nucleic acid six	2023/10/10 11:17:00									Negative		Negative		Negative		Negative		Negative		positive	↑
female	Throat swab	7month23day	Acute laryngotracheitis	Respiratory pathogens nucleic acid six	2023/10/10 11:39:00									Negative		Negative		Negative		Negative		Negative		Negative
male	Throat swab	3year4month	Unexplained convulsion	Respiratory pathogens nucleic acid six	2023/10/10 12:09:00									Negative		Negative		Negative		Negative		Negative		Negative
male	Throat swab	3year6month	Acute bronchitis	Respiratory pathogens nucleic acid six	2023/10/10 14:41:00									Negative		Negative		Negative		Negative		Negative		Negative
male	Throat swab	18day16hour	newborn哭闹	Respiratory pathogens nucleic acid six	2023/10/10 15:39:00									Negative		Negative		Negative		Negative		Negative		Negative
male	Throat swab	2month27day	Acute bronchitis	Respiratory pathogens nucleic acid six	2023/10/10 17:13:00									Negative		Negative		Negative		Negative		positive	↑	Negative
female	Throat swab	2year5month	Unexplained convulsion	Respiratory pathogens nucleic acid six	2023/10/10 17:18:00									Negative		Negative		Negative		Negative		Negative		Negative
female	Throat swab	9day20hour	newbornpneumonia	Respiratory pathogens nucleic acid six	2023/10/10 17:37:00									Negative		Negative		positive	↑	Negative		Negative		Negative
female	Throat swab	6year1month	pneumonia	Respiratory pathogens nucleic acid six	2023/10/10 20:23:00									Negative		Negative		Negative		Negative		positive	↑	positive	↑
male	sputum	2year3month	pneumonia	Respiratory bacterial nucleic acid six	2023/10/10 21:14:00																					Negative(-)		Negative(-)		Negative(-)		positive(+）	↑	Negative(-)		positive(+）	↑
male	Throat swab	2year3month	pneumonia	Respiratory pathogens nucleic acid six	2023/10/10 21:14:00									Negative		Negative		positive	↑	Negative		Negative		Negative
female	Throat swab	11month17day	Acute laryngitis	Respiratory pathogens nucleic acid six	2023/10/10 21:26:00									Negative		Negative		Negative		Negative		Negative		Negative
female	Throat swab	3year	Acute bronchitis	Respiratory pathogens nucleic acid six	2023/10/10 21:31:00									Negative		Negative		positive	↑	Negative		Negative		Negative
male	Throat swab	1year5month	Acute laryngitis	Respiratory pathogens nucleic acid six	2023/10/10 22:55:00									Negative		Negative		Negative		Negative		positive	↑	Negative
male	Throat swab	2year2month	Unexplained convulsion	Respiratory pathogens nucleic acid six	2023/10/10 23:06:00									Negative		Negative		Negative		Negative		Negative		Negative
female	Throat swab	2year10month	Unexplained convulsion	Respiratory pathogens nucleic acid six	2023/10/10 23:16:00									Negative		Negative		Negative		Negative		Negative		Negative
male	sputum	3year5month	fever	Respiratory bacterial nucleic acid six	2023/10/10 23:23:00																					Negative(-)		Negative(-)		Negative(-)		positive(+）	↑	Negative(-)		positive(+）	↑
male	Throat swab	3year5month	fever	Respiratory pathogens nucleic acid six	2023/10/10 23:23:00									Negative		Negative		positive	↑	Negative		Negative		Negative
male	Throat swab	3year3month	pneumonia	Respiratory pathogens nucleic acid six	2023/10/10 4:44:00									Negative		Negative		Negative		Negative		positive	↑	positive	↑
female	sputum	1year10month	pneumonia	Respiratory bacterial nucleic acid six	2023/10/10 8:05:00																					Negative(-)		Negative(-)		Negative(-)		Negative(-)		Negative(-)		Negative(-)
female	Throat swab	9month2day	bronchuspneumonia	Respiratory pathogens nucleic acid six	2023/10/10 8:31:00									Negative		Negative		Negative		Negative		Negative		Negative
male	sputum	10month12day	acuteAsthmatic bronchus	Respiratory bacterial nucleic acid six	2023/10/10 8:42:00																					Negative(-)		Negative(-)		Negative(-)		positive(+）	↑	Negative(-)		positive(+）	↑
male	Throat swab	2year11month	Acute upper respiratory tract infection	Respiratory pathogens nucleic acid six	2023/10/10 9:04:00									Negative		Negative		Negative		Negative		Negative		Negative
female	sputum	3year3month	pneumonia	Respiratory bacterial nucleic acid six	2023/10/10 9:04:00																					Negative(-)		Negative(-)		Negative(-)		Negative(-)		Negative(-)		Negative(-)
male	Throat swab	4month10day	Acute bronchitis	Respiratory pathogens nucleic acid six	2023/10/10 9:42:00									Negative		Negative		Negative		Negative		Negative		Negative
female	Throat swab	12year	Routine health checks for children	Respiratory pathogens nucleic acid six	2023/10/11 10:06:00									Negative		Negative		Negative		Negative		Negative		Negative
male	sputum	13year	pneumonia，其他的 病原体未特指的	Respiratory bacterial nucleic acid six	2023/10/11 10:22:00																					Negative(-)		Negative(-)		Negative(-)		Negative(-)		Negative(-)		positive(+）	↑
male	Throat swab	13year	pneumonia，其他的 病原体未特指的	Respiratory pathogens nucleic acid six	2023/10/11 10:22:00									Negative		Negative		Negative		Negative		Negative		positive	↑
male	Throat swab	2year10month	Acute upper respiratory tract infection	Respiratory pathogens nucleic acid six	2023/10/11 10:42:00									Negative		Negative		Negative		Negative		Negative		Negative
female	Throat swab	9month5day	fever	Respiratory pathogens nucleic acid six	2023/10/11 11:10:00									Negative		Negative		Negative		Negative		Negative		Negative
male	Throat swab	11month18day	Acute upper respiratory tract infection	Respiratory pathogens nucleic acid six	2023/10/11 11:11:00									Negative		Negative		Negative		Negative		Negative		Negative
male	Throat swab	1year1month	Asthmatic bronchuspneumonia	Respiratory pathogens nucleic acid six	2023/10/11 12:43:00									Negative		Negative		positive	↑	Negative		positive	↑	Negative
male	Throat swab	1year11month	pneumonia	Respiratory pathogens nucleic acid six	2023/10/11 13:12:00									Negative		Negative		Negative		Negative		Negative		Negative
female	sputum	5year7month	Asthmatic bronchuspneumonia	Respiratory bacterial nucleic acid six	2023/10/11 14:59:00																					Negative(-)		Negative(-)		Negative(-)		Negative(-)		Negative(-)		positive(+）	↑
female	Throat swab	5year7month	Asthmatic bronchuspneumonia	Respiratory pathogens nucleic acid six	2023/10/11 14:59:00									Negative		Negative		Negative		Negative		positive	↑	Negative
female	Throat swab	7month14day	Acute upper respiratory tract infection	Respiratory pathogens nucleic acid six	2023/10/11 15:16:00								620502202302251325	Negative		Negative		Negative		Negative		positive	↑	Negative
male	Throat swab	8year7month	pneumonia	Respiratory pathogens nucleic acid six	2023/10/11 15:48:00									Negative		Negative		Negative		Negative		Negative		positive	↑
female	sputum	10year5month	pneumonia	Respiratory bacterial nucleic acid six	2023/10/11 17:51:00																					Negative(-)		Negative(-)		Negative(-)		Negative(-)		Negative(-)		positive(+）	↑
female	Throat swab	10year5month	pneumonia	Respiratory pathogens nucleic acid six	2023/10/11 17:51:00									Negative		Negative		Negative		Negative		Negative		positive	↑
male	Throat swab	4year6month	Acute laryngitis	Respiratory pathogens nucleic acid six	2023/10/11 2:25:00									Negative		Negative		Negative		Negative		Negative		Negative
male	Throat swab	9year3month	bronchuspneumonia	Respiratory pathogens nucleic acid six	2023/10/11 21:40:00									Negative		Negative		Negative		Negative		Negative		positive	↑
male	sputum	9year3month	bronchuspneumonia	Respiratory bacterial nucleic acid six	2023/10/11 21:49:00																					Negative(-)		Negative(-)		Negative(-)		Negative(-)		Negative(-)		Negative(-)
female	Throat swab	8month8day	Acute laryngitis	Respiratory pathogens nucleic acid six	2023/10/11 21:56:00									Negative		Negative		Negative		Negative		Negative		Negative
male	Throat swab	1year10month	pneumonia	Respiratory pathogens nucleic acid six	2023/10/11 22:44:00									Negative		Negative		Negative		Negative		Negative		Negative
male	Throat swab	1year9month	Acute upper respiratory tract infection	Respiratory pathogens nucleic acid six	2023/10/11 23:22:00									Negative		Negative		Negative		Negative		positive	↑	Negative
male	Throat swab	3year11month	Acute upper respiratory tract infection	Respiratory pathogens nucleic acid six	2023/10/11 6:24:00									Negative		Negative		Negative		Negative		Negative		Negative
male	Throat swab	8month16day	fever	Respiratory pathogens nucleic acid six	2023/10/11 7:44:00									Negative		Negative		Negative		Negative		positive	↑	Negative
male	Throat swab	6year	Acute bronchitis	Respiratory pathogens nucleic acid six	2023/10/11 9:04:00								620522201709270019	Negative		Negative		Negative		Negative		Negative		positive	↑
female	Throat swab	7year3month	Acute upper respiratory tract infection	Respiratory pathogens nucleic acid six	2023/10/11 9:43:00									Negative		Negative		Negative		Negative		Negative		Negative
female	Throat swab	11month8day	Acute laryngitis	Respiratory pathogens nucleic acid six	2023/10/12 1:43:00									Negative		Negative		Negative		Negative		positive	↑	Negative
male	Throat swab	3year1month	Acute bronchitis	Respiratory pathogens nucleic acid six	2023/10/12 10:00:00									Negative		Negative		Negative		Negative		Negative		Negative
male	Throat swab	4year6month	Unexplained convulsion	Respiratory pathogens nucleic acid six	2023/10/12 11:46:00									Negative		Negative		Negative		Negative		positive	↑	Negative
male	sputum	1year	pneumonia	Respiratory bacterial nucleic acid six	2023/10/12 11:55:00																					Negative(-)		Negative(-)		Negative(-)		Negative(-)		Negative(-)		positive(+）	↑
male	Throat swab	1year	pneumonia	Respiratory pathogens nucleic acid six	2023/10/12 11:55:00									Negative		Negative		positive	↑	Negative		Negative		Negative
male	Throat swab	6year9month	tonsillitis	Respiratory pathogens nucleic acid six	2023/10/12 12:14:00									Negative		Negative		Negative		Negative		Negative		Negative
male	sputum	1year8month	bronchuspneumonia	Respiratory bacterial nucleic acid six	2023/10/12 12:19:00																					Negative(-)		Negative(-)		Negative(-)		Negative(-)		Negative(-)		positive(+）	↑
male	Throat swab	1year8month	bronchuspneumonia	Respiratory pathogens nucleic acid six	2023/10/12 12:19:00									Negative		Negative		Negative		Negative		positive	↑	Negative
male	Throat swab	8year6month	Acute bronchitis	Respiratory pathogens nucleic acid six	2023/10/12 12:28:00									Negative		Negative		Negative		Negative		Negative		positive	↑
female	Throat swab	2year10month	fever	Respiratory pathogens nucleic acid six	2023/10/12 15:27:00									Negative		Negative		Negative		Negative		Negative		Negative
female	Throat swab	9month24day	Acute upper respiratory tract infection	Respiratory pathogens nucleic acid six	2023/10/12 15:47:00									Negative		Negative		Negative		Negative		Negative		Negative
male	Throat swab	5year8month	fever	Respiratory pathogens nucleic acid six	2023/10/12 17:35:00									Negative		Negative		Negative		Negative		positive	↑	Negative
female	Throat swab	2year1month	Acute upper respiratory tract infection	Respiratory pathogens nucleic acid six	2023/10/12 18:31:00									Negative		Negative		Negative		Negative		Negative		Negative
male	Throat swab	2year3month	Febrile convulsion	Respiratory pathogens nucleic acid six	2023/10/12 20:58:00									Negative		Negative		Negative		Negative		Negative		Negative
female	Throat swab	10month17day	acuteAsthmatic bronchus	Respiratory pathogens nucleic acid six	2023/10/12 5:16:00									Negative		Negative		Negative		Negative		Negative		Negative
female	sputum	10month17day	pneumonia	Respiratory bacterial nucleic acid six	2023/10/12 5:16:00																					Negative(-)		Negative(-)		Negative(-)		Negative(-)		Negative(-)		positive(+）	↑
female	sputum	9day20hour	newbornpneumonia	Respiratory bacterial nucleic acid six	2023/10/12 8:44:00																					Negative(-)		Negative(-)		Negative(-)		Negative(-)		Negative(-)		Negative(-)
male	Throat swab	2year3month	Acute bronchitis	Respiratory pathogens nucleic acid six	2023/10/12 9:28:00									Negative(-)		Negative(-)		Negative(-)		Negative(-)		positive(+）	↑	Negative(-)
male	sputum	7year2month	fever	Respiratory bacterial nucleic acid six	2023/10/13 10:24:00																					Negative(-)		Negative(-)		Negative(-)		positive(+）	↑	Negative(-)		positive(+）	↑
male	Throat swab	7year2month	fever	Respiratory pathogens nucleic acid six	2023/10/13 10:24:00									Negative		Negative		Negative		Negative		Negative		positive	↑
male	sputum	4month29day	pneumonia	Respiratory bacterial nucleic acid six	2023/10/13 11:00:00																					Negative(-)		Negative(-)		Negative(-)		positive(+）	↑	Negative(-)		positive(+）	↑
male	Throat swab	4month29day	pneumonia	Respiratory pathogens nucleic acid six	2023/10/13 11:00:00									Negative		Negative		Negative		Negative		positive	↑	Negative
male	Throat swab	3year11month	acutetonsillitis	Respiratory pathogens nucleic acid six	2023/10/13 11:30:00									Negative		Negative		Negative		Negative		Negative		Negative
male	sputum	6month9day	acuteAsthmatic bronchus	Respiratory bacterial nucleic acid six	2023/10/13 11:34:00																					Negative(-)		Negative(-)		Negative(-)		Negative(-)		Negative(-)		Negative(-)
male	Throat swab	6month9day	acuteAsthmatic bronchus	Respiratory pathogens nucleic acid six	2023/10/13 11:34:00									Negative		Negative		Negative		Negative		Negative		Negative
male	Throat swab	6year8month	Acute bronchitis	Respiratory pathogens nucleic acid six	2023/10/13 11:41:00									Negative		Negative		Negative		Negative		Negative		positive	↑
female	Throat swab	1year3month	Acute laryngitis	Respiratory pathogens nucleic acid six	2023/10/13 13:47:00									Negative		Negative		Negative		Negative		Negative		Negative
female	Throat swab	1year2month	Unexplained convulsion	Respiratory pathogens nucleic acid six	2023/10/13 13:58:00									Negative		Negative		positive	↑	Negative(-)		Negative		Negative
female	Throat swab	3year5month	pneumonia	Respiratory pathogens nucleic acid six	2023/10/13 14:08:00									Negative		Negative		positive	↑	Negative		Negative		Negative
female	Throat swab	3month28day	pneumonia	Respiratory pathogens nucleic acid six	2023/10/13 16:50:00									Negative		Negative		Negative		Negative		Negative		Negative
female	Throat swab	3year9month	fever	Respiratory pathogens nucleic acid six	2023/10/13 18:14:00									Negative		Negative		Negative		positive	↑	Negative		Negative
male	Throat swab	6year1month	Acute upper respiratory tract infection	Respiratory pathogens nucleic acid six	2023/10/13 18:27:00									Negative		Negative		Negative		Negative		Negative		Negative
male	sputum	1year	acuteAsthmatic bronchus	Respiratory bacterial nucleic acid six	2023/10/13 18:42:00																					Negative(-)		Negative(-)		Negative(-)		positive(+）	↑	Negative(-)		positive(+）	↑
male	Throat swab	1year	acuteAsthmatic bronchus	Respiratory pathogens nucleic acid six	2023/10/13 18:42:00									Negative		Negative		Negative		Negative		Negative		Negative
female	Throat swab	6year5month	pneumonia	Respiratory pathogens nucleic acid six	2023/10/13 19:00:00									Negative		Negative		Negative		Negative		Negative		Negative
male	sputum	1year7month	Acute laryngitis	Respiratory bacterial nucleic acid six	2023/10/13 19:39:00																					Negative(-)		Negative(-)		Negative(-)		Negative(-)		Negative(-)		positive(+）	↑
male	Throat swab	1year7month	Acute laryngitis	Respiratory pathogens nucleic acid six	2023/10/13 19:39:00									Negative		Negative		Negative		Negative		Negative		Negative
male	Throat swab	3year9month	Acute bronchitis	Respiratory pathogens nucleic acid six	2023/10/13 19:53:00									Negative		Negative		Negative		Negative		Negative		positive	↑
male	Throat swab	8year8month	fever	Respiratory pathogens nucleic acid six	2023/10/13 19:53:00									Negative		Negative		Negative		positive	↑	Negative		Negative
female	sputum	3year7month	Acute bronchitis	Respiratory bacterial nucleic acid six	2023/10/13 2:13:00																					Negative(-)		Negative(-)		Negative(-)		positive(+）	↑	Negative(-)		positive(+）	↑
female	Throat swab	3year7month	Acute bronchitis	Respiratory pathogens nucleic acid six	2023/10/13 2:13:00									positive	↑	Negative		Negative		Negative		Negative		Negative
male	sputum	2year2month	Acute bronchitis	Respiratory bacterial nucleic acid six	2023/10/13 21:08:00																					Negative(-)		Negative(-)		Negative(-)		Negative(-)		Negative(-)		positive(+）	↑
male	Throat swab	2year2month	Acute bronchitis	Respiratory pathogens nucleic acid six	2023/10/13 21:08:00									Negative		Negative		Negative		Negative(-)		positive	↑	Negative
male	sputum	5month27day	acuteAsthmatic bronchus	Respiratory bacterial nucleic acid six	2023/10/13 21:31:00																					Negative(-)		Negative(-)		positive(+）	↑	Negative(-)		Negative(-)		Negative(-)
male	Throat swab	5month27day	acuteAsthmatic bronchus	Respiratory pathogens nucleic acid six	2023/10/13 21:31:00									Negative		Negative		Negative		Negative		Negative		Negative
male	Throat swab	6year5month	Laryngeal obstruction	Respiratory pathogens nucleic acid six	2023/10/13 21:57:00									Negative		Negative		Negative		positive	↑	Negative		Negative
male	Throat swab	1year	pneumonia	Respiratory pathogens nucleic acid six	2023/10/13 22:05:00									Negative		Negative		positive	↑	Negative		Negative		Negative
female	sputum	3year3month	Acute bronchitis	Respiratory bacterial nucleic acid six	2023/10/13 23:49:00																					Negative(-)		Negative(-)		Negative(-)		positive(+）	↑	Negative(-)		Negative(-)
female	Throat swab	3year3month	Acute bronchitis	Respiratory pathogens nucleic acid six	2023/10/13 23:49:00									Negative		Negative		positive	↑	Negative		Negative		Negative
male	Throat swab	1year5month	Febrile convulsion	Respiratory pathogens nucleic acid six	2023/10/13 7:24:00									Negative		Negative		Negative		Negative		Negative		Negative
female	Throat swab	7year3month	Acute bronchitis	Respiratory pathogens nucleic acid six	2023/10/13 8:11:00									Negative		Negative		Negative		Negative		Negative		Negative
female	Throat swab	4year1month	Unexplained convulsion	Respiratory pathogens nucleic acid six	2023/10/14 11:47:00									Negative(-)		Negative(-)		Negative(-)		Negative(-)		Negative(-)		Negative(-)
male	sputum	19day2hour	congenitalpneumonia	Respiratory bacterial nucleic acid six	2023/10/14 11:53:00																					Negative(-)		Negative(-)		Negative(-)		Negative(-)		Negative(-)		Negative(-)
male	Throat swab	19day2hour	congenitalpneumonia	Respiratory pathogens nucleic acid six	2023/10/14 11:53:00									Negative		Negative		Negative		Negative		Negative		Negative
male	Throat swab	1year1month	Febrile convulsion	Respiratory pathogens nucleic acid six	2023/10/14 12:09:00									Negative(-)		Negative(-)		Negative(-)		Negative(-)		Negative(-)		Negative(-)
male	Throat swab	8year5month	fever	Respiratory pathogens nucleic acid six	2023/10/14 12:28:00									Negative(-)		Negative(-)		Negative(-)		Negative(-)		Negative(-)		Negative(-)
female	Throat swab	11month1day	Asthmatic bronchuspneumonia	Respiratory pathogens nucleic acid six	2023/10/14 12:29:00									Negative(-)		Negative(-)		positive(+）	↑	Negative(-)		Negative(-)		Negative(-)
male	Throat swab	1year6month	Acute bronchitis	Respiratory pathogens nucleic acid six	2023/10/14 12:45:00									Negative(-)		Negative(-)		Negative(-)		Negative(-)		Negative(-)		Negative(-)
female	Throat swab	3year11month	Infantile diarrhea	Respiratory pathogens nucleic acid six	2023/10/14 13:06:00									Negative(-)		Negative(-)		Negative(-)		Negative(-)		Negative(-)		Negative(-)
male	sputum	4year	Acute bronchitis	Respiratory bacterial nucleic acid six	2023/10/14 13:19:00																					Negative(-)		Negative(-)		Negative(-)		positive(+）	↑	Negative(-)		positive(+）	↑
male	Throat swab	4year	Acute bronchitis	Respiratory pathogens nucleic acid six	2023/10/14 13:19:00									Negative(-)		Negative(-)		Negative(-)		Negative(-)		Negative(-)		Negative(-)
male	Throat swab	5year10month	fever	Respiratory pathogens nucleic acid six	2023/10/14 13:29:00									Negative(-)		Negative(-)		Negative(-)		Negative(-)		Negative(-)		Negative(-)
male	Throat swab	7year11month	Acute bronchitis	Respiratory pathogens nucleic acid six	2023/10/14 13:32:00									Negative(-)		Negative(-)		Negative(-)		Negative(-)		positive(+）	↑	Negative(-)
male	Throat swab	7year6month	Acute upper respiratory tract infection	Respiratory pathogens nucleic acid six	2023/10/14 14:31:00									Negative(-)		Negative(-)		Negative(-)		positive(+）	↑	Negative(-)		Negative(-)
male	Throat swab	1month9day	Acute upper respiratory tract infection	Respiratory pathogens nucleic acid six	2023/10/14 15:21:00									Negative(-)		Negative(-)		Negative(-)		Negative(-)		Negative(-)		Negative(-)
male	Throat swab	6year1month	pneumonia	Respiratory pathogens nucleic acid six	2023/10/14 15:39:00									Negative(-)		Negative(-)		Negative(-)		Negative(-)		Negative(-)		positive(+)	↑
male	Throat swab	4year	Acute upper respiratory tract infection	Respiratory pathogens nucleic acid six	2023/10/14 16:06:00									Negative(-)		Negative(-)		Negative(-)		Negative(-)		Negative(-)		Negative(-)
female	Throat swab	3year6month	pneumonia	Respiratory pathogens nucleic acid six	2023/10/14 16:37:00									Negative(-)		Negative(-)		Negative(-)		Negative(-)		Negative(-)		Negative(-)
male	Throat swab	10month21day	Acute bronchitis	Respiratory pathogens nucleic acid six	2023/10/14 18:38:00									Negative(-)		Negative(-)		Negative(-)		Negative(-)		Negative(-)		Negative(-)
male	sputum	10month22day	Acute bronchitis	Respiratory bacterial nucleic acid six	2023/10/14 18:49:00																					Negative(-)		Negative(-)		Negative(-)		positive(+）	↑	Negative(-)		positive(+）	↑
female	sputum	3year9month	pneumonia	Respiratory bacterial nucleic acid six	2023/10/14 19:36:00																					Negative(-)		Negative(-)		Negative(-)		positive(+）	↑	Negative(-)		positive(+）	↑
male	Throat swab	1year	Acute upper respiratory tract infection	Respiratory pathogens nucleic acid six	2023/10/14 20:01:00									Negative(-)		Negative(-)		Negative(-)		Negative(-)		positive(+）	↑	Negative(-)
male	Throat swab	7year2month	pneumonia	Respiratory pathogens nucleic acid six	2023/10/14 20:28:00									Negative(-)		Negative(-)		Negative(-)		Negative(-)		positive(+）	↑	positive(+)	↑
male	sputum	9month8day	pneumonia	Respiratory bacterial nucleic acid six	2023/10/14 21:09:00																					positive(+）	↑	Negative(-)		Negative(-)		Negative(-)		Negative(-)		Negative(-)
male	Throat swab	9month8day	pneumonia	Respiratory pathogens nucleic acid six	2023/10/14 21:09:00									Negative(-)		Negative(-)		Negative(-)		Negative(-)		Negative(-)		Negative(-)
male	Throat swab	4year	Acute laryngitis	Respiratory pathogens nucleic acid six	2023/10/14 3:43:00									Negative		Negative		Negative		Negative		positive	↑	Negative
male	Throat swab	17day23hour	newbornfever	Respiratory pathogens nucleic acid six	2023/10/14 7:22:00									Negative		Negative		positive	↑	Negative		Negative		Negative
male	Throat swab	3year9month	Acute bronchitis	Respiratory pathogens nucleic acid six	2023/10/15 0:01:00									Negative(-)		Negative(-)		Negative(-)		Negative(-)		Negative(-)		Negative(-)
male	Throat swab	3year11month	Acute bronchitis	Respiratory pathogens nucleic acid six	2023/10/15 11:27:00									Negative		Negative		Negative		Negative		Negative		Negative
female	Throat swab	12year	Acute upper respiratory tract infection	Respiratory pathogens nucleic acid six	2023/10/15 14:25:00									Negative		Negative		Negative		Negative		positive	↑	Negative
male	sputum	7year	Acute bronchitis	Respiratory bacterial nucleic acid six	2023/10/15 15:35:00																					Negative(-)		Negative(-)		Negative(-)		positive(+）	↑	Negative(-)		positive(+）	↑
male	Throat swab	7year	Acute bronchitis	Respiratory pathogens nucleic acid six	2023/10/15 15:35:00									Negative		Negative		Negative		Negative		Negative		positive	↑
male	Throat swab	10year5month	pneumonia	Respiratory pathogens nucleic acid six	2023/10/15 17:07:00									Negative		Negative		Negative		Negative		Negative		positive	↑
female	Throat swab	11month21day	Acute bronchitis	Respiratory pathogens nucleic acid six	2023/10/15 17:27:00									Negative		Negative		Negative		Negative		Negative		Negative
male	Throat swab	9month26day	pneumonia	Respiratory pathogens nucleic acid six	2023/10/15 18:58:00									Negative		Negative		Negative		Negative		Negative		Negative
female	Throat swab	2year11month	Acute laryngotracheitis	Respiratory pathogens nucleic acid six	2023/10/15 2:58:00									Negative(-)		Negative(-)		Negative(-)		Negative(-)		Negative(-)		Negative(-)
female	Throat swab	6month19day	Acute bronchitis	Respiratory pathogens nucleic acid six	2023/10/15 21:04:00									Negative		Negative		Negative		Negative		Negative		Negative
female	Throat swab	5year10month	Lobarpneumonia	Respiratory pathogens nucleic acid six	2023/10/15 21:28:00									Negative		Negative		Negative		Negative		Negative		positive	↑
female	sputum	5year10month	pneumonia	Respiratory bacterial nucleic acid six	2023/10/15 21:28:00																					Negative(-)		Negative(-)		Negative(-)		positive(+）	↑	Negative(-)		positive(+）	↑
male	sputum	6year5month	acuteAsthmatic bronchus	Respiratory bacterial nucleic acid six	2023/10/15 22:21:00																					Negative(-)		Negative(-)		Negative(-)		Negative(-)		Negative(-)		positive(+）	↑
male	Throat swab	6year5month	acuteAsthmatic bronchus	Respiratory pathogens nucleic acid six	2023/10/15 22:21:00									Negative		Negative		Negative		Negative		Negative		Negative
male	Throat swab	1year4month	Asthmatic bronchuspneumonia	Respiratory pathogens nucleic acid six	2023/10/15 7:20:00									Negative(-)		Negative(-)		positive(+）	↑	Negative(-)		Negative(-)		Negative(-)
male	Throat swab	3year9month	Acute bronchitis	Respiratory pathogens nucleic acid six	2023/10/15 8:04:00								620502202001092033	Negative(-)		Negative(-)		Negative(-)		Negative(-)		Negative(-)		Negative(-)
female	Throat swab	5year10month	Acute bronchitis	Respiratory pathogens nucleic acid six	2023/10/16 1:02:00									Negative		Negative		Negative		Negative		Negative		positive	↑
male	Throat swab	5month6day	fever，其他特指的	Respiratory pathogens nucleic acid six	2023/10/16 1:54:00									Negative		Negative		Negative		Negative		positive	↑	Negative
female	Throat swab	10month17day	Acute laryngotracheitis	Respiratory pathogens nucleic acid six	2023/10/16 10:37:00									Negative		Negative		Negative		Negative		Negative		Negative
female	Throat swab	1year5month	Acute bronchitis	Respiratory pathogens nucleic acid six	2023/10/16 11:07:00									Negative		Negative		Negative		Negative		Negative		positive	↑
male	sputum	5year1month	fever	Respiratory bacterial nucleic acid six	2023/10/16 11:09:00																					Negative(-)		Negative(-)		Negative(-)		positive(+）	↑	Negative(-)		positive(+）	↑
male	Throat swab	5year1month	fever	Respiratory pathogens nucleic acid six	2023/10/16 11:09:00									Negative		Negative		Negative		positive	↑	Negative		Negative
male	Throat swab	4year2month	Acute bronchitis	Respiratory pathogens nucleic acid six	2023/10/16 11:59:00									Negative		Negative		positive	↑	Negative		Negative		Negative
male	sputum	3year7month	Acute bronchitis	Respiratory bacterial nucleic acid six	2023/10/16 12:28:00																					Negative(-)		Negative(-)		positive(+）	↑	positive(+）	↑	Negative(-)		Negative(-)
male	Throat swab	3year7month	Acute bronchitis	Respiratory pathogens nucleic acid six	2023/10/16 12:28:00									Negative		Negative		Negative		Negative		Negative		Negative
female	Throat swab	3month25day	Acute bronchitis	Respiratory pathogens nucleic acid six	2023/10/16 12:55:00									Negative		Negative		Negative		Negative		positive	↑	Negative
female	sputum	2year3month	pneumonia	Respiratory bacterial nucleic acid six	2023/10/16 12:55:00																					Negative(-)		Negative(-)		Negative(-)		positive(+）	↑	Negative(-)		positive(+）	↑
female	Throat swab	2year3month	pneumonia	Respiratory pathogens nucleic acid six	2023/10/16 12:55:00									Negative		Negative		Negative		Negative		Negative		Negative
male	Throat swab	9year7month	Lobarpneumonia	Respiratory pathogens nucleic acid six	2023/10/16 15:39:00									Negative		Negative		Negative		Negative		Negative		Negative
female	sputum	6year2month	pneumonia	Respiratory bacterial nucleic acid six	2023/10/16 17:18:00																					Negative(-)		Negative(-)		Negative(-)		positive(+）	↑	Negative(-)		positive(+）	↑
female	Throat swab	6year2month	pneumonia	Respiratory pathogens nucleic acid six	2023/10/16 17:18:00									Negative		Negative		Negative		Negative		Negative		positive	↑
male	Throat swab	4month3day	Asthmatic bronchuspneumonia	Respiratory pathogens nucleic acid six	2023/10/16 20:21:00									Negative		Negative		Negative		Negative		Negative		Negative
male	Throat swab	2year11month	Febrile convulsion	Respiratory pathogens nucleic acid six	2023/10/16 20:22:00									Negative		Negative		Negative		positive	↑	Negative		Negative
male	Throat swab	3year7month	Acute upper respiratory tract infection	Respiratory pathogens nucleic acid six	2023/10/16 21:47:00									Negative		Negative		positive	↑	Negative		positive	↑	Negative
male	Throat swab	5month9day	Asthmatic bronchuspneumonia	Respiratory pathogens nucleic acid six	2023/10/16 22:09:00									Negative		Negative		Negative		Negative		Negative		Negative
male	Throat swab	1year11month	Acute laryngitis	Respiratory pathogens nucleic acid six	2023/10/16 5:37:00									Negative		Negative		Negative		Negative		Negative		Negative
male	sputum	1year3month	Acute laryngitis	Respiratory bacterial nucleic acid six	2023/10/16 6:49:00																					Negative(-)		positive(+）	↑	Negative(-)		Negative(-)		Negative(-)		positive(+）	↑
male	Throat swab	1year3month	Acute laryngitis	Respiratory pathogens nucleic acid six	2023/10/16 6:49:00									Negative		Negative		Negative		Negative		Negative		Negative
male	sputum	4year6month	Acute bronchitis	Respiratory bacterial nucleic acid six	2023/10/16 9:08:00																					positive(+）	↑	Negative(-)		Negative(-)		positive(+）	↑	Negative(-)		positive(+）	↑
male	Throat swab	4year6month	Acute bronchitis	Respiratory pathogens nucleic acid six	2023/10/16 9:08:00									Negative		Negative		positive	↑	Negative		Negative		Negative
male	sputum	3year9month	Acute bronchitis	Respiratory bacterial nucleic acid six	2023/10/16 9:13:00																					Negative(-)		Negative(-)		Negative(-)		positive(+）	↑	Negative(-)		positive(+）	↑
male	sputum	3year9month	Acute bronchitis	Respiratory bacterial nucleic acid six	2023/10/16 9:27:00																					Negative(-)		Negative(-)		Negative(-)		positive(+）	↑	Negative(-)		Negative(-)
female	Throat swab	4year2month	pneumonia	Respiratory pathogens nucleic acid six	2023/10/16 9:47:00									Negative		Negative		Negative		Negative		positive	↑	Negative
male	Throat swab	4year8month	acutetonsillitis	Respiratory pathogens nucleic acid six	2023/10/17 10:03:00									Negative		Negative		Negative		Negative		Negative		Negative
female	Throat swab	1year11month	Acute upper respiratory tract infection	Respiratory pathogens nucleic acid six	2023/10/17 10:24:00									Negative		Negative		Negative		Negative		Negative		Negative
male	Throat swab	1year	pneumonia	Respiratory pathogens nucleic acid six	2023/10/17 10:45:00									Negative		Negative		positive	↑	Negative		Negative		Negative
female	Throat swab	5year	Acute bronchitis	Respiratory pathogens nucleic acid six	2023/10/17 10:53:00									Negative		Negative		Negative		Negative		Negative		positive	↑
female	Throat swab	5year10month	Acute suppurative tonsillitis	Respiratory pathogens nucleic acid six	2023/10/17 11:53:00									Negative		Negative		Negative		Negative		Negative		Negative
male	sputum	3month26day	pneumonia	Respiratory bacterial nucleic acid six	2023/10/17 14:33:00																					Negative(-)		Negative(-)		Negative(-)		positive(+）	↑	Negative(-)		Negative(-)
male	Throat swab	3month26day	pneumonia	Respiratory pathogens nucleic acid six	2023/10/17 14:33:00									Negative		Negative		Negative		Negative		positive	↑	Negative
female	Throat swab	3year2month	pneumonia	Respiratory pathogens nucleic acid six	2023/10/17 15:16:00									Negative		Negative		positive	↑	Negative		Negative		positive	↑
male	sputum	1year7month	fever	Respiratory bacterial nucleic acid six	2023/10/17 18:19:00																					Negative(-)		Negative(-)		positive(+）	↑	Negative(-)		Negative(-)		positive(+）	↑
male	Throat swab	1year7month	fever	Respiratory pathogens nucleic acid six	2023/10/17 18:19:00									Negative		Negative		Negative		Negative		Negative		Negative
male	Throat swab	3year2month	pneumonia	Respiratory pathogens nucleic acid six	2023/10/17 18:24:00									Negative		Negative		Negative		positive	↑	Negative		Negative
male	Throat swab	10year2month	acutetonsillitis	Respiratory pathogens nucleic acid six	2023/10/17 18:43:00									Negative		Negative		Negative		Negative		Negative		positive	↑
male	Throat swab	3month22day	pneumonia	Respiratory pathogens nucleic acid six	2023/10/17 20:02:00									Negative		Negative		Negative		Negative		Negative		Negative
female	Throat swab	4month29day	dyspnea	Respiratory pathogens nucleic acid six	2023/10/17 21:20:00									Negative		Negative		Negative		Negative		Negative		Negative
male	Throat swab	2year2month	Acute bronchitis	Respiratory pathogens nucleic acid six	2023/10/17 21:43:00									Negative		Negative		Negative		positive	↑	positive	↑	Negative
male	sputum	3year8month	Laryngeal obstruction	Respiratory bacterial nucleic acid six	2023/10/17 23:42:00																					Negative(-)		Negative(-)		positive(+）	↑	Negative(-)		Negative(-)		positive(+）	↑
male	Throat swab	3year8month	Laryngeal obstruction	Respiratory pathogens nucleic acid six	2023/10/17 23:42:00									Negative		Negative		Negative		Negative		Negative		Negative
male	Throat swab	6year6month	pneumonia	Respiratory pathogens nucleic acid six	2023/10/17 8:57:00									Negative		Negative		Negative		Negative		Negative		positive	↑
male	Throat swab	9month17day	acuteAsthmatic bronchus	Respiratory pathogens nucleic acid six	2023/10/17 9:46:00									Negative		Negative		positive	↑	Negative		Negative		Negative
male	sputum	3year	fever	Respiratory bacterial nucleic acid six	2023/10/18 10:18:00																					Negative(-)		Negative(-)		Negative(-)		positive(+）	↑	Negative(-)		positive(+）	↑
male	Throat swab	3year	fever	Respiratory pathogens nucleic acid six	2023/10/18 10:18:00									Negative		Negative		Negative		Negative		Negative		Negative
male	sputum	4year5month	fever	Respiratory bacterial nucleic acid six	2023/10/18 10:37:00																					Negative(-)		positive(+）	↑	Negative(-)		positive(+）	↑	Negative(-)		positive(+）	↑
male	Throat swab	4year5month	fever	Respiratory pathogens nucleic acid six	2023/10/18 10:37:00									Negative		Negative		Negative		positive	↑	Negative		Negative
male	Throat swab	6year2month	fever	Respiratory pathogens nucleic acid six	2023/10/18 11:24:00									Negative		Negative		Negative		positive	↑	Negative		Negative
male	sputum	10day10hour	congenitalpneumonia	Respiratory bacterial nucleic acid six	2023/10/18 13:00:00																					Negative(-)		Negative(-)		Negative(-)		Negative(-)		Negative(-)		Negative(-)
male	Throat swab	10day10hour	congenitalpneumonia	Respiratory pathogens nucleic acid six	2023/10/18 13:00:00									Negative		Negative		positive	↑	Negative		Negative		Negative
male	Throat swab	6month16day	Asthmatic bronchuspneumonia	Respiratory pathogens nucleic acid six	2023/10/18 13:26:00									Negative		Negative		Negative		Negative		positive	↑	Negative
female	Throat swab	5year4month	Lobarpneumonia	Respiratory pathogens nucleic acid six	2023/10/18 13:53:00									Negative		Negative		Negative		Negative		Negative		positive	↑
male	Throat swab	1year10month	Acute bronchitis	Respiratory pathogens nucleic acid six	2023/10/18 15:55:00									Negative		Negative		Negative		positive	↑	Negative		positive	↑
female	sputum	9year	pneumonia	Respiratory bacterial nucleic acid six	2023/10/18 16:11:00																					Negative(-)		Negative(-)		positive(+）	↑	positive(+）	↑	Negative(-)		positive(+）	↑
female	Throat swab	9year	pneumonia	Respiratory pathogens nucleic acid six	2023/10/18 16:11:00									Negative		Negative		Negative		Negative		Negative		positive	↑
female	Throat swab	8year7month	pneumoniapneumonia	Respiratory pathogens nucleic acid six	2023/10/18 16:26:00									Negative		Negative		Negative		Negative		Negative		positive	↑
male	sputum	3month6day	pneumonia	Respiratory bacterial nucleic acid six	2023/10/18 17:16:00																					Negative(-)		Negative(-)		positive(+）	↑	Negative(-)		Negative(-)		Negative(-)
male	Throat swab	3month6day	pneumonia	Respiratory pathogens nucleic acid six	2023/10/18 17:16:00									Negative		Negative		Negative		Negative		Negative		Negative
male	sputum	3year5month	Acute bronchitis	Respiratory bacterial nucleic acid six	2023/10/18 20:16:00																					Negative(-)		Negative(-)		Negative(-)		positive(+）	↑	Negative(-)		positive(+）	↑
male	Throat swab	3year5month	Acute bronchitis	Respiratory pathogens nucleic acid six	2023/10/18 20:16:00									Negative		Negative		positive	↑	Negative		Negative		Negative
male	Throat swab	5year	Acute laryngotracheitis	Respiratory pathogens nucleic acid six	2023/10/18 23:40:00									Negative		Negative		Negative		Negative		Negative		Negative
female	Throat swab	3year1month	Acute laryngitis	Respiratory pathogens nucleic acid six	2023/10/19 0:38:00									Negative		Negative		Negative		Negative		Negative		Negative
male	sputum	9year9month	pneumonia	Respiratory bacterial nucleic acid six	2023/10/19 1:43:00																					Negative(-)		Negative(-)		Negative(-)		positive(+）	↑	Negative(-)		positive(+）	↑
male	Throat swab	9year9month	pneumonia	Respiratory pathogens nucleic acid six	2023/10/19 1:43:00									Negative		Negative		Negative		positive	↑	Negative		positive	↑
male	Throat swab	3year4month	pneumonia	Respiratory pathogens nucleic acid six	2023/10/19 10:17:00									Negative		Negative		positive	↑	Negative		Negative		Negative
female	sputum	6month11day	Acute bronchitis	Respiratory bacterial nucleic acid six	2023/10/19 10:24:00																					Negative(-)		Negative(-)		Negative(-)		Negative(-)		Negative(-)		Negative(-)
female	Throat swab	6month11day	Acute bronchitis	Respiratory pathogens nucleic acid six	2023/10/19 10:24:00									Negative		Negative		positive	↑	Negative		Negative		Negative
male	sputum	2month7day	severe casepneumonia	Respiratory bacterial nucleic acid six	2023/10/19 10:36:00																					Negative(-)		Negative(-)		Negative(-)		positive(+）	↑	Negative(-)		Negative(-)
male	Throat swab	2month7day	severe casepneumonia	Respiratory pathogens nucleic acid six	2023/10/19 10:36:00									Negative		Negative		positive	↑	Negative		positive	↑	Negative
female	Throat swab	7year6month	Acute suppurative tonsillitis	Respiratory pathogens nucleic acid six	2023/10/19 11:52:00									Negative		Negative		Negative		positive	↑	positive	↑	Negative
male	sputum	4year10month	Acute bronchitis	Respiratory bacterial nucleic acid six	2023/10/19 12:22:00																					Negative(-)		Negative(-)		Negative(-)		positive(+）	↑	Negative(-)		positive(+）	↑
male	Throat swab	4year10month	Acute bronchitis	Respiratory pathogens nucleic acid six	2023/10/19 12:22:00									Negative		Negative		Negative		positive	↑	Negative		Negative
male	Throat swab	13year	pneumonia	Respiratory pathogens nucleic acid six	2023/10/19 12:29:00									Negative		Negative		Negative		Negative		Negative		positive	↑
male	sputum	1year9month	pneumonia	Respiratory bacterial nucleic acid six	2023/10/19 13:00:00																					positive(+）	↑	positive(+）	↑	Negative(-)		positive(+）	↑	Negative(-)		positive(+）	↑
male	Throat swab	1year9month	Unexplained convulsion	Respiratory pathogens nucleic acid six	2023/10/19 13:00:00									Negative		Negative		Negative		positive	↑	Negative		Negative
female	Throat swab	1year3month	Febrile convulsion	Respiratory pathogens nucleic acid six	2023/10/19 13:18:00									Negative		Negative		Negative		Negative		positive	↑	Negative
female	Throat swab	6year8month	fever	Respiratory pathogens nucleic acid six	2023/10/19 13:25:00									Negative		Negative		Negative		Negative		Negative		positive	↑
male	sputum	2year7month	Asthmatic bronchuspneumonia	Respiratory bacterial nucleic acid six	2023/10/19 13:51:00																					Negative(-)		Negative(-)		Negative(-)		positive(+）	↑	Negative(-)		positive(+）	↑
male	Throat swab	2year7month	Asthmatic bronchuspneumonia	Respiratory pathogens nucleic acid six	2023/10/19 13:51:00									Negative		Negative		positive	↑	Negative		Negative(-)		Negative
female	sputum	2year1month	Acute bronchitis	Respiratory bacterial nucleic acid six	2023/10/19 15:17:00																					Negative(-)		Negative(-)		Negative(-)		Negative(-)		Negative(-)		positive(+）	↑
female	Throat swab	2year1month	Acute bronchitis	Respiratory pathogens nucleic acid six	2023/10/19 15:17:00									Negative		Negative		positive	↑	Negative		Negative		positive	↑
female	Throat swab	4year4month	Acute bronchitis	Respiratory pathogens nucleic acid six	2023/10/19 16:53:00									Negative(-)		Negative(-)		Negative(-)		Negative(-)		Negative(-)		Negative(-)
male	Throat swab	6year6month	Acute upper respiratory tract infection	Respiratory pathogens nucleic acid six	2023/10/19 17:13:00									Negative		Negative		Negative		positive	↑	Negative		Negative
female	Throat swab	2year11month	Acute laryngitis	Respiratory pathogens nucleic acid six	2023/10/19 17:35:00									Negative		Negative		positive	↑	positive	↑	positive	↑	Negative
male	Throat swab	1year2month	Acute bronchitis	Respiratory pathogens nucleic acid six	2023/10/19 2:15:00									Negative		Negative		Negative		Negative		Negative		Negative
female	Throat swab	3year11month	Acute laryngotracheitis	Respiratory pathogens nucleic acid six	2023/10/19 2:20:00									Negative		Negative		Negative		Negative		Negative		Negative
female	sputum	3year1month	pneumonia	Respiratory bacterial nucleic acid six	2023/10/19 21:18:00																					Negative(-)		Negative(-)		Negative(-)		Negative(-)		Negative(-)		positive(+）	↑
female	Throat swab	3year1month	pneumonia	Respiratory pathogens nucleic acid six	2023/10/19 21:18:00									Negative		Negative		positive	↑	Negative		Negative		positive	↑
female	Throat swab	1year	acuteAsthmatic bronchus	Respiratory pathogens nucleic acid six	2023/10/19 22:26:00									Negative		Negative		positive	↑	Negative		positive	↑	Negative
female	Throat swab	1month3day	pneumonia	Respiratory pathogens nucleic acid six	2023/10/19 23:37:00									Negative		Negative		Negative		Negative		Negative		Negative
female	sputum	14day16hour	newbornpneumonia	Respiratory bacterial nucleic acid six	2023/10/19 3:28:00																					positive(+）	↑	Negative(-)		Negative(-)		Negative(-)		Negative(-)		Negative(-)
female	Throat swab	14day16hour	newbornpneumonia	Respiratory pathogens nucleic acid six	2023/10/19 3:28:00									Negative		Negative		positive	↑	Negative		Negative		Negative
female	Throat swab	1year5month	Acute laryngitis	Respiratory pathogens nucleic acid six	2023/10/19 6:10:00									Negative		Negative		positive	↑	Negative		Negative		Negative
male	Throat swab	9month22day	pneumonia	Respiratory pathogens nucleic acid six	2023/10/19 9:56:00									Negative		Negative		Negative		Negative		Negative		Negative
male	Throat swab	3year6month	Acute bronchitis	Respiratory pathogens nucleic acid six	2023/10/2 10:07:00									Negative		Negative		Negative		Negative		Negative		Negative
male	Throat swab	1year5month	pneumonia	Respiratory pathogens nucleic acid six	2023/10/2 10:34:00									Negative		Negative		Negative		Negative		positive	↑	Negative
male	Throat swab	2year4month	Unexplained convulsion	Respiratory pathogens nucleic acid six	2023/10/2 10:39:00									Negative		Negative		Negative		Negative		Negative		Negative
male	sputum	6year2month	pneumonia	Respiratory bacterial nucleic acid six	2023/10/2 10:49:00																					Negative(-)		Negative(-)		Negative(-)		positive(+）	↑	Negative(-)		positive(+）	↑
male	Throat swab	6year2month	pneumonia	Respiratory pathogens nucleic acid six	2023/10/2 10:49:00									Negative		Negative		Negative		positive	↑	Negative		positive	↑
male	Throat swab	1year	Acute laryngitis	Respiratory pathogens nucleic acid six	2023/10/2 12:08:00									Negative		Negative		Negative		Negative		Negative		Negative
female	Throat swab	1year1month	fever	Respiratory pathogens nucleic acid six	2023/10/2 12:13:00									Negative		Negative		Negative		Negative		Negative		Negative
male	Throat swab	1year3month	bronchusasthma(acuteStage of attack)	Respiratory pathogens nucleic acid six	2023/10/2 14:31:00									Negative		Negative		Negative		Negative		positive	↑	Negative
female	sputum	4year	Acute bronchitis	Respiratory bacterial nucleic acid six	2023/10/2 15:43:00																					Negative(-)		Negative(-)		Negative(-)		positive(+）	↑	Negative(-)		positive(+）	↑
female	Throat swab	4year	Acute bronchitis	Respiratory pathogens nucleic acid six	2023/10/2 15:43:00									Negative		Negative		Negative		Negative		Negative		Negative
male	Throat swab	1year1month	Infantile diarrhea	Respiratory pathogens nucleic acid six	2023/10/2 16:00:00									Negative		Negative		Negative		Negative		Negative		Negative
female	Throat swab	1year5month	Acute bronchitis	Respiratory pathogens nucleic acid six	2023/10/2 16:05:00									Negative		Negative		Negative		positive	↑	positive	↑	Negative
male	Throat swab	2month28day	pneumonia	Respiratory pathogens nucleic acid six	2023/10/2 17:26:00									Negative		Negative		positive	↑	Negative		Negative		Negative
male	Throat swab	5year3month	bronchuspneumonia	Respiratory pathogens nucleic acid six	2023/10/2 17:30:00									Negative		Negative		Negative		Negative		Negative		Negative
female	sputum	7year3month	Acute bronchitis	Respiratory bacterial nucleic acid six	2023/10/2 18:12:00																					Negative(-)		Negative(-)		Negative(-)		positive(+）	↑	Negative(-)		positive(+）	↑
female	Throat swab	7year3month	Acute bronchitis	Respiratory pathogens nucleic acid six	2023/10/2 18:12:00									Negative		Negative		Negative		Negative		positive	↑	positive	↑
male	Throat swab	3year11month	fever	Respiratory pathogens nucleic acid six	2023/10/2 19:37:00									Negative		Negative		Negative		Negative		positive	↑	Negative
female	sputum	1year7month	Acute laryngitis	Respiratory bacterial nucleic acid six	2023/10/2 2:15:00																					Negative(-)		Negative(-)		Negative(-)		positive(+）	↑	Negative(-)		positive(+）	↑
female	Throat swab	1year7month	Acute laryngitis	Respiratory pathogens nucleic acid six	2023/10/2 2:15:00									Negative		Negative		Negative		Negative		Negative		Negative
male	Throat swab	6year1month	Acute bronchitis	Respiratory pathogens nucleic acid six	2023/10/2 22:04:00									Negative		Negative		Negative		Negative		Negative		positive	↑
female	Throat swab	4year5month	fever	Respiratory pathogens nucleic acid six	2023/10/20 0:55:00									Negative		Negative		Negative		positive	↑	Negative		Negative
female	sputum	3year3month	Acute bronchitis	Respiratory bacterial nucleic acid six	2023/10/20 10:08:00																					Negative(-)		Negative(-)		Negative(-)		Negative(-)		Negative(-)		Negative(-)
female	Throat swab	3year3month	Acute bronchitis	Respiratory pathogens nucleic acid six	2023/10/20 10:08:00									Negative		Negative		positive	↑	Negative		Negative		Negative
male	Throat swab	3year9month	pneumonia	Respiratory pathogens nucleic acid six	2023/10/20 11:09:00									Negative		Negative		positive	↑	Negative		Negative		Negative
female	Throat swab	9year3month	Acute bronchitis	Respiratory pathogens nucleic acid six	2023/10/20 11:19:00									Negative		Negative		Negative		Negative		positive	↑	Negative
female	Throat swab	3year11month	bronchus	Respiratory pathogens nucleic acid six	2023/10/20 11:38:00									Negative		Negative		Negative		Negative		Negative		positive	↑
female	sputum	3year11month	pneumonia	Respiratory bacterial nucleic acid six	2023/10/20 11:38:00																					Negative(-)		Negative(-)		Negative(-)		positive(+）	↑	Negative(-)		Negative(-)
male	sputum	29day10hour	Acute bronchitis	Respiratory bacterial nucleic acid six	2023/10/20 11:44:00																					Negative(-)		Negative(-)		Negative(-)		Negative(-)		Negative(-)		positive(+）	↑
male	Throat swab	29day10hour	Acute bronchitis	Respiratory pathogens nucleic acid six	2023/10/20 11:44:00									Negative		Negative		Negative		Negative		Negative		Negative
female	Throat swab	3month24day	pneumonia	Respiratory pathogens nucleic acid six	2023/10/20 11:56:00									Negative		Negative		positive	↑	Negative		Negative		Negative
male	sputum	6year1month	Acute bronchitis	Respiratory bacterial nucleic acid six	2023/10/20 12:01:00																					Negative(-)		Negative(-)		Negative(-)		Negative(-)		Negative(-)		positive(+）	↑
male	Throat swab	6year1month	Acute bronchitis	Respiratory pathogens nucleic acid six	2023/10/20 12:01:00									Negative		Negative		Negative		Negative		Negative		positive	↑
male	Throat swab	4year1month	Febrile convulsion	Respiratory pathogens nucleic acid six	2023/10/20 12:31:00									Negative		Negative		Negative		positive	↑	Negative		Negative
male	Throat swab	2year8month	Unexplained convulsion	Respiratory pathogens nucleic acid six	2023/10/20 12:33:00									Negative		Negative		Negative		Negative		Negative		Negative
male	Throat swab	3year6month	pneumonia	Respiratory pathogens nucleic acid six	2023/10/20 13:22:00									Negative		Negative		positive	↑	Negative		positive	↑	Negative
male	Throat swab	1year1month	Asthmatic bronchuspneumonia	Respiratory pathogens nucleic acid six	2023/10/20 13:35:00									Negative		Negative		Negative		Negative		Negative		Negative
female	Throat swab	7year7month	Lobarpneumonia	Respiratory pathogens nucleic acid six	2023/10/20 13:49:00									Negative		Negative		Negative		Negative		Negative		Negative
female	sputum	7year7month	pneumonia	Respiratory bacterial nucleic acid six	2023/10/20 13:49:00																					Negative(-)		Negative(-)		Negative(-)		Negative(-)		Negative(-)		positive(+）	↑
female	sputum	4year9month	pneumonia	Respiratory bacterial nucleic acid six	2023/10/20 14:58:00																					Negative(-)		Negative(-)		Negative(-)		positive(+）	↑	Negative(-)		Negative(-)
female	Throat swab	4year9month	pneumonia	Respiratory pathogens nucleic acid six	2023/10/20 14:58:00									Negative		Negative		Negative		Negative		Negative		positive	↑
female	Throat swab	2year5month	Acute laryngotracheitis	Respiratory pathogens nucleic acid six	2023/10/20 16:18:00									Negative		Negative		Negative		Negative		Negative		Negative
male	sputum	6month15day	Asthmatic bronchuspneumonia	Respiratory bacterial nucleic acid six	2023/10/20 16:54:00																					Negative(-)		Negative(-)		Negative(-)		Negative(-)		Negative(-)		Negative(-)
male	Throat swab	6month14day	Asthmatic bronchuspneumonia	Respiratory pathogens nucleic acid six	2023/10/20 16:54:00									Negative		Negative		positive	↑	Negative		Negative		Negative
male	sputum	3year2month	pneumonia	Respiratory bacterial nucleic acid six	2023/10/20 17:46:00																					Negative(-)		Negative(-)		Negative(-)		positive(+）	↑	Negative(-)		positive(+）	↑
male	Throat swab	3year1month	pneumonia	Respiratory pathogens nucleic acid six	2023/10/20 17:46:00									Negative		Negative		Negative		Negative		Negative		Negative
male	sputum	1year9month	pneumonia	Respiratory bacterial nucleic acid six	2023/10/20 18:06:00																					Negative(-)		Negative(-)		Negative(-)		Negative(-)		Negative(-)		Negative(-)
male	Throat swab	1year9month	pneumonia	Respiratory pathogens nucleic acid six	2023/10/20 18:06:00									Negative		Negative		positive	↑	Negative		Negative		positive	↑
male	sputum	7year5month	pneumonia	Respiratory bacterial nucleic acid six	2023/10/20 18:23:00																					Negative(-)		Negative(-)		Negative(-)		positive(+）	↑	Negative(-)		Negative(-)
male	Throat swab	7year5month	pneumonia	Respiratory pathogens nucleic acid six	2023/10/20 18:23:00									Negative		Negative		Negative		Negative		Negative		positive	↑
female	Throat swab	11year11month	Lobarpneumonia	Respiratory pathogens nucleic acid six	2023/10/20 18:36:00									Negative		Negative		Negative		Negative		Negative		positive	↑
female	sputum	11year11month	pneumonia	Respiratory bacterial nucleic acid six	2023/10/20 18:36:00																					Negative(-)		Negative(-)		Negative(-)		positive(+）	↑	Negative(-)		Negative(-)
male	Throat swab	1year8month	pneumonia	Respiratory pathogens nucleic acid six	2023/10/20 18:49:00									Negative		Negative		Negative		Negative		Negative		Negative
male	Throat swab	1year8month	Febrile convulsion	Respiratory pathogens nucleic acid six	2023/10/20 19:47:00									Negative		Negative		Negative		Negative		positive(+）	↑	Negative
female	Throat swab	9year2month	fever	Respiratory pathogens nucleic acid six	2023/10/20 20:28:00									Negative		Negative		Negative		Negative		Negative		Negative
male	Throat swab	1year	Asthmatic bronchuspneumonia	Respiratory pathogens nucleic acid six	2023/10/20 20:34:00									Negative		Negative		Negative		Negative		Negative		Negative
male	Throat swab	3year11month	Febrile convulsion	Respiratory pathogens nucleic acid six	2023/10/20 20:36:00									Negative		Negative		Negative		Negative		Negative		Negative
female	Throat swab	1year11month	Acute laryngitis	Respiratory pathogens nucleic acid six	2023/10/20 21:36:00									Negative		Negative		Negative		Negative		Negative		positive	↑
female	Throat swab	4year1month	Acute laryngotracheitis	Respiratory pathogens nucleic acid six	2023/10/20 21:47:00									Negative		Negative		Negative		Negative		Negative		Negative
female	Throat swab	3year8month	fever	Respiratory pathogens nucleic acid six	2023/10/20 22:24:00									positive	↑	Negative		Negative		Negative		Negative		Negative
male	sputum	4year1month	Acute bronchitis	Respiratory bacterial nucleic acid six	2023/10/20 23:05:00																					Negative(-)		Negative(-)		Negative(-)		positive(+）	↑	Negative(-)		Negative(-)
male	Throat swab	4year1month	Acute bronchitis	Respiratory pathogens nucleic acid six	2023/10/20 23:05:00									Negative		Negative		Negative		Negative		positive	↑	Negative
male	sputum	5year11month	Acute bronchitis	Respiratory bacterial nucleic acid six	2023/10/20 9:41:00																					Negative(-)		Negative(-)		Negative(-)		positive(+）	↑	Negative(-)		Negative(-)
male	Throat swab	5year11month	Acute bronchitis	Respiratory pathogens nucleic acid six	2023/10/20 9:41:00									Negative		Negative		Negative		Negative		Negative		Negative
female	Throat swab	10year	pneumonia	Respiratory pathogens nucleic acid six	2023/10/21 10:08:00									positive	↑	Negative		Negative		Negative		Negative		Negative
female	sputum	7year8month	pneumonia	Respiratory bacterial nucleic acid six	2023/10/21 10:49:00																					Negative(-)		Negative(-)		Negative(-)		positive(+）	↑	Negative(-)		Negative(-)
female	Throat swab	7year8month	pneumonia	Respiratory pathogens nucleic acid six	2023/10/21 10:49:00									Negative		Negative		Negative		Negative		positive	↑	Negative
male	Throat swab	1month27day	pneumonia	Respiratory pathogens nucleic acid six	2023/10/21 11:42:00									Negative		Negative		Negative		Negative		Negative		Negative
female	Throat swab	3month8day	pneumonia	Respiratory pathogens nucleic acid six	2023/10/21 13:00:00									Negative		Negative		positive(+）	↑	Negative		Negative		Negative
female	sputum	3month8day	pneumonia	Respiratory bacterial nucleic acid six	2023/10/21 13:09:00																					Negative(-)		positive(+）	↑	Negative(-)		Negative(-)		Negative(-)		positive(+）	↑
male	Throat swab	1year2month	Asthmatic bronchuspneumonia	Respiratory pathogens nucleic acid six	2023/10/21 14:40:00									Negative		Negative		positive	↑	Negative		Negative		Negative
male	sputum	3year1month	pneumonia	Respiratory bacterial nucleic acid six	2023/10/21 15:47:00																					Negative(-)		Negative(-)		Negative(-)		positive(+）	↑	Negative(-)		positive(+）	↑
male	Throat swab	3year1month	pneumonia	Respiratory pathogens nucleic acid six	2023/10/21 15:47:00									Negative		Negative		Negative		Negative		Negative		positive	↑
male	Throat swab	7month26day	Acute laryngitis	Respiratory pathogens nucleic acid six	2023/10/21 15:52:00									Negative		Negative		Negative		Negative		Negative		Negative
female	Throat swab	3year4month	Acute laryngitis	Respiratory pathogens nucleic acid six	2023/10/21 17:07:00									Negative		Negative		Negative		Negative		Negative		Negative
male	sputum	7month24day	pneumonia	Respiratory bacterial nucleic acid six	2023/10/21 17:49:00																					Negative(-)		Negative(-)		Negative(-)		Negative(-)		Negative(-)		positive(+）	↑
male	Throat swab	7month23day	pneumonia	Respiratory pathogens nucleic acid six	2023/10/21 17:49:00									Negative		Negative		Negative		Negative		positive	↑	Negative
female	sputum	2year1month	Acute laryngitis	Respiratory bacterial nucleic acid six	2023/10/21 2:05:00																					Negative(-)		Negative(-)		Negative(-)		positive(+）	↑	Negative(-)		Negative(-)
female	Throat swab	2year1month	Acute laryngitis	Respiratory pathogens nucleic acid six	2023/10/21 2:05:00									Negative		Negative		Negative		Negative		Negative		Negative
male	Throat swab	1year4month	fever	Respiratory pathogens nucleic acid six	2023/10/21 20:08:00									Negative		Negative		Negative		positive	↑	Negative		Negative
female	Throat swab	4day20hour	fever	Respiratory pathogens nucleic acid six	2023/10/21 20:29:00									Negative		Negative		Negative		Negative		Negative		Negative
female	Throat swab	4year4month	pneumonia	Respiratory pathogens nucleic acid six	2023/10/21 22:19:00									Negative		Negative		Negative		Negative		Negative		Negative
male	Throat swab	1month25day	pneumonia	Respiratory pathogens nucleic acid six	2023/10/21 23:41:00									Negative		Negative		Negative		Negative		Negative		Negative
male	Throat swab	5year3month	Febrile convulsion	Respiratory pathogens nucleic acid six	2023/10/21 5:53:00									Negative		Negative		Negative		Negative		Negative		Negative
male	Throat swab	11year2month	fever	Respiratory pathogens nucleic acid six	2023/10/21 9:39:00									Negative		Negative		Negative		positive	↑	Negative		Negative
female	Throat swab	3year5month	Lobarpneumonia	Respiratory pathogens nucleic acid six	2023/10/22 10:26:00									Negative(-)		Negative(-)		positive(+）	↑	Negative(-)		Negative(-)		Negative(-)
male	sputum	2year9month	Acute bronchitis	Respiratory bacterial nucleic acid six	2023/10/22 12:30:00																					Negative(-)		Negative(-)		Negative(-)		positive(+）	↑	Negative(-)		Negative(-)
male	Throat swab	2year9month	Acute bronchitis	Respiratory pathogens nucleic acid six	2023/10/22 12:30:00									Negative(-)		Negative(-)		positive(+）	↑	Negative(-)		Negative(-)		Negative(-)
male	Throat swab	13year	bronchusasthma(acuteStage of attack)	Respiratory pathogens nucleic acid six	2023/10/22 13:14:00									Negative(-)		Negative(-)		Negative(-)		Negative(-)		positive(+）	↑	Negative(-)
male	Throat swab	3year1month	Acute upper respiratory tract infection	Respiratory pathogens nucleic acid six	2023/10/22 14:32:00									Negative(-)		Negative(-)		Negative(-)		Negative(-)		Negative(-)		Negative(-)
male	Throat swab	10year10month	fever	Respiratory pathogens nucleic acid six	2023/10/22 14:50:00									Negative(-)		Negative(-)		Negative(-)		Negative(-)		Negative(-)		Negative(-)
female	sputum	10year5month	Acute bronchitis	Respiratory bacterial nucleic acid six	2023/10/22 15:15:00																					Negative(-)		Negative(-)		Negative(-)		Negative(-)		Negative(-)		Negative(-)
female	Throat swab	10year5month	Acute bronchitis	Respiratory pathogens nucleic acid six	2023/10/22 15:15:00									Negative(-)		Negative(-)		Negative(-)		positive(+）	↑	Negative(-)		Negative(-)
female	Throat swab	11month25day	bronchuspneumonia	Respiratory pathogens nucleic acid six	2023/10/22 16:27:00									Negative(-)		Negative(-)		positive(+）	↑	Negative(-)		Negative(-)		Negative(-)
male	Throat swab	6month10day	severe casepneumonia	Respiratory pathogens nucleic acid six	2023/10/22 17:41:00									Negative(-)		Negative(-)		Negative(-)		Negative(-)		Negative(-)		Negative(-)
female	sputum	9year2month	Acute bronchitis	Respiratory bacterial nucleic acid six	2023/10/22 18:36:00																					Negative(-)		Negative(-)		Negative(-)		Negative(-)		Negative(-)		positive(+）	↑
female	Throat swab	9year2month	Acute bronchitis	Respiratory pathogens nucleic acid six	2023/10/22 18:36:00									Negative(-)		Negative(-)		Negative(-)		Negative(-)		Negative(-)		positive(+)	↑
male	sputum	4year	Acute bronchitis	Respiratory bacterial nucleic acid six	2023/10/22 21:03:00																					Negative(-)		Negative(-)		Negative(-)		positive(+）	↑	Negative(-)		Negative(-)
male	Throat swab	4year	Acute bronchitis	Respiratory pathogens nucleic acid six	2023/10/22 21:03:00									Negative(-)		Negative(-)		Negative(-)		Negative(-)		positive(+）	↑	Negative(-)
female	Throat swab	4day14hour	newborn病理性黄疸	Respiratory pathogens nucleic acid six	2023/10/22 7:55:00									Negative		Negative		positive	↑	Negative		Negative		Negative
male	Throat swab	6year5month	acuteAsthmatic bronchus	Respiratory pathogens nucleic acid six	2023/10/22 8:30:00									positive	↑	Negative		Negative		positive	↑	Negative		Negative
male	sputum	11year4month	Acute bronchitis	Respiratory bacterial nucleic acid six	2023/10/23 0:04:00																					Negative(-)		Negative(-)		Negative(-)		Negative(-)		Negative(-)		Negative(-)
male	Throat swab	11year4month	Acute bronchitis	Respiratory pathogens nucleic acid six	2023/10/23 0:04:00									Negative(-)		Negative(-)		Negative(-)		Negative(-)		positive(+）	↑	Negative(-)
male	Throat swab	2year	pneumonia	Respiratory pathogens nucleic acid six	2023/10/23 0:52:00									Negative(-)		Negative(-)		Negative(-)		Negative(-)		positive(+）	↑	Negative(-)
female	Throat swab	4year11month	Acute bronchitis	Respiratory pathogens nucleic acid six	2023/10/23 10:18:00									Negative		Negative		Negative		Negative		positive	↑	Negative
male	Throat swab	1year3month	pneumonia	Respiratory pathogens nucleic acid six	2023/10/23 11:24:00									Negative		Negative		Negative		Negative		Negative		Negative
male	Throat swab	19hour45min钟	newborn水肿	Respiratory pathogens nucleic acid six	2023/10/23 11:45:00									Negative		Negative		Negative		Negative		Negative		Negative
male	Throat swab	7year3month	Lobarpneumonia	Respiratory pathogens nucleic acid six	2023/10/23 12:47:00									Negative		Negative		Negative		Negative		positive	↑	positive	↑
female	sputum	3year7month	Acute bronchitis	Respiratory bacterial nucleic acid six	2023/10/23 13:23:00																					Negative(-)		Negative(-)		Negative(-)		positive(+）	↑	Negative(-)		Negative(-)
female	Throat swab	3year7month	Acute bronchitis	Respiratory pathogens nucleic acid six	2023/10/23 13:23:00									Negative		Negative		Negative		positive	↑	positive	↑	Negative
male	Throat swab	12year	pneumonia	Respiratory pathogens nucleic acid six	2023/10/23 13:37:00									Negative		Negative		Negative		Negative		Negative		positive	↑
male	Throat swab	2year11month	pneumonia	Respiratory pathogens nucleic acid six	2023/10/23 15:39:00									Negative		Negative		Negative		Negative		Negative		positive	↑
male	Throat swab	4year1month	pneumonia	Respiratory pathogens nucleic acid six	2023/10/23 15:57:00									Negative		Negative		Negative		Negative		positive	↑	Negative
female	Throat swab	4year	Acute bronchitis	Respiratory pathogens nucleic acid six	2023/10/23 16:42:00									Negative		Negative		Negative		Negative		positive	↑	Negative
female	Throat swab	11year3month	fever	Respiratory pathogens nucleic acid six	2023/10/23 16:59:00									Negative		Negative		Negative		Negative		Negative		positive	↑
male	Throat swab	5year8month	fever	Respiratory pathogens nucleic acid six	2023/10/23 17:04:00									Negative		Negative		Negative		Negative		positive	↑	Negative
female	Throat swab	12year	pneumonia	Respiratory pathogens nucleic acid six	2023/10/23 17:27:00									Negative		Negative		Negative		Negative		Negative		positive	↑
female	sputum	11year11month	Acute bronchitis	Respiratory bacterial nucleic acid six	2023/10/23 17:28:00																					Negative(-)		Negative(-)		Negative(-)		positive(+）	↑	Negative(-)		Negative(-)
female	Throat swab	11year11month	Acute bronchitis	Respiratory pathogens nucleic acid six	2023/10/23 17:28:00									Negative		Negative		positive	↑	Negative		Negative		positive	↑
male	Throat swab	3year	bronchus	Respiratory pathogens nucleic acid six	2023/10/23 17:57:00									Negative		Negative		Negative		Negative		positive	↑	Negative
female	sputum	9year8month	pneumonia	Respiratory bacterial nucleic acid six	2023/10/23 17:57:00																					Negative(-)		Negative(-)		Negative(-)		positive(+）	↑	Negative(-)		positive(+）	↑
female	Throat swab	9year8month	pneumonia	Respiratory pathogens nucleic acid six	2023/10/23 17:57:00									Negative		Negative		Negative		Negative		Negative		positive	↑
male	sputum	7month18day	fever	Respiratory bacterial nucleic acid six	2023/10/23 18:38:00																					Negative(-)		Negative(-)		positive(+）	↑	Negative(-)		Negative(-)		Negative(-)
male	Throat swab	7month18day	fever	Respiratory pathogens nucleic acid six	2023/10/23 18:38:00									Negative		Negative		Negative		Negative		Negative		Negative
male	Throat swab	9year4month	pneumonia	Respiratory pathogens nucleic acid six	2023/10/23 19:07:00									Negative		Negative		Negative		Negative		Negative		positive	↑
male	sputum	13year	pneumonia	Respiratory bacterial nucleic acid six	2023/10/23 19:17:00																					Negative(-)		Negative(-)		Negative(-)		Negative(-)		Negative(-)		Negative(-)
male	Throat swab	13year	pneumonia	Respiratory pathogens nucleic acid six	2023/10/23 19:17:00									Negative		Negative		Negative		Negative		Negative		Negative
male	Throat swab	3year2month	Acute upper respiratory tract infection	Respiratory pathogens nucleic acid six	2023/10/23 19:58:00									Negative		Negative		positive	↑	Negative		positive	↑	Negative
female	Throat swab	14day16hour	newbornpneumonia	Respiratory pathogens nucleic acid six	2023/10/23 20:01:00									Negative		Negative		Negative		Negative		Negative		Negative
female	Throat swab	8month21day	acuteAsthmatic bronchus	Respiratory pathogens nucleic acid six	2023/10/23 20:04:00									Negative		Negative		Negative		Negative		Negative		Negative
female	Throat swab	3year9month	Acute upper respiratory tract infection	Respiratory pathogens nucleic acid six	2023/10/23 20:24:00									Negative		Negative		Negative		Negative		positive	↑	Negative
female	sputum	1year	pneumonia	Respiratory bacterial nucleic acid six	2023/10/23 20:46:00																					Negative(-)		Negative(-)		Negative(-)		positive(+）	↑	Negative(-)		positive(+）	↑
female	Throat swab	1year	Infantile diarrhea	Respiratory pathogens nucleic acid six	2023/10/23 20:46:00									Negative		Negative		positive	↑	Negative		positive	↑	Negative
male	Throat swab	6month26day	bronchuspneumonia	Respiratory pathogens nucleic acid six	2023/10/23 20:56:00									Negative		Negative		Negative		Negative		Negative		positive	↑
male	Throat swab	4year5month	Febrile convulsion	Respiratory pathogens nucleic acid six	2023/10/23 21:15:00									Negative		Negative		Negative		Negative		positive	↑	Negative
male	sputum	3year11month	Acute bronchitis	Respiratory bacterial nucleic acid six	2023/10/23 21:47:00																					Negative(-)		Negative(-)		Negative(-)		Negative(-)		Negative(-)		positive(+）	↑
male	Throat swab	3year11month	Acute bronchitis	Respiratory pathogens nucleic acid six	2023/10/23 21:47:00									Negative		Negative		Negative		Negative		Negative		positive	↑
male	sputum	3year4month	Acute bronchitis	Respiratory bacterial nucleic acid six	2023/10/23 22:49:00																					Negative(-)		Negative(-)		positive(+）	↑	positive(+）	↑	Negative(-)		positive(+）	↑
male	Throat swab	3year4month	Acute bronchitis	Respiratory pathogens nucleic acid six	2023/10/23 22:49:00									Negative		Negative		Negative		Negative		Negative		Negative
female	sputum	3year4month	Acute upper respiratory tract infection	Respiratory bacterial nucleic acid six	2023/10/23 23:16:00																					Negative(-)		Negative(-)		Negative(-)		Negative(-)		Negative(-)		Negative(-)
female	Throat swab	3year4month	Acute upper respiratory tract infection	Respiratory pathogens nucleic acid six	2023/10/23 23:16:00									Negative		Negative		Negative		positive	↑	Negative		positive	↑
male	sputum	24day5hour	newborn喂养不足	Respiratory bacterial nucleic acid six	2023/10/23 23:46:00																					Negative(-)		Negative(-)		Negative(-)		Negative(-)		Negative(-)		Negative(-)
male	Throat swab	24day5hour	newborn喂养不足	Respiratory pathogens nucleic acid six	2023/10/23 23:46:00									Negative		Negative		Negative		Negative		positive	↑	Negative
male	Throat swab	3year7month	dyspnea	Respiratory pathogens nucleic acid six	2023/10/23 6:46:00									Negative(-)		Negative(-)		Negative(-)		Negative(-)		Negative(-)		Negative(-)
female	sputum	17day15hour	newbornpneumonia	Respiratory bacterial nucleic acid six	2023/10/23 8:59:00																					Negative(-)		Negative(-)		Negative(-)		Negative(-)		Negative(-)		Negative(-)
female	Throat swab	17day15hour	newbornpneumonia	Respiratory pathogens nucleic acid six	2023/10/23 8:59:00									Negative		Negative		positive	↑	Negative		Negative		Negative
male	Throat swab	3year4month	Acute bronchitis	Respiratory pathogens nucleic acid six	2023/10/23 9:56:00								620502202006162336	Negative(-)		Negative(-)		Negative(-)		Negative(-)		Negative(-)		Negative(-)
female	Throat swab	8year5month	bronchuspneumonia	Respiratory pathogens nucleic acid six	2023/10/24 1:08:00									Negative		Negative		Negative		Negative		Negative		positive	↑
female	sputum	8year5month	pneumonia	Respiratory bacterial nucleic acid six	2023/10/24 1:08:00																					Negative(-)		Negative(-)		Negative(-)		Negative(-)		Negative(-)		Negative(-)
female	Throat swab	1year	Febrile convulsion	Respiratory pathogens nucleic acid six	2023/10/24 10:07:00									Negative(-)		Negative(-)		Negative(-)		Negative(-)		Negative(-)		Negative(-)
female	sputum	4day14hour	pneumonia	Respiratory bacterial nucleic acid six	2023/10/24 10:25:00																					Negative(-)		Negative(-)		Negative(-)		Negative(-)		Negative(-)		Negative(-)
male	Throat swab	7year3month	pneumonia	Respiratory pathogens nucleic acid six	2023/10/24 10:55:00									Negative(-)		Negative(-)		Negative(-)		Negative(-)		Negative(-)		positive(+)	↑
female	Throat swab	7month10day	acuteAsthmatic bronchus	Respiratory pathogens nucleic acid six	2023/10/24 11:13:00									Negative(-)		Negative(-)		Negative(-)		Negative(-)		positive(+）	↑	Negative(-)
male	Throat swab	1year	Acute laryngotracheitis	Respiratory pathogens nucleic acid six	2023/10/24 11:45:00									Negative(-)		Negative(-)		Negative(-)		Negative(-)		Negative(-)		Negative(-)
male	Throat swab	2year11month	pneumonia	Respiratory pathogens nucleic acid six	2023/10/24 13:27:00									Negative(-)		Negative(-)		Negative(-)		Negative(-)		positive(+）	↑	Negative(-)
male	Throat swab	1year11month	Laryngeal obstruction	Respiratory pathogens nucleic acid six	2023/10/24 14:25:00									Negative(-)		Negative(-)		Negative(-)		Negative(-)		Negative(-)		Negative(-)
male	Throat swab	8year5month	Acute bronchitis	Respiratory pathogens nucleic acid six	2023/10/24 15:43:00									Negative(-)		Negative(-)		Negative(-)		Negative(-)		positive(+）	↑	positive(+)	↑
female	Throat swab	1year3month	Acute laryngitis	Respiratory pathogens nucleic acid six	2023/10/24 16:00:00									Negative(-)		Negative(-)		positive(+）	↑	Negative(-)		Negative(-)		Negative(-)
male	sputum	2month27day	pneumonia	Respiratory bacterial nucleic acid six	2023/10/24 16:24:00																					Negative(-)		Negative(-)		Negative(-)		Negative(-)		Negative(-)		Negative(-)
male	Throat swab	2month27day	pneumonia	Respiratory pathogens nucleic acid six	2023/10/24 16:24:00									Negative(-)		Negative(-)		Negative(-)		Negative(-)		Negative(-)		Negative(-)
female	sputum	6month17day	pneumonia	Respiratory bacterial nucleic acid six	2023/10/24 16:42:00																					Negative(-)		Negative(-)		Negative(-)		Negative(-)		Negative(-)		positive(+）	↑
female	Throat swab	6month17day	pneumonia	Respiratory pathogens nucleic acid six	2023/10/24 16:42:00									Negative(-)		Negative(-)		Negative(-)		Negative(-)		Negative(-)		Negative(-)
female	Throat swab	1year1month	Asthmatic bronchuspneumonia	Respiratory pathogens nucleic acid six	2023/10/24 16:55:00									Negative(-)		Negative(-)		Negative(-)		Negative(-)		Negative(-)		Negative(-)
male	Throat swab	6month21day	Acute bronchitis	Respiratory pathogens nucleic acid six	2023/10/24 19:21:00									Negative(-)		Negative(-)		Negative(-)		Negative(-)		Negative(-)		Negative(-)
female	sputum	1year1month	pneumonia	Respiratory bacterial nucleic acid six	2023/10/24 19:23:00																					Negative(-)		Negative(-)		Negative(-)		positive(+）	↑	Negative(-)		positive(+）	↑
female	Throat swab	1year1month	pneumonia	Respiratory pathogens nucleic acid six	2023/10/24 19:23:00									Negative(-)		Negative(-)		Negative(-)		Negative(-)		Negative(-)		positive(+)	↑
male	Throat swab	4year1month	pneumonia	Respiratory pathogens nucleic acid six	2023/10/24 20:19:00									Negative(-)		Negative(-)		Negative(-)		Negative(-)		positive(+）	↑	Negative(-)
male	Throat swab	4year9month	Acute laryngotracheitis	Respiratory pathogens nucleic acid six	2023/10/24 21:21:00									Negative(-)		Negative(-)		Negative(-)		Negative(-)		Negative(-)		Negative(-)
female	Throat swab	3year3month	fever	Respiratory pathogens nucleic acid six	2023/10/24 21:53:00									Negative(-)		Negative(-)		positive(+）	↑	Negative(-)		Negative(-)		Negative(-)
female	sputum	3year3month	pneumonia	Respiratory bacterial nucleic acid six	2023/10/24 21:53:00																					Negative(-)		Negative(-)		Negative(-)		positive(+）	↑	Negative(-)		positive(+）	↑
male	Throat swab	7year9month	Acute laryngotracheitis	Respiratory pathogens nucleic acid six	2023/10/24 22:13:00									Negative(-)		Negative(-)		Negative(-)		Negative(-)		Negative(-)		Negative(-)
female	Throat swab	5year	fever	Respiratory pathogens nucleic acid six	2023/10/24 22:43:00									Negative(-)		Negative(-)		Negative(-)		positive(+）	↑	Negative(-)		Negative(-)
female	sputum	5year	pneumonia	Respiratory bacterial nucleic acid six	2023/10/24 22:43:00																					Negative(-)		Negative(-)		Negative(-)		positive(+）	↑	Negative(-)		positive(+）	↑
male	Throat swab	3year5month	Acute bronchitis	Respiratory pathogens nucleic acid six	2023/10/24 23:04:00									Negative(-)		Negative(-)		Negative(-)		Negative(-)		positive(+）	↑	positive(+)	↑
male	Throat swab	1year9month	Febrile convulsion	Respiratory pathogens nucleic acid six	2023/10/24 23:25:00									Negative(-)		Negative(-)		Negative(-)		Negative(-)		Negative(-)		Negative(-)
male	Throat swab	3year7month	Acute laryngitis	Respiratory pathogens nucleic acid six	2023/10/24 3:21:00									Negative		Negative		Negative		Negative		Negative		Negative
female	Throat swab	1year11month	pneumonia	Respiratory pathogens nucleic acid six	2023/10/24 8:10:00									Negative(-)		Negative(-)		Negative(-)		Negative(-)		Negative(-)		Negative(-)
female	sputum	7year9month	Acute bronchitis	Respiratory bacterial nucleic acid six	2023/10/24 9:47:00																					Negative(-)		Negative(-)		Negative(-)		positive(+）	↑	Negative(-)		positive(+）	↑
female	Throat swab	7year9month	Acute bronchitis	Respiratory pathogens nucleic acid six	2023/10/24 9:47:00									Negative(-)		Negative(-)		Negative(-)		Negative(-)		positive(+）	↑	Negative(-)
male	sputum	8year8month	Acute upper respiratory tract infection	Respiratory bacterial nucleic acid six	2023/10/25 0:02:00																					Negative(-)		Negative(-)		Negative(-)		Negative(-)		Negative(-)		Negative(-)
male	Throat swab	8year8month	Acute upper respiratory tract infection	Respiratory pathogens nucleic acid six	2023/10/25 0:02:00									Negative(-)		Negative(-)		Negative(-)		Negative(-)		Negative(-)		positive(+)	↑
female	Throat swab	3year4month	fever	Respiratory pathogens nucleic acid six	2023/10/25 11:41:00									Negative(-)		Negative(-)		Negative(-)		Negative(-)		Negative(-)		Negative(-)
female	Throat swab	12year	Lobarpneumonia	Respiratory pathogens nucleic acid six	2023/10/25 11:46:00									Negative(-)		Negative(-)		Negative(-)		Negative(-)		Negative(-)		Negative(-)
male	sputum	3year6month	Acute bronchitis	Respiratory bacterial nucleic acid six	2023/10/25 11:54:00																					Negative(-)		Negative(-)		Negative(-)		positive(+）	↑	Negative(-)		positive(+）	↑
male	sputum	7month13day	Acute bronchitis	Respiratory bacterial nucleic acid six	2023/10/25 12:13:00																					Negative(-)		Negative(-)		positive(+）	↑	Negative(-)		Negative(-)		positive(+）	↑
male	Throat swab	7month13day	Acute bronchitis	Respiratory pathogens nucleic acid six	2023/10/25 12:13:00									Negative(-)		Negative(-)		positive(+）	↑	Negative(-)		Negative(-)		Negative(-)
male	Throat swab	3year6month	Acute bronchitis	Respiratory pathogens nucleic acid six	2023/10/25 12:25:00									Negative(-)		Negative(-)		Negative(-)		Negative(-)		Negative(-)		Negative(-)
female	sputum	5year2month	Acute bronchitis	Respiratory bacterial nucleic acid six	2023/10/25 13:20:00																					Negative(-)		Negative(-)		Negative(-)		positive(+）	↑	Negative(-)		Negative(-)
female	Throat swab	5year2month	Acute bronchitis	Respiratory pathogens nucleic acid six	2023/10/25 13:20:00									Negative(-)		Negative(-)		Negative(-)		Negative(-)		positive(+）	↑	Negative(-)
female	sputum	5year4month	Acute bronchitis	Respiratory bacterial nucleic acid six	2023/10/25 13:21:00																					Negative(-)		Negative(-)		Negative(-)		Negative(-)		Negative(-)		Negative(-)
female	Throat swab	5year4month	Acute bronchitis	Respiratory pathogens nucleic acid six	2023/10/25 13:21:00									Negative(-)		Negative(-)		Negative(-)		Negative(-)		Negative(-)		Negative(-)
female	Throat swab	8year5month	bronchuspneumonia	Respiratory pathogens nucleic acid six	2023/10/25 13:22:00									Negative(-)		Negative(-)		Negative(-)		Negative(-)		Negative(-)		Negative(-)
female	Throat swab	2year5month	Asthmatic bronchuspneumonia	Respiratory pathogens nucleic acid six	2023/10/25 13:51:00									Negative(-)		Negative(-)		positive(+）	↑	Negative(-)		Negative(-)		positive(+)	↑
male	Throat swab	3year3month	pneumonia	Respiratory pathogens nucleic acid six	2023/10/25 14:28:00									Negative(-)		Negative(-)		positive(+）	↑	Negative(-)		Negative(-)		Negative(-)
male	sputum	6month10day	Acute bronchitis	Respiratory bacterial nucleic acid six	2023/10/25 15:22:00																					Negative(-)		Negative(-)		Negative(-)		Negative(-)		Negative(-)		Negative(-)
male	Throat swab	6month10day	Acute bronchitis	Respiratory pathogens nucleic acid six	2023/10/25 15:22:00									Negative(-)		Negative(-)		Negative(-)		Negative(-)		Negative(-)		Negative(-)
male	sputum	6month29day	Acute bronchitis	Respiratory bacterial nucleic acid six	2023/10/25 15:54:00																					Negative(-)		Negative(-)		Negative(-)		positive(+）	↑	Negative(-)		Negative(-)
male	Throat swab	6month29day	Acute bronchitis	Respiratory pathogens nucleic acid six	2023/10/25 15:54:00									Negative(-)		Negative(-)		Negative(-)		Negative(-)		Negative(-)		Negative(-)
male	Throat swab	9month1day	fever	Respiratory pathogens nucleic acid six	2023/10/25 16:20:00									Negative(-)		Negative(-)		Negative(-)		Negative(-)		positive(+）	↑	Negative(-)
male	Throat swab	7year7month	pneumonia	Respiratory pathogens nucleic acid six	2023/10/25 16:20:00									Negative(-)		Negative(-)		Negative(-)		Negative(-)		Negative(-)		positive(+)	↑
female	Throat swab	6year7month	pneumonia	Respiratory pathogens nucleic acid six	2023/10/25 16:40:00									Negative(-)		Negative(-)		Negative(-)		Negative(-)		Negative(-)		positive(+)	↑
male	sputum	1year	pneumonia	Respiratory bacterial nucleic acid six	2023/10/25 16:45:00																					Negative(-)		Negative(-)		Negative(-)		Negative(-)		Negative(-)		Negative(-)
male	Throat swab	1year	pneumonia	Respiratory pathogens nucleic acid six	2023/10/25 16:45:00									Negative(-)		Negative(-)		Negative(-)		Negative(-)		Negative(-)		Negative(-)
male	Throat swab	5year5month	Unexplained convulsion	Respiratory pathogens nucleic acid six	2023/10/25 16:59:00									Negative(-)		Negative(-)		Negative(-)		Negative(-)		positive(+）	↑	Negative(-)
male	sputum	10month24day	Acute laryngitis	Respiratory bacterial nucleic acid six	2023/10/25 17:14:00																					Negative(-)		Negative(-)		Negative(-)		Negative(-)		Negative(-)		Negative(-)
male	Throat swab	10month24day	Acute laryngitis	Respiratory pathogens nucleic acid six	2023/10/25 17:14:00									Negative(-)		Negative(-)		Negative(-)		Negative(-)		Negative(-)		Negative(-)
male	Throat swab	1year6month	acuteAsthmatic bronchus	Respiratory pathogens nucleic acid six	2023/10/25 17:36:00									Negative(-)		Negative(-)		Negative(-)		positive(+）	↑	Negative(-)		Negative(-)
male	Throat swab	10year5month	Acute bronchitis	Respiratory pathogens nucleic acid six	2023/10/25 18:10:00									Negative(-)		Negative(-)		Negative(-)		Negative(-)		Negative(-)		positive(+)	↑
male	Throat swab	10year6month	Acute bronchitis	Respiratory pathogens nucleic acid six	2023/10/25 18:25:00									Negative(-)		Negative(-)		Negative(-)		Negative(-)		Negative(-)		Negative(-)
male	Throat swab	3month19day	Acute bronchitis	Respiratory pathogens nucleic acid six	2023/10/25 18:27:00									Negative(-)		Negative(-)		positive(+）	↑	Negative(-)		Negative(-)		Negative(-)
male	Throat swab	3year7month	Acute bronchitis	Respiratory pathogens nucleic acid six	2023/10/25 18:36:00									Negative(-)		Negative(-)		Negative(-)		Negative(-)		Negative(-)		Negative(-)
female	sputum	11year6month	Acute bronchitis	Respiratory bacterial nucleic acid six	2023/10/25 19:58:00																					Negative(-)		Negative(-)		Negative(-)		Negative(-)		Negative(-)		Negative(-)
female	Throat swab	11year6month	Acute bronchitis	Respiratory pathogens nucleic acid six	2023/10/25 19:58:00									Negative(-)		Negative(-)		Negative(-)		Negative(-)		Negative(-)		Negative(-)
female	sputum	12year	Lobarpneumonia	Respiratory bacterial nucleic acid six	2023/10/25 20:07:00																					Negative(-)		Negative(-)		Negative(-)		Negative(-)		Negative(-)		Negative(-)
female	Throat swab	2year	pneumonia	Respiratory pathogens nucleic acid six	2023/10/25 20:11:00									Negative(-)		Negative(-)		Negative(-)		positive(+）	↑	Negative(-)		Negative(-)
female	Throat swab	3year1month	fever	Respiratory pathogens nucleic acid six	2023/10/25 21:50:00									Negative(-)		Negative(-)		Negative(-)		Negative(-)		Negative(-)		Negative(-)
female	Throat swab	9year9month	fever	Respiratory pathogens nucleic acid six	2023/10/25 4:31:00									Negative(-)		Negative(-)		Negative(-)		Negative(-)		Negative(-)		Negative(-)
female	Throat swab	3year9month	fever	Respiratory pathogens nucleic acid six	2023/10/25 8:15:00									Negative(-)		Negative(-)		Negative(-)		Negative(-)		Negative(-)		Negative(-)
male	sputum	1year4month	Asthmatic bronchuspneumonia	Respiratory bacterial nucleic acid six	2023/10/26 11:01:00																					Negative(-)		positive(+）	↑	Negative(-)		Negative(-)		Negative(-)		positive(+）	↑
male	Throat swab	1year4month	Asthmatic bronchuspneumonia	Respiratory pathogens nucleic acid six	2023/10/26 11:01:00									Negative		Negative		Negative		Negative		Negative		Negative
male	Throat swab	10day15hour	newborn病理性黄疸	Respiratory pathogens nucleic acid six	2023/10/26 11:12:00									Negative		Negative		Negative		Negative		Negative		Negative
male	Throat swab	1year9month	fever	Respiratory pathogens nucleic acid six	2023/10/26 11:13:00									Negative		Negative		Negative		Negative		Negative		Negative
female	Throat swab	3year9month	pneumonia	Respiratory pathogens nucleic acid six	2023/10/26 11:57:00									Negative		Negative		positive	↑	Negative		positive	↑	Negative
female	Throat swab	2year1month	Acute laryngitis	Respiratory pathogens nucleic acid six	2023/10/26 12:21:00									Negative		Negative		Negative		Negative		Negative		positive	↑
female	Throat swab	1year	Asthmatic bronchuspneumonia	Respiratory pathogens nucleic acid six	2023/10/26 13:00:00									Negative		Negative		positive	↑	Negative		positive	↑	Negative
male	sputum	6year	Acute bronchitis	Respiratory bacterial nucleic acid six	2023/10/26 14:43:00																					Negative(-)		Negative(-)		Negative(-)		Negative(-)		Negative(-)		positive(+）	↑
male	Throat swab	6year	Acute bronchitis	Respiratory pathogens nucleic acid six	2023/10/26 14:43:00									Negative		Negative		Negative		positive	↑	Negative		Negative
female	Throat swab	5year	pneumonia	Respiratory pathogens nucleic acid six	2023/10/26 15:18:00									Negative		Negative		Negative		Negative		Negative		positive	↑
male	Throat swab	5year4month	pneumonia	Respiratory pathogens nucleic acid six	2023/10/26 15:58:00									Negative		Negative		positive	↑	Negative		Negative		Negative
female	Throat swab	3year10month	bronchuspneumonia	Respiratory pathogens nucleic acid six	2023/10/26 16:19:00									Negative		Negative		Negative		Negative		positive	↑	positive	↑
female	sputum	12year	Lobarpneumonia	Respiratory bacterial nucleic acid six	2023/10/26 16:53:00																					Negative(-)		Negative(-)		Negative(-)		positive(+）	↑	Negative(-)		positive(+）	↑
female	Throat swab	12year	Lobarpneumonia	Respiratory pathogens nucleic acid six	2023/10/26 16:53:00									Negative		Negative		Negative		Negative		Negative		positive	↑
male	sputum	2year4month	pneumonia	Respiratory bacterial nucleic acid six	2023/10/26 16:54:00																					Negative(-)		Negative(-)		Negative(-)		positive(+）	↑	Negative(-)		positive(+）	↑
male	Throat swab	2year4month	pneumonia	Respiratory pathogens nucleic acid six	2023/10/26 16:54:00									Negative		Negative		Negative		Negative		Negative		Negative
female	Throat swab	8month1day	pneumonia	Respiratory pathogens nucleic acid six	2023/10/26 17:05:00									Negative		Negative		positive	↑	Negative		Negative		Negative
female	Throat swab	3year8month	Febrile convulsion	Respiratory pathogens nucleic acid six	2023/10/26 17:31:00									Negative		Negative		positive	↑	Negative		Negative		Negative
female	Throat swab	1year2month	Acute upper respiratory tract infection	Respiratory pathogens nucleic acid six	2023/10/26 17:50:00									Negative		Negative		Negative		Negative		Negative		Negative
female	Throat swab	13year	fever	Respiratory pathogens nucleic acid six	2023/10/26 18:26:00									Negative		Negative		Negative		Negative(-)		Negative		Negative
male	Throat swab	1year3month	Febrile convulsion	Respiratory pathogens nucleic acid six	2023/10/26 18:48:00									Negative		Negative		Negative		Negative		Negative		Negative
female	Throat swab	1year8month	Unexplained convulsion	Respiratory pathogens nucleic acid six	2023/10/26 19:54:00									Negative		Negative		Negative		Negative		Negative		Negative
male	sputum	4month29day	Asthmatic bronchuspneumonia	Respiratory bacterial nucleic acid six	2023/10/26 20:46:00																					Negative(-)		Negative(-)		Negative(-)		positive(+）	↑	Negative(-)		positive(+）	↑
male	Throat swab	4month29day	Asthmatic bronchuspneumonia	Respiratory pathogens nucleic acid six	2023/10/26 20:46:00									Negative		Negative		Negative		Negative		Negative		Negative
female	sputum	8month20day	bronchuspneumonia	Respiratory bacterial nucleic acid six	2023/10/26 21:23:00																					Negative(-)		Negative(-)		Negative(-)		Negative(-)		Negative(-)		positive(+）	↑
female	Throat swab	8month20day	bronchuspneumonia	Respiratory pathogens nucleic acid six	2023/10/26 21:23:00									Negative		Negative		Negative		Negative		Negative		Negative
female	sputum	5month7day	Acute laryngotracheitis	Respiratory bacterial nucleic acid six	2023/10/26 9:14:00																					Negative(-)		Negative(-)		Negative(-)		Negative(-)		Negative(-)		positive(+）	↑
female	Throat swab	5month7day	Acute laryngotracheitis	Respiratory pathogens nucleic acid six	2023/10/26 9:14:00									positive(+）	↑	Negative(-)		Negative(-)		Negative(-)		positive(+）	↑	Negative(-)
male	Throat swab	4year9month	Acute bronchitis	Respiratory pathogens nucleic acid six	2023/10/26 9:50:00									Negative(-)		Negative(-)		Negative(-)		Negative(-)		Negative(-)		Negative(-)
female	Throat swab	4year11month	Acute laryngitis	Respiratory pathogens nucleic acid six	2023/10/27 0:22:00									Negative		Negative		Negative		Negative		Negative		Negative
male	Throat swab	6year6month	fever	Respiratory pathogens nucleic acid six	2023/10/27 0:25:00									Negative		Negative		Negative		Negative		positive	↑	Negative
male	Throat swab	2year8month	fever	Respiratory pathogens nucleic acid six	2023/10/27 0:41:00									Negative		Negative		Negative		Negative		Negative		Negative
male	sputum	1year1month	severe casepneumonia	Respiratory bacterial nucleic acid six	2023/10/27 1:42:00																					Negative(-)		Negative(-)		Negative(-)		positive(+）	↑	Negative(-)		positive(+）	↑
male	Throat swab	1year1month	severe casepneumonia	Respiratory pathogens nucleic acid six	2023/10/27 1:42:00									Negative(-)		Negative(-)		Negative(-)		Negative(-)		Negative(-)		Negative(-)
female	Throat swab	11month	acuteAsthmatic bronchus	Respiratory pathogens nucleic acid six	2023/10/27 10:42:00									Negative		Negative		positive	↑	Negative		Negative		Negative
female	sputum	11month1day	Asthmatic bronchus	Respiratory bacterial nucleic acid six	2023/10/27 10:42:00																					Negative(-)		Negative(-)		Negative(-)		positive(+）	↑	Negative(-)		positive(+）	↑
female	sputum	9month22day	bronchuspneumonia	Respiratory bacterial nucleic acid six	2023/10/27 11:18:00																					Negative(-)		Negative(-)		Negative(-)		Negative(-)		Negative(-)		positive(+）	↑
female	Throat swab	9month20day	bronchuspneumonia	Respiratory pathogens nucleic acid six	2023/10/27 11:18:00									Negative		Negative		positive	↑	Negative		Negative		positive	↑
male	Throat swab	2year7month	Acute upper respiratory tract infection	Respiratory pathogens nucleic acid six	2023/10/27 11:43:00									Negative		Negative		positive	↑	Negative		Negative		Negative
male	Throat swab	2year6month	Asthmatic bronchuspneumonia	Respiratory pathogens nucleic acid six	2023/10/27 11:50:00									Negative		Negative		positive	↑	Negative		Negative		Negative
female	sputum	10month17day	pneumonia	Respiratory bacterial nucleic acid six	2023/10/27 13:04:00																					Negative(-)		Negative(-)		Negative(-)		positive(+）	↑	Negative(-)		positive(+）	↑
female	Throat swab	10month17day	pneumonia	Respiratory pathogens nucleic acid six	2023/10/27 13:04:00									Negative		Negative		positive	↑	Negative		Negative		Negative
male	Throat swab	4year8month	fever	Respiratory pathogens nucleic acid six	2023/10/27 13:07:00									Negative		Negative		Negative		Negative		Negative		Negative
male	Throat swab	3year6month	bronchuspneumonia	Respiratory pathogens nucleic acid six	2023/10/27 13:08:00									Negative		Negative		Negative		Negative		Negative		Negative
female	Throat swab	10year8month	pneumoniapneumonia	Respiratory pathogens nucleic acid six	2023/10/27 13:19:00									Negative		Negative		positive	↑	Negative		Negative		positive	↑
male	sputum	3year10month	Acute bronchitis	Respiratory bacterial nucleic acid six	2023/10/27 13:29:00																					Negative(-)		Negative(-)		Negative(-)		positive(+）	↑	Negative(-)		Negative(-)
male	Throat swab	3year10month	Acute bronchitis	Respiratory pathogens nucleic acid six	2023/10/27 13:29:00									Negative		Negative		positive	↑	Negative		Negative		Negative
female	sputum	3year6month	Acute bronchitis	Respiratory bacterial nucleic acid six	2023/10/27 15:42:00																					Negative(-)		Negative(-)		Negative(-)		Negative(-)		Negative(-)		positive(+）	↑
female	Throat swab	3year6month	Acute bronchitis	Respiratory pathogens nucleic acid six	2023/10/27 15:42:00									Negative		Negative		positive	↑	Negative		Negative(-)		Negative
male	Throat swab	6year5month	Acute bronchitis	Respiratory pathogens nucleic acid six	2023/10/27 15:52:00									Negative		Negative		Negative		Negative		Negative		positive	↑
male	Throat swab	1year9month	fever	Respiratory pathogens nucleic acid six	2023/10/27 16:12:00									Negative		Negative		Negative		Negative		Negative		Negative
male	Throat swab	2year10month	Lobarpneumonia	Respiratory pathogens nucleic acid six	2023/10/27 16:36:00									Negative		Negative		Negative		Negative		Negative		Negative
female	sputum	3year9month	pneumonia	Respiratory bacterial nucleic acid six	2023/10/27 16:57:00																					Negative(-)		Negative(-)		Negative(-)		positive(+）	↑	Negative(-)		Negative(-)
female	Throat swab	3year9month	pneumonia	Respiratory pathogens nucleic acid six	2023/10/27 16:57:00									Negative		Negative		Negative		Negative		Negative		Negative
male	Throat swab	1year4month	Infantile diarrhea	Respiratory pathogens nucleic acid six	2023/10/27 17:40:00									Negative		Negative		Negative		Negative		positive	↑	Negative
male	sputum	11year11month	Acute bronchitis	Respiratory bacterial nucleic acid six	2023/10/27 17:41:00																					Negative(-)		Negative(-)		Negative(-)		positive(+）	↑	Negative(-)		Negative(-)
male	Throat swab	11year11month	Acute bronchitis	Respiratory pathogens nucleic acid six	2023/10/27 17:41:00									Negative		Negative		Negative		Negative		Negative		positive	↑
male	sputum	4month11day	pneumonia	Respiratory bacterial nucleic acid six	2023/10/27 18:14:00																					Negative(-)		Negative(-)		Negative(-)		Negative(-)		Negative(-)		positive(+）	↑
male	Throat swab	4month9day	pneumonia	Respiratory pathogens nucleic acid six	2023/10/27 18:14:00									Negative		Negative		positive	↑	Negative		Negative		Negative
female	sputum	3year11month	Acute bronchitis	Respiratory bacterial nucleic acid six	2023/10/27 18:25:00																					Negative(-)		Negative(-)		Negative(-)		positive(+）	↑	Negative(-)		positive(+）	↑
female	Throat swab	3year11month	Acute bronchitis	Respiratory pathogens nucleic acid six	2023/10/27 18:25:00									Negative		Negative		Negative		Negative		Negative		Negative
female	sputum	7month	pneumonia	Respiratory bacterial nucleic acid six	2023/10/27 18:54:00																					Negative(-)		Negative(-)		Negative(-)		Negative(-)		Negative(-)		positive(+）	↑
female	Throat swab	6month29day	pneumonia	Respiratory pathogens nucleic acid six	2023/10/27 18:54:00									Negative		Negative		positive	↑	Negative		Negative		Negative
female	Throat swab	10year6month	pneumonia	Respiratory pathogens nucleic acid six	2023/10/27 21:30:00									Negative		Negative		Negative		Negative		Negative		positive	↑
male	Throat swab	1year8month	pneumonia	Respiratory pathogens nucleic acid six	2023/10/27 22:34:00									Negative		Negative		positive	↑	Negative		Negative		Negative
female	Throat swab	4year	pneumonia	Respiratory pathogens nucleic acid six	2023/10/27 23:23:00									Negative		Negative		Negative		positive	↑	Negative		Negative
female	sputum	3year7month	Acute laryngotracheitis	Respiratory bacterial nucleic acid six	2023/10/27 6:58:00																					positive(+）	↑	Negative(-)		Negative(-)		positive(+）	↑	Negative(-)		positive(+）	↑
female	Throat swab	3year7month	Acute laryngotracheitis	Respiratory pathogens nucleic acid six	2023/10/27 6:58:00									Negative		Negative		Negative		Negative		Negative		Negative
female	Throat swab	2year6month	pneumonia	Respiratory pathogens nucleic acid six	2023/10/27 8:51:00									Negative		Negative		Negative		Negative		positive	↑	Negative
male	sputum	4year9month	Acute laryngotracheitis	Respiratory bacterial nucleic acid six	2023/10/27 8:59:00																					Negative(-)		Negative(-)		Negative(-)		positive(+）	↑	Negative(-)		positive(+）	↑
female	sputum	11month17day	pneumonia	Respiratory bacterial nucleic acid six	2023/10/27 9:11:00																					Negative(-)		Negative(-)		Negative(-)		Negative(-)		Negative(-)		Negative(-)
female	Throat swab	11month17day	pneumonia	Respiratory pathogens nucleic acid six	2023/10/27 9:11:00									Negative		Negative		Negative		Negative		Negative		Negative
female	Throat swab	11year3month	fever	Respiratory pathogens nucleic acid six	2023/10/27 9:56:00									Negative		Negative		Negative		Negative		Negative		Negative
male	Throat swab	1year6month	Febrile convulsion	Respiratory pathogens nucleic acid six	2023/10/28 0:05:00									Negative		Negative		Negative		Negative		Negative		Negative
female	Throat swab	11month	Acute laryngitis	Respiratory pathogens nucleic acid six	2023/10/28 0:43:00									Negative		Negative		Negative		Negative		Negative		Negative
female	Throat swab	5year8month	fever	Respiratory pathogens nucleic acid six	2023/10/28 1:18:00									Negative		Negative		Negative		positive	↑	positive	↑	Negative
male	Throat swab	7year1month	Acute bronchitis	Respiratory pathogens nucleic acid six	2023/10/28 10:32:00									Negative		Negative		Negative		Negative		positive	↑	positive	↑
male	sputum	6month5day	Asthmatic bronchuspneumonia	Respiratory bacterial nucleic acid six	2023/10/28 11:28:00																					Negative(-)		Negative(-)		Negative(-)		positive(+）	↑	Negative(-)		positive(+）	↑
male	Throat swab	6month4day	Asthmatic bronchuspneumonia	Respiratory pathogens nucleic acid six	2023/10/28 11:28:00									Negative		Negative		Negative		Negative		Negative		Negative
female	Throat swab	11month29day	severe casepneumonia	Respiratory pathogens nucleic acid six	2023/10/28 12:58:00									Negative		Negative		Negative		Negative		Negative		Negative
male	sputum	7month19day	Asthmatic bronchuspneumonia	Respiratory bacterial nucleic acid six	2023/10/28 14:13:00																					Negative(-)		Negative(-)		Negative(-)		positive(+）	↑	Negative(-)		positive(+）	↑
male	Throat swab	7month19day	Asthmatic bronchuspneumonia	Respiratory pathogens nucleic acid six	2023/10/28 14:13:00									Negative		Negative		positive	↑	Negative		Negative		Negative
male	sputum	4month9day	pneumonia	Respiratory bacterial nucleic acid six	2023/10/28 15:22:00																					Negative(-)		Negative(-)		Negative(-)		Negative(-)		Negative(-)		Negative(-)
male	Throat swab	4month9day	pneumonia	Respiratory pathogens nucleic acid six	2023/10/28 15:22:00									Negative		Negative		positive	↑	Negative		positive	↑	Negative
male	sputum	4month26day	Asthmatic bronchuspneumonia	Respiratory bacterial nucleic acid six	2023/10/28 17:09:00																					Negative(-)		Negative(-)		Negative(-)		Negative(-)		Negative(-)		Negative(-)
male	Throat swab	4month25day	Asthmatic bronchuspneumonia	Respiratory pathogens nucleic acid six	2023/10/28 17:09:00									Negative		Negative		positive	↑	Negative		Negative		Negative
male	sputum	3year6month	Acute bronchitis	Respiratory bacterial nucleic acid six	2023/10/28 17:49:00																					Negative(-)		Negative(-)		Negative(-)		positive(+）	↑	Negative(-)		positive(+）	↑
male	Throat swab	3year6month	Acute bronchitis	Respiratory pathogens nucleic acid six	2023/10/28 17:49:00									Negative		Negative		Negative		Negative		positive	↑	Negative
male	Throat swab	2year	Acute bronchitis	Respiratory pathogens nucleic acid six	2023/10/28 19:43:00									Negative		Negative		Negative		positive	↑	positive	↑	Negative
female	Throat swab	3year8month	Unexplained convulsion	Respiratory pathogens nucleic acid six	2023/10/28 20:03:00									Negative		Negative		positive	↑	positive	↑	Negative		Negative
female	Throat swab	3year9month	Acute bronchitis	Respiratory pathogens nucleic acid six	2023/10/28 20:14:00									Negative		Negative		positive	↑	Negative		Negative		Negative
female	Throat swab	3year11month	Acute bronchitis	Respiratory pathogens nucleic acid six	2023/10/28 21:12:00									Negative		Negative		Negative		Negative		Negative		Negative
female	Throat swab	11year4month	dyspnea	Respiratory pathogens nucleic acid six	2023/10/28 21:58:00									Negative		Negative		Negative		Negative		positive	↑	Negative
male	Throat swab	5year7month	pneumonia	Respiratory pathogens nucleic acid six	2023/10/28 9:07:00									Negative		Negative		Negative		Negative		Negative		positive	↑
male	Throat swab	7year4month	bronchus	Respiratory pathogens nucleic acid six	2023/10/29 10:53:00									Negative		Negative		Negative		positive	↑	Negative		Negative
male	sputum	3year9month	Acute bronchitis	Respiratory bacterial nucleic acid six	2023/10/29 11:35:00																					Negative(-)		Negative(-)		Negative(-)		positive(+）	↑	Negative(-)		positive(+）	↑
male	Throat swab	3year9month	Acute bronchitis	Respiratory pathogens nucleic acid six	2023/10/29 11:35:00									Negative		Negative		Negative		positive	↑	Negative		Negative
female	Throat swab	3year1month	fever	Respiratory pathogens nucleic acid six	2023/10/29 11:49:00									Negative		Negative		Negative		Negative		Negative		Negative
male	Throat swab	8year1month	pneumonia	Respiratory pathogens nucleic acid six	2023/10/29 13:37:00									Negative		Negative		Negative		positive	↑	Negative		positive	↑
male	sputum	1month22day	Asthmatic bronchuspneumonia	Respiratory bacterial nucleic acid six	2023/10/29 13:48:00																					Negative(-)		Negative(-)		Negative(-)		Negative(-)		Negative(-)		Negative(-)
male	Throat swab	1month22day	Asthmatic bronchuspneumonia	Respiratory pathogens nucleic acid six	2023/10/29 13:48:00									Negative		Negative		positive	↑	Negative		Negative		Negative
male	sputum	3year3month	pneumonia	Respiratory bacterial nucleic acid six	2023/10/29 15:22:00																					Negative(-)		Negative(-)		Negative(-)		positive(+）	↑	Negative(-)		positive(+）	↑
male	Throat swab	3year3month	pneumonia	Respiratory pathogens nucleic acid six	2023/10/29 15:22:00									Negative		Negative		Negative		Negative		Negative		Negative
female	sputum	1year	Acute laryngotracheitis	Respiratory bacterial nucleic acid six	2023/10/29 15:47:00																					Negative(-)		Negative(-)		Negative(-)		Negative(-)		Negative(-)		Negative(-)
female	Throat swab	1year	Acute laryngotracheitis	Respiratory pathogens nucleic acid six	2023/10/29 15:47:00									Negative		Negative		Negative		Negative		positive	↑	Negative
female	sputum	8year6month	pneumonia	Respiratory bacterial nucleic acid six	2023/10/29 16:04:00																					Negative(-)		Negative(-)		Negative(-)		positive(+）	↑	Negative(-)		Negative(-)
female	Throat swab	8year6month	pneumonia	Respiratory pathogens nucleic acid six	2023/10/29 16:04:00									Negative		Negative		Negative		Negative		Negative		positive	↑
male	Throat swab	4year7month	fever	Respiratory pathogens nucleic acid six	2023/10/29 16:23:00									positive	↑	Negative		Negative		Negative		Negative		Negative
male	Throat swab	1year5month	Acute bronchitis	Respiratory pathogens nucleic acid six	2023/10/29 19:32:00									Negative		Negative		Negative		positive	↑	Negative		Negative
male	Throat swab	6month2day	Acute bronchitis	Respiratory pathogens nucleic acid six	2023/10/29 19:59:00									Negative		Negative		positive	↑	Negative		Negative		Negative
male	Throat swab	8year3month	pneumonia	Respiratory pathogens nucleic acid six	2023/10/29 2:58:00									Negative		Negative		Negative		Negative		Negative		positive	↑
male	sputum	3year3month	acuteAsthmatic bronchus	Respiratory bacterial nucleic acid six	2023/10/29 20:25:00																					Negative(-)		Negative(-)		Negative(-)		positive(+）	↑	Negative(-)		positive(+）	↑
male	Throat swab	3year3month	acuteAsthmatic bronchus	Respiratory pathogens nucleic acid six	2023/10/29 20:25:00									Negative		Negative		positive	↑	Negative		Negative		Negative
male	Throat swab	9month5day	severe casepneumonia	Respiratory pathogens nucleic acid six	2023/10/29 21:02:00									Negative		Negative		positive	↑	Negative		Negative		Negative
female	sputum	1year4month	pneumonia	Respiratory bacterial nucleic acid six	2023/10/29 21:46:00																					Negative(-)		Negative(-)		Negative(-)		positive(+）	↑	Negative(-)		positive(+）	↑
female	Throat swab	1year4month	pneumonia	Respiratory pathogens nucleic acid six	2023/10/29 21:46:00									Negative		Negative		positive	↑	Negative		Negative		Negative
male	Throat swab	1year4month	Acute laryngitis	Respiratory pathogens nucleic acid six	2023/10/29 3:33:00									Negative		Negative		Negative		positive	↑	Negative		Negative
male	sputum	2year6month	Acute bronchitis	Respiratory bacterial nucleic acid six	2023/10/29 8:53:00																					Negative(-)		Negative(-)		Negative(-)		positive(+）	↑	Negative(-)		Negative(-)
male	Throat swab	2year6month	Acute bronchitis	Respiratory pathogens nucleic acid six	2023/10/29 8:53:00									Negative		Negative		Negative		Negative		Negative		Negative
female	sputum	6year1month	bronchuspneumonia	Respiratory bacterial nucleic acid six	2023/10/29 9:02:00																					Negative(-)		Negative(-)		Negative(-)		Negative(-)		Negative(-)		Negative(-)
female	Throat swab	6year1month	bronchuspneumonia	Respiratory pathogens nucleic acid six	2023/10/29 9:02:00									Negative		Negative		Negative		Negative		Negative		positive	↑
female	Throat swab	1year	Infantile diarrhea	Respiratory pathogens nucleic acid six	2023/10/29 9:31:00									Negative		Negative		Negative		Negative		positive	↑	Negative
female	Throat swab	12year	Lobarpneumonia	Respiratory pathogens nucleic acid six	2023/10/3 10:58:00									Negative		Negative		Negative		Negative		Negative		positive	↑
female	Throat swab	11month7day	acuteAsthmatic bronchus	Respiratory pathogens nucleic acid six	2023/10/3 11:58:00									Negative		Negative		Negative		Negative		Negative		Negative
male	Throat swab	4month30day	pneumonia	Respiratory pathogens nucleic acid six	2023/10/3 12:49:00									Negative		Negative		positive	↑	Negative		Negative		Negative
female	Throat swab	4month5day	bronchuspneumonia	Respiratory pathogens nucleic acid six	2023/10/3 13:02:00									Negative		Negative		Negative		Negative		Negative		positive	↑
male	Throat swab	3month16day	Acute bronchitis	Respiratory pathogens nucleic acid six	2023/10/3 14:58:00									Negative		Negative		Negative		positive	↑	positive	↑	Negative
male	Throat swab	1month9day	pneumonia	Respiratory pathogens nucleic acid six	2023/10/3 17:29:00									Negative		Negative		Negative		Negative		positive	↑	Negative
female	Throat swab	7month15day	Asthmatic bronchuspneumonia	Respiratory pathogens nucleic acid six	2023/10/3 17:47:00									Negative		Negative		positive	↑	Negative		Negative		Negative
male	Throat swab	2year8month	Asthmatic bronchuspneumonia	Respiratory pathogens nucleic acid six	2023/10/3 18:14:00									Negative		Negative		Negative		Negative		Negative		positive	↑
male	Throat swab	3year3month	Acute upper respiratory tract infection	Respiratory pathogens nucleic acid six	2023/10/3 21:00:00									Negative		Negative		Negative		Negative		Negative		Negative
male	Throat swab	2year	Acute upper respiratory tract infection	Respiratory pathogens nucleic acid six	2023/10/3 23:11:00									Negative		Negative		Negative		Negative		Negative		Negative
female	Throat swab	11month4day	Acute laryngotracheitis	Respiratory pathogens nucleic acid six	2023/10/3 8:27:00									Negative		Negative		Negative		Negative		positive	↑	Negative
male	sputum	11day13hour	congenitalpneumonia	Respiratory bacterial nucleic acid six	2023/10/30 0:41:00																					Negative(-)		Negative(-)		Negative(-)		Negative(-)		Negative(-)		Negative(-)
male	Throat swab	11day13hour	congenitalpneumonia	Respiratory pathogens nucleic acid six	2023/10/30 0:41:00									Negative		Negative		positive	↑	Negative		Negative		Negative
female	sputum	10year9month	Acute upper respiratory tract infection	Respiratory bacterial nucleic acid six	2023/10/30 0:56:00																					Negative(-)		Negative(-)		Negative(-)		Negative(-)		Negative(-)		Negative(-)
female	Throat swab	10year9month	Acute upper respiratory tract infection	Respiratory pathogens nucleic acid six	2023/10/30 0:56:00									Negative		Negative		Negative		positive	↑	Negative		Negative
male	sputum	1year11month	pneumonia	Respiratory bacterial nucleic acid six	2023/10/30 1:21:00																					Negative(-)		Negative(-)		positive(+）	↑	Negative(-)		Negative(-)		positive(+）	↑
male	Throat swab	1year11month	pneumonia	Respiratory pathogens nucleic acid six	2023/10/30 1:21:00									Negative		Negative		positive	↑	Negative		positive	↑	Negative
female	Throat swab	5year3month	Acute bronchitis	Respiratory pathogens nucleic acid six	2023/10/30 10:37:00									Negative		Negative		Negative		Negative		Negative		positive	↑
male	sputum	4year4month	fever	Respiratory bacterial nucleic acid six	2023/10/30 10:42:00																					Negative(-)		Negative(-)		Negative(-)		positive(+）	↑	Negative(-)		positive(+）	↑
male	Throat swab	4year4month	fever	Respiratory pathogens nucleic acid six	2023/10/30 10:42:00									Negative		Negative		Negative		Negative		Negative		Negative
male	Throat swab	3year4month	bronchus	Respiratory pathogens nucleic acid six	2023/10/30 11:23:00									Negative		Negative		Negative		Negative		Negative		positive(+)	↑
male	sputum	1year1month	Acute laryngotracheitis	Respiratory bacterial nucleic acid six	2023/10/30 11:58:00																					Negative(-)		Negative(-)		Negative(-)		Negative(-)		Negative(-)		positive(+）	↑
male	Throat swab	1year1month	Acute laryngotracheitis	Respiratory pathogens nucleic acid six	2023/10/30 11:58:00									Negative		Negative		Negative		Negative		Negative		Negative
male	sputum	5year6month	pneumonia	Respiratory bacterial nucleic acid six	2023/10/30 12:29:00																					Negative(-)		Negative(-)		Negative(-)		positive(+）	↑	Negative(-)		Negative(-)
male	Throat swab	5year6month	pneumonia	Respiratory pathogens nucleic acid six	2023/10/30 12:29:00									Negative		Negative		Negative		Negative		positive	↑	positive	↑
female	sputum	4year10month	fever	Respiratory bacterial nucleic acid six	2023/10/30 12:40:00																					Negative(-)		Negative(-)		Negative(-)		positive(+）	↑	Negative(-)		positive(+）	↑
female	Throat swab	4year10month	fever	Respiratory pathogens nucleic acid six	2023/10/30 12:40:00									Negative		Negative		Negative		Negative		Negative		Negative
female	Throat swab	11year5month	Acute bronchitis	Respiratory pathogens nucleic acid six	2023/10/30 12:48:00									Negative		Negative		Negative		Negative		Negative		positive	↑
male	sputum	9year	bronchuspneumonia	Respiratory bacterial nucleic acid six	2023/10/30 12:50:00																					Negative(-)		Negative(-)		Negative(-)		positive(+）	↑	Negative(-)		Negative(-)
male	Throat swab	9year	bronchuspneumonia	Respiratory pathogens nucleic acid six	2023/10/30 12:50:00									Negative		Negative		Negative		Negative		Negative		positive	↑
male	Throat swab	4year5month	pneumonia	Respiratory pathogens nucleic acid six	2023/10/30 12:55:00									Negative		Negative		Negative		Negative		Negative		positive	↑
male	sputum	5year	Acute bronchitis	Respiratory bacterial nucleic acid six	2023/10/30 13:19:00																					Negative(-)		Negative(-)		Negative(-)		positive(+）	↑	Negative(-)		positive(+）	↑
male	Throat swab	5year	Acute bronchitis	Respiratory pathogens nucleic acid six	2023/10/30 13:19:00									Negative		Negative		Negative		positive	↑	positive	↑	Negative
male	sputum	3month7day	Acute laryngotracheitis	Respiratory bacterial nucleic acid six	2023/10/30 13:26:00																					Negative(-)		Negative(-)		Negative(-)		Negative(-)		Negative(-)		Negative(-)
male	Throat swab	3month7day	Acute laryngotracheitis	Respiratory pathogens nucleic acid six	2023/10/30 13:26:00									Negative		Negative		Negative		Negative		Negative		positive(+)	↑
male	sputum	6month16day	bronchuspneumonia	Respiratory bacterial nucleic acid six	2023/10/30 15:56:00																					Negative(-)		Negative(-)		Negative(-)		positive(+）	↑	Negative(-)		positive(+）	↑
male	Throat swab	6month16day	bronchuspneumonia	Respiratory pathogens nucleic acid six	2023/10/30 15:56:00									Negative		Negative		Negative		Negative		Negative		Negative
male	Throat swab	4month16day	Acute laryngitis	Respiratory pathogens nucleic acid six	2023/10/30 16:01:00									Negative		Negative		Negative		positive	↑	Negative		Negative
female	Throat swab	1year	pneumonia	Respiratory pathogens nucleic acid six	2023/10/30 16:10:00									Negative		Negative		positive	↑	Negative		Negative		Negative
female	Throat swab	11month1day	acuteAsthmatic bronchus	Respiratory pathogens nucleic acid six	2023/10/30 16:14:00									Negative		Negative		positive	↑	Negative		Negative		Negative
female	Throat swab	6year	acute肠	Respiratory pathogens nucleic acid six	2023/10/30 16:19:00									Negative		Negative		Negative		Negative		Negative		positive	↑
female	Throat swab	1year	Acute bronchitis	Respiratory pathogens nucleic acid six	2023/10/30 16:20:00									Negative		Negative		Negative		Negative		positive	↑	Negative
male	Throat swab	4year3month	pneumoniapneumonia	Respiratory pathogens nucleic acid six	2023/10/30 16:30:00									Negative		Negative		Negative		Negative		Negative(-)		positive	↑
female	Throat swab	5year6month	Acute bronchitis	Respiratory pathogens nucleic acid six	2023/10/30 16:36:00									Negative		Negative		Negative		Negative		Negative		Negative
female	Throat swab	10year1month	Acute bronchitis	Respiratory pathogens nucleic acid six	2023/10/30 16:39:00									Negative		Negative		Negative		Negative		Negative		positive	↑
male	sputum	1year	Acute laryngotracheitis	Respiratory bacterial nucleic acid six	2023/10/30 16:54:00																					Negative(-)		positive(+）	↑	Negative(-)		Negative(-)		Negative(-)		positive(+）	↑
male	Throat swab	1year	Acute laryngotracheitis	Respiratory pathogens nucleic acid six	2023/10/30 16:54:00									Negative		Negative		Negative		Negative		Negative		Negative
male	sputum	1year	Acute bronchitis	Respiratory bacterial nucleic acid six	2023/10/30 17:38:00																					Negative(-)		Negative(-)		Negative(-)		positive(+）	↑	Negative(-)		positive(+）	↑
male	Throat swab	1year	Acute bronchitis	Respiratory pathogens nucleic acid six	2023/10/30 17:38:00									Negative		Negative		Negative		Negative		Negative		Negative
male	sputum	3year10month	Acute bronchitis	Respiratory bacterial nucleic acid six	2023/10/30 18:01:00																					Negative(-)		Negative(-)		Negative(-)		positive(+）	↑	Negative(-)		Negative(-)
male	Throat swab	3year10month	Acute bronchitis	Respiratory pathogens nucleic acid six	2023/10/30 18:01:00									Negative		Negative		positive	↑	Negative		Negative		Negative
male	Throat swab	7year7month	bronchus	Respiratory pathogens nucleic acid six	2023/10/30 18:33:00									Negative		Negative		Negative		Negative		Negative(-)		positive	↑
male	Throat swab	8year1month	Lobarpneumonia	Respiratory pathogens nucleic acid six	2023/10/30 18:41:00									Negative		Negative		Negative		Negative		Negative		positive	↑
male	Throat swab	1year4month	acuteAsthmatic bronchus	Respiratory pathogens nucleic acid six	2023/10/30 21:18:00									Negative		Negative		positive	↑	Negative		positive	↑	Negative
male	Throat swab	10year3month	Acute bronchitis	Respiratory pathogens nucleic acid six	2023/10/30 21:27:00									Negative		Negative		Negative		Negative		Negative		positive	↑
female	sputum	8year8month	pneumonia	Respiratory bacterial nucleic acid six	2023/10/30 22:11:00																					Negative(-)		Negative(-)		Negative(-)		Negative(-)		Negative(-)		positive(+）	↑
female	Throat swab	8year8month	pneumonia	Respiratory pathogens nucleic acid six	2023/10/30 22:11:00									Negative		Negative		Negative		Negative		Negative		positive	↑
male	Throat swab	3year6month	pneumonia	Respiratory pathogens nucleic acid six	2023/10/30 23:07:00									Negative		Negative		positive	↑	Negative		Negative		Negative
female	Throat swab	2year11month	pneumonia	Respiratory pathogens nucleic acid six	2023/10/30 4:45:00									Negative		Negative		positive	↑	Negative		Negative		Negative
female	sputum	5month12day	Acute bronchitis	Respiratory bacterial nucleic acid six	2023/10/30 6:24:00																					Negative(-)		Negative(-)		Negative(-)		positive(+）	↑	Negative(-)		positive(+）	↑
female	Throat swab	5month12day	Acute bronchitis	Respiratory pathogens nucleic acid six	2023/10/30 6:24:00									Negative		Negative		Negative		Negative		Negative		Negative
female	Throat swab	13year	fever	Respiratory pathogens nucleic acid six	2023/10/30 8:55:00									Negative		Negative		Negative		positive	↑	Negative		Negative
female	Throat swab	5year	Acute bronchitis	Respiratory pathogens nucleic acid six	2023/10/30 9:19:00									Negative		Negative		Negative		Negative		positive	↑	positive(+)	↑
male	sputum	12year	Lobarpneumonia	Respiratory bacterial nucleic acid six	2023/10/31 1:12:00																					Negative(-)		Negative(-)		Negative(-)		positive(+）	↑	Negative(-)		Negative(-)
male	Throat swab	12year	Lobarpneumonia	Respiratory pathogens nucleic acid six	2023/10/31 1:12:00									Negative		Negative		Negative		Negative		Negative		positive	↑
female	sputum	5year10month	Acute bronchitis	Respiratory bacterial nucleic acid six	2023/10/31 10:22:00																					Negative(-)		Negative(-)		Negative(-)		Negative(-)		Negative(-)		positive(+）	↑
female	Throat swab	5year10month	Acute bronchitis	Respiratory pathogens nucleic acid six	2023/10/31 10:22:00									Negative		Negative		Negative		Negative		Negative		positive	↑
male	sputum	2year6month	pneumonia	Respiratory bacterial nucleic acid six	2023/10/31 10:57:00																					Negative(-)		Negative(-)		Negative(-)		positive(+）	↑	Negative(-)		positive(+）	↑
male	Throat swab	2year6month	pneumonia	Respiratory pathogens nucleic acid six	2023/10/31 10:57:00									Negative		Negative		Negative		Negative		Negative		Negative
male	Throat swab	6year3month	pneumonia	Respiratory pathogens nucleic acid six	2023/10/31 11:08:00									Negative		Negative		Negative		Negative(-)		positive	↑	Negative
female	Throat swab	11year11month	pneumoniapneumonia	Respiratory pathogens nucleic acid six	2023/10/31 11:23:00									Negative		Negative		Negative		Negative		Negative		positive	↑
female	sputum	4year3month	pneumonia	Respiratory bacterial nucleic acid six	2023/10/31 11:24:00																					Negative(-)		Negative(-)		Negative(-)		positive(+）	↑	Negative(-)		Negative(-)
female	Throat swab	4year3month	pneumonia	Respiratory pathogens nucleic acid six	2023/10/31 11:24:00									Negative		Negative		positive	↑	Negative		Negative		Negative
male	sputum	8year10month	fever	Respiratory bacterial nucleic acid six	2023/10/31 11:32:00																					Negative(-)		Negative(-)		Negative(-)		positive(+）	↑	Negative(-)		positive(+）	↑
male	Throat swab	8year10month	fever	Respiratory pathogens nucleic acid six	2023/10/31 11:32:00									Negative		Negative		Negative		Negative		Negative		positive	↑
female	sputum	5year9month	pneumonia	Respiratory bacterial nucleic acid six	2023/10/31 12:59:00																					positive(+）	↑	Negative(-)		Negative(-)		Negative(-)		Negative(-)		positive(+）	↑
female	Throat swab	5year9month	pneumonia	Respiratory pathogens nucleic acid six	2023/10/31 12:59:00									Negative		Negative		Negative		Negative		Negative		Negative
male	Throat swab	10year	pneumonia	Respiratory pathogens nucleic acid six	2023/10/31 13:22:00									Negative		Negative		Negative		Negative		Negative		positive	↑
female	Throat swab	2month28day	bronchuspneumonia	Respiratory pathogens nucleic acid six	2023/10/31 14:37:00									Negative		Negative		positive	↑	Negative		Negative		Negative
female	Throat swab	6year	bronchus	Respiratory pathogens nucleic acid six	2023/10/31 15:06:00									Negative		Negative		positive	↑	Negative		positive	↑	Negative
female	Throat swab	5year3month	pneumonia	Respiratory pathogens nucleic acid six	2023/10/31 15:11:00									Negative		Negative		Negative		Negative		Negative		Negative
female	sputum	7year10month	Acute bronchitis	Respiratory bacterial nucleic acid six	2023/10/31 16:06:00																					positive(+）	↑	Negative(-)		Negative(-)		Negative(-)		Negative(-)		Negative(-)
female	Throat swab	7year10month	Acute bronchitis	Respiratory pathogens nucleic acid six	2023/10/31 16:06:00									Negative		Negative		Negative		Negative		Negative		positive	↑
female	Throat swab	7year11month	Acute bronchitis	Respiratory pathogens nucleic acid six	2023/10/31 16:11:00									Negative		Negative		Negative		Negative		Negative		Negative
female	sputum	3year10month	pneumonia	Respiratory bacterial nucleic acid six	2023/10/31 16:29:00																					Negative(-)		Negative(-)		Negative(-)		positive(+）	↑	Negative(-)		positive(+）	↑
female	Throat swab	3year10month	pneumonia	Respiratory pathogens nucleic acid six	2023/10/31 16:29:00									Negative		Negative		positive	↑	Negative		Negative		Negative
male	Throat swab	2year1month	Acute bronchitis	Respiratory pathogens nucleic acid six	2023/10/31 16:48:00									Negative(-)		Negative(-)		Negative(-)		Negative(-)		positive(+）	↑	positive(+)	↑
female	sputum	7year4month	pneumonia	Respiratory bacterial nucleic acid six	2023/10/31 16:58:00																					Negative(-)		Negative(-)		Negative(-)		Negative(-)		Negative(-)		positive(+）	↑
female	Throat swab	7year4month	pneumonia	Respiratory pathogens nucleic acid six	2023/10/31 16:58:00									positive	↑	Negative		Negative		Negative		Negative		Negative
female	sputum	5year10month	Acute bronchitis	Respiratory bacterial nucleic acid six	2023/10/31 17:22:00																					Negative(-)		Negative(-)		positive(+）	↑	positive(+）	↑	Negative(-)		Negative(-)
female	Throat swab	5year10month	Acute bronchitis	Respiratory pathogens nucleic acid six	2023/10/31 17:22:00									Negative		Negative		Negative		positive	↑	Negative		Negative
male	sputum	6month5day	acuteAsthmatic bronchus	Respiratory bacterial nucleic acid six	2023/10/31 17:33:00																					Negative(-)		Negative(-)		Negative(-)		Negative(-)		Negative(-)		Negative(-)
male	Throat swab	6month5day	acuteAsthmatic bronchus	Respiratory pathogens nucleic acid six	2023/10/31 17:33:00									Negative		Negative		positive	↑	Negative		Negative		Negative
male	sputum	4year3month	Acute bronchitis	Respiratory bacterial nucleic acid six	2023/10/31 17:36:00																					Negative(-)		Negative(-)		Negative(-)		positive(+）	↑	Negative(-)		positive(+）	↑
male	Throat swab	4year3month	Acute bronchitis	Respiratory pathogens nucleic acid six	2023/10/31 17:36:00									Negative		Negative		Negative		Negative		Negative		positive	↑
male	Throat swab	8month20day	acuteAsthmatic bronchus	Respiratory pathogens nucleic acid six	2023/10/31 17:36:00									Negative		Negative		Negative		positive	↑	positive	↑	Negative
male	sputum	7year5month	Acute bronchitis	Respiratory bacterial nucleic acid six	2023/10/31 17:51:00																					Negative(-)		Negative(-)		Negative(-)		positive(+）	↑	Negative(-)		positive(+）	↑
male	Throat swab	7year5month	Acute bronchitis	Respiratory pathogens nucleic acid six	2023/10/31 17:51:00									Negative		Negative		Negative		Negative		Negative		Negative
female	Throat swab	12year	pneumonia	Respiratory pathogens nucleic acid six	2023/10/31 17:52:00									Negative		Negative		Negative		Negative		Negative		positive	↑
female	Throat swab	1month6day	pneumonia	Respiratory pathogens nucleic acid six	2023/10/31 18:02:00									Negative		Negative		positive	↑	Negative		Negative		Negative
female	sputum	4year6month	Acute bronchitis	Respiratory bacterial nucleic acid six	2023/10/31 18:13:00																					Negative(-)		Negative(-)		positive(+）	↑	positive(+）	↑	Negative(-)		positive(+）	↑
female	Throat swab	4year6month	Acute bronchitis	Respiratory pathogens nucleic acid six	2023/10/31 18:13:00									Negative		Negative		Negative		Negative		Negative		Negative
female	Throat swab	5year9month	pneumoniapneumonia	Respiratory pathogens nucleic acid six	2023/10/31 18:16:00									Negative(-)		Negative(-)		Negative(-)		Negative(-)		positive(+）	↑	positive(+)	↑
male	sputum	1year6month	Acute upper respiratory tract infection	Respiratory bacterial nucleic acid six	2023/10/31 18:47:00																					Negative(-)		Negative(-)		positive(+）	↑	positive(+）	↑	Negative(-)		positive(+）	↑
male	Throat swab	1year6month	Acute upper respiratory tract infection	Respiratory pathogens nucleic acid six	2023/10/31 18:47:00									Negative		Negative		Negative		positive	↑	Negative		Negative
male	sputum	3year7month	Acute bronchitis	Respiratory bacterial nucleic acid six	2023/10/31 19:34:00																					Negative(-)		Negative(-)		Negative(-)		Negative(-)		Negative(-)		positive(+）	↑
male	Throat swab	3year7month	Acute bronchitis	Respiratory pathogens nucleic acid six	2023/10/31 19:34:00									Negative		Negative		positive	↑	Negative		Negative		Negative
male	Throat swab	2year3month	fever	Respiratory pathogens nucleic acid six	2023/10/31 19:50:00									positive	↑	Negative		Negative		Negative		Negative		Negative
female	Throat swab	4year3month	Acute upper respiratory tract infection	Respiratory pathogens nucleic acid six	2023/10/31 19:56:00									Negative		Negative		Negative		Negative		positive	↑	Negative
male	sputum	10year7month	Acute bronchitis	Respiratory bacterial nucleic acid six	2023/10/31 2:09:00																					Negative(-)		Negative(-)		Negative(-)		positive(+）	↑	Negative(-)		Negative(-)
male	Throat swab	10year7month	Acute bronchitis	Respiratory pathogens nucleic acid six	2023/10/31 2:09:00									Negative		Negative		Negative		Negative		Negative		positive	↑
male	sputum	3year3month	Laryngeal obstruction	Respiratory bacterial nucleic acid six	2023/10/31 20:00:00																					Negative(-)		Negative(-)		Negative(-)		positive(+）	↑	Negative(-)		positive(+）	↑
male	Throat swab	3year3month	Laryngeal obstruction	Respiratory pathogens nucleic acid six	2023/10/31 20:00:00									Negative		Negative		Negative		Negative		Negative		Negative
male	Throat swab	3year9month	bronchuspneumonia	Respiratory pathogens nucleic acid six	2023/10/31 21:43:00									Negative		Negative		Negative		Negative		positive	↑	Negative
male	Throat swab	10year10month	fever	Respiratory pathogens nucleic acid six	2023/10/31 22:01:00									Negative		Negative		Negative		Negative		Negative		Negative
male	sputum	10month12day	Asthmatic bronchuspneumonia	Respiratory bacterial nucleic acid six	2023/10/31 5:24:00																					Negative(-)		Negative(-)		Negative(-)		positive(+）	↑	Negative(-)		positive(+）	↑
male	Throat swab	10month12day	Asthmatic bronchuspneumonia	Respiratory pathogens nucleic acid six	2023/10/31 5:24:00									Negative(-)		Negative(-)		positive(+）	↑	Negative(-)		Negative(-)		Negative(-)
female	Throat swab	6year10month	Community acquisitionpneumonia，非severe case	Respiratory pathogens nucleic acid six	2023/10/31 9:33:00									Negative		Negative		Negative		Negative		Negative		positive	↑
female	sputum	6year10month	pneumonia	Respiratory bacterial nucleic acid six	2023/10/31 9:33:00																					Negative(-)		Negative(-)		Negative(-)		positive(+）	↑	Negative(-)		positive(+）	↑
female	Throat swab	1month29day	Acute upper respiratory tract infection	Respiratory pathogens nucleic acid six	2023/10/4 0:48:00									Negative		Negative		Negative		Negative		Negative		Negative
male	Throat swab	11month14day	Asthmatic bronchuspneumonia	Respiratory pathogens nucleic acid six	2023/10/4 11:24:00									Negative		Negative		Negative		positive	↑	positive	↑	Negative
female	Throat swab	2year9month	pneumonia	Respiratory pathogens nucleic acid six	2023/10/4 11:56:00									Negative		Negative		Negative		Negative		Negative		Negative
male	Throat swab	6month	pneumonia	Respiratory pathogens nucleic acid six	2023/10/4 12:42:00									Negative		Negative		Negative		Negative		Negative		Negative
male	Throat swab	5year4month	acuteAsthmatic bronchus	Respiratory pathogens nucleic acid six	2023/10/4 8:45:00									Negative		Negative		Negative		Negative		Negative		Negative
male	sputum	5year4month	acuteAsthmatic bronchus	Respiratory bacterial nucleic acid six	2023/10/4 8:46:00																					Negative(-)		Negative(-)		Negative(-)		Negative(-)		Negative(-)		positive(+）	↑
male	Throat swab	6month2day	pneumonia	Respiratory pathogens nucleic acid six	2023/10/5 10:18:00									Negative		Negative		Negative		Negative		Negative		Negative
male	Throat swab	5year9month	bronchusasthma(acuteStage of attack)	Respiratory pathogens nucleic acid six	2023/10/5 10:27:00									Negative		Negative		Negative		Negative		Negative		Negative
male	sputum	2month13day	pneumonia	Respiratory bacterial nucleic acid six	2023/10/5 10:37:00																					positive(+）	↑	Negative(-)		positive(+）	↑	Negative(-)		Negative(-)		positive(+）	↑
male	Throat swab	2month13day	pneumonia	Respiratory pathogens nucleic acid six	2023/10/5 10:37:00									Negative		Negative		Negative		Negative		Negative		Negative
male	sputum	7year3month	fever	Respiratory bacterial nucleic acid six	2023/10/5 10:56:00																					Negative(-)		Negative(-)		Negative(-)		positive(+）	↑	Negative(-)		positive(+）	↑
male	Throat swab	7year3month	fever	Respiratory pathogens nucleic acid six	2023/10/5 10:56:00									Negative		Negative		Negative		positive	↑	Negative		Negative
female	Throat swab	9month21day	Acute laryngitis	Respiratory pathogens nucleic acid six	2023/10/5 11:27:00									Negative		Negative		Negative		Negative		Negative		Negative
male	Throat swab	1year2month	acuteAsthmatic bronchus	Respiratory pathogens nucleic acid six	2023/10/5 12:02:00									Negative		Negative		Negative		Negative		Negative		Negative
male	Throat swab	2year10month	Unexplained convulsion	Respiratory pathogens nucleic acid six	2023/10/5 13:05:00									Negative		Negative		Negative		Negative		Negative		Negative
male	sputum	1year2month	pneumonia	Respiratory bacterial nucleic acid six	2023/10/5 17:12:00																					Negative(-)		Negative(-)		Negative(-)		Negative(-)		Negative(-)		positive(+）	↑
male	Throat swab	1year2month	pneumonia	Respiratory pathogens nucleic acid six	2023/10/5 17:12:00									Negative		Negative		Negative		Negative		Negative		Negative
male	sputum	1month29day	pneumonia	Respiratory bacterial nucleic acid six	2023/10/5 17:17:00																					positive(+）	↑	Negative(-)		Negative(-)		Negative(-)		Negative(-)		Negative(-)
male	Throat swab	1month29day	pneumonia	Respiratory pathogens nucleic acid six	2023/10/5 17:17:00									Negative		Negative		Negative		Negative		Negative		Negative
female	Throat swab	6year11month	pneumonia	Respiratory pathogens nucleic acid six	2023/10/5 17:26:00									Negative		Negative		Negative		Negative		Negative		positive	↑
female	Throat swab	1month14day	Acute bronchitis	Respiratory pathogens nucleic acid six	2023/10/5 18:06:00									Negative		Negative		Negative		Negative		Negative		Negative
male	Throat swab	3year8month	Unexplained convulsion	Respiratory pathogens nucleic acid six	2023/10/5 18:07:00									Negative		Negative		Negative		Negative		Negative		Negative
female	sputum	1month14day	Acute bronchitis	Respiratory bacterial nucleic acid six	2023/10/5 18:13:00																					Negative(-)		Negative(-)		positive(+）	↑	Negative(-)		Negative(-)		positive(+）	↑
female	Throat swab	3year3month	Acute bronchitis	Respiratory pathogens nucleic acid six	2023/10/5 18:44:00									Negative		Negative		Negative		Negative		Negative		Negative
female	sputum	3year4month	Acute bronchitis	Respiratory bacterial nucleic acid six	2023/10/5 19:42:00																					Negative(-)		Negative(-)		Negative(-)		positive(+）	↑	Negative(-)		Negative(-)
female	Throat swab	3year4month	Acute bronchitis	Respiratory pathogens nucleic acid six	2023/10/5 19:42:00									Negative		Negative		Negative		Negative		Negative		Negative
male	Throat swab	5year	Acute upper respiratory tract infection	Respiratory pathogens nucleic acid six	2023/10/5 20:40:00									Negative		Negative		Negative		Negative		Negative		Negative
female	Throat swab	1year6month	Unexplained convulsion	Respiratory pathogens nucleic acid six	2023/10/5 21:15:00									Negative		Negative		Negative		Negative		Negative		Negative
female	Throat swab	6year2month	fever	Respiratory pathogens nucleic acid six	2023/10/5 8:03:00									Negative		Negative		Negative		positive	↑	Negative		Negative
female	Throat swab	9month4day	Acute bronchitis	Respiratory pathogens nucleic acid six	2023/10/5 8:18:00									Negative		Negative		Negative		Negative		Negative		Negative
female	Throat swab	9month9day	Acute bronchitis	Respiratory pathogens nucleic acid six	2023/10/5 8:56:00									Negative		Negative		Negative		positive	↑	positive(+）	↑	Negative
male	Throat swab	4year7month	Childhood asthma	Respiratory pathogens nucleic acid six	2023/10/6 0:05:00									Negative		Negative		Negative		Negative		Negative		Negative
female	Throat swab	2year2month	acuteAsthmatic bronchus	Respiratory pathogens nucleic acid six	2023/10/6 11:11:00									Negative		Negative		Negative		Negative		Negative		positive	↑
female	Throat swab	3year5month	pneumonia	Respiratory pathogens nucleic acid six	2023/10/6 12:31:00									Negative		Negative		positive	↑	Negative		Negative		Negative
male	Throat swab	3month8day	pneumonia	Respiratory pathogens nucleic acid six	2023/10/6 12:36:00									Negative		Negative		Negative		Negative		Negative		Negative
female	Throat swab	2year11month	dyspnea	Respiratory pathogens nucleic acid six	2023/10/6 14:17:00									Negative		Negative		Negative		Negative		Negative		Negative
male	Throat swab	2year11month	Acute upper respiratory tract infection	Respiratory pathogens nucleic acid six	2023/10/6 16:03:00									Negative		Negative		Negative		Negative		Negative		Negative
male	Throat swab	9month17day	acuteAsthmatic bronchus	Respiratory pathogens nucleic acid six	2023/10/6 16:21:00									Negative		Negative		Negative		Negative		Negative		Negative
male	sputum	27day8hour	newborn鼻塞	Respiratory bacterial nucleic acid six	2023/10/6 16:27:00																					Negative(-)		positive(+）	↑	positive(+）	↑	Negative(-)		Negative(-)		Negative(-)
male	Throat swab	27day8hour	newborn鼻塞	Respiratory pathogens nucleic acid six	2023/10/6 16:27:00									Negative		Negative		Negative		Negative		positive	↑	Negative
male	Throat swab	5year10month	pneumonia	Respiratory pathogens nucleic acid six	2023/10/6 17:13:00									Negative		Negative		Negative		Negative		positive(+）	↑	Negative
female	sputum	9month2day	bronchuspneumonia	Respiratory bacterial nucleic acid six	2023/10/6 17:43:00																					Negative(-)		positive(+）	↑	Negative(-)		Negative(-)		Negative(-)		Negative(-)
female	Throat swab	9month2day	bronchuspneumonia	Respiratory pathogens nucleic acid six	2023/10/6 17:43:00									Negative		Negative		Negative		Negative		Negative		positive	↑
female	Throat swab	24day2hour	congenitalpneumonia	Respiratory pathogens nucleic acid six	2023/10/6 17:44:00									Negative		Negative		Negative		Negative		Negative		Negative
female	sputum	24day2hour	pneumonia	Respiratory bacterial nucleic acid six	2023/10/6 17:44:00																					Negative(-)		Negative(-)		Negative(-)		Negative(-)		Negative(-)		Negative(-)
female	Throat swab	24day2hour	congenitalpneumonia	Respiratory pathogens nucleic acid six	2023/10/6 17:49:00									Negative		Negative		Negative		Negative		Negative		Negative
female	sputum	24day2hour	pneumonia	Respiratory bacterial nucleic acid six	2023/10/6 17:49:00																					Negative(-)		Negative(-)		Negative(-)		positive(+）	↑	Negative(-)		Negative(-)
female	Throat swab	3year7month	Acute upper respiratory tract infection	Respiratory pathogens nucleic acid six	2023/10/6 19:19:00									Negative		Negative		Negative		Negative		Negative		Negative
female	Throat swab	4year11month	Acute laryngotracheitis	Respiratory pathogens nucleic acid six	2023/10/6 19:22:00									Negative		Negative		Negative		Negative		Negative		Negative
male	Throat swab	2month17day	Unexplained convulsion	Respiratory pathogens nucleic acid six	2023/10/6 2:16:00									Negative		Negative		Negative		Negative		Negative		Negative
female	Throat swab	6month15day	Acute bronchitis	Respiratory pathogens nucleic acid six	2023/10/6 20:12:00									Negative		Negative		Negative		Negative		Negative		Negative
female	Throat swab	3year11month	Acute bronchitis	Respiratory pathogens nucleic acid six	2023/10/6 21:25:00									Negative		Negative		Negative		Negative		Negative		Negative
female	Throat swab	1year8month	fever	Respiratory pathogens nucleic acid six	2023/10/6 23:23:00									Negative		Negative		Negative		Negative		Negative		Negative
male	Throat swab	6year11month	Acute bronchitis	Respiratory pathogens nucleic acid six	2023/10/6 23:36:00									Negative		Negative		Negative		Negative		Negative		positive	↑
female	Throat swab	9year10month	Lobarpneumonia	Respiratory pathogens nucleic acid six	2023/10/6 9:52:00									Negative		Negative		Negative		Negative		Negative		positive	↑
female	Throat swab	3year3month	pneumonia	Respiratory pathogens nucleic acid six	2023/10/7 0:23:00									Negative		Negative		Negative		Negative		Negative		positive	↑
male	Throat swab	1year4month	fever	Respiratory pathogens nucleic acid six	2023/10/7 11:13:00									Negative		Negative		Negative		Negative		Negative		Negative
male	Throat swab	4year3month	dyspnea	Respiratory pathogens nucleic acid six	2023/10/7 11:31:00									Negative		Negative		Negative		Negative		Negative		Negative
female	Throat swab	4year	Acute bronchitis	Respiratory pathogens nucleic acid six	2023/10/7 11:53:00									Negative		Negative		Negative		Negative		positive(+）	↑	Negative
male	Throat swab	6year	fever	Respiratory pathogens nucleic acid six	2023/10/7 13:10:00									Negative		Negative		Negative		Negative		Negative		Negative
male	Throat swab	2year	Acute laryngitis	Respiratory pathogens nucleic acid six	2023/10/7 14:28:00									Negative		Negative		Negative		positive	↑	Negative		Negative
male	Throat swab	3year11month	fever	Respiratory pathogens nucleic acid six	2023/10/7 16:24:00									Negative		Negative		Negative		Negative		Negative		Negative
female	Throat swab	3year10month	Acute bronchitis	Respiratory pathogens nucleic acid six	2023/10/7 16:59:00									Negative		Negative		positive	↑	Negative		Negative		Negative
female	Throat swab	7year3month	Acute bronchitis	Respiratory pathogens nucleic acid six	2023/10/7 17:45:00									Negative		Negative		Negative		positive	↑	Negative		Negative
female	Throat swab	11month25day	Acute bronchitis	Respiratory pathogens nucleic acid six	2023/10/7 17:50:00									Negative		Negative		Negative		Negative		positive	↑	Negative
male	Throat swab	3year10month	pneumonia	Respiratory pathogens nucleic acid six	2023/10/7 18:15:00									Negative		Negative		positive	↑	Negative		Negative		Negative
female	Throat swab	10year3month	Laryngeal obstruction	Respiratory pathogens nucleic acid six	2023/10/7 19:29:00									Negative		Negative		Negative		Negative		Negative		Negative
female	Throat swab	3year1month	severe casepneumonia	Respiratory pathogens nucleic acid six	2023/10/7 2:03:00									Negative		Negative		Negative		Negative		positive	↑	Negative
male	sputum	2year	Asthmatic bronchuspneumonia	Respiratory bacterial nucleic acid six	2023/10/7 20:16:00																					Negative(-)		Negative(-)		Negative(-)		positive(+）	↑	Negative(-)		positive(+）	↑
male	Throat swab	2year	Asthmatic bronchuspneumonia	Respiratory pathogens nucleic acid six	2023/10/7 20:16:00									Negative		Negative		Negative		Negative		Negative		Negative
female	Throat swab	0hour56min钟	fever	Respiratory pathogens nucleic acid six	2023/10/7 8:38:00									Negative		Negative		Negative		Negative		Negative		Negative
male	Throat swab	11year6month	fever	Respiratory pathogens nucleic acid six	2023/10/7 8:39:00								620522201203230917	Negative		Negative		Negative		Negative		Negative		Negative
female	sputum	2year2month	pneumonia	Respiratory bacterial nucleic acid six	2023/10/7 8:46:00																					Negative(-)		positive(+）	↑	Negative(-)		Negative(-)		Negative(-)		positive(+）	↑
female	sputum	11month4day	Acute laryngotracheitis	Respiratory bacterial nucleic acid six	2023/10/7 9:03:00																					Negative(-)		positive(+）	↑	Negative(-)		Negative(-)		Negative(-)		positive(+）	↑
male	Throat swab	6month	pneumonia	Respiratory pathogens nucleic acid six	2023/10/7 9:10:00									Negative		Negative		Negative		Negative		Negative		Negative
male	Throat swab	6year5month	fever	Respiratory pathogens nucleic acid six	2023/10/7 9:56:00									Negative		Negative		Negative		Negative		Negative		Negative
female	Throat swab	1month30day	pneumonia	Respiratory pathogens nucleic acid six	2023/10/8 1:02:00									Negative		Negative		Negative		Negative		Negative		Negative
male	Throat swab	4year6month	Febrile convulsion	Respiratory pathogens nucleic acid six	2023/10/8 12:09:00									Negative		Negative		Negative		Negative		Negative		Negative
male	sputum	10year8month	fever	Respiratory bacterial nucleic acid six	2023/10/8 12:23:00																					Negative(-)		Negative(-)		Negative(-)		Negative(-)		Negative(-)		positive(+）	↑
male	Throat swab	10year8month	fever	Respiratory pathogens nucleic acid six	2023/10/8 12:23:00									Negative		Negative		Negative		Negative		positive	↑	positive	↑
female	Throat swab	2year1month	pneumonia	Respiratory pathogens nucleic acid six	2023/10/8 12:24:00									Negative		Negative		Negative		Negative		Negative		Negative
male	sputum	2month20day	pneumonia	Respiratory bacterial nucleic acid six	2023/10/8 15:58:00																					Negative(-)		Negative(-)		Negative(-)		Negative(-)		Negative(-)		positive(+）	↑
male	Throat swab	2month20day	pneumonia	Respiratory pathogens nucleic acid six	2023/10/8 15:58:00									Negative		Negative		Negative		Negative		Negative		Negative
female	Throat swab	9year5month	Acute bronchitis	Respiratory pathogens nucleic acid six	2023/10/8 17:16:00									Negative		Negative		Negative		Negative		positive	↑	positive	↑
female	Throat swab	2year9month	pneumonia	Respiratory pathogens nucleic acid six	2023/10/8 19:15:00									Negative		Negative		Negative		Negative		Negative		Negative
male	Throat swab	3year7month	Acute bronchitis	Respiratory pathogens nucleic acid six	2023/10/8 2:15:00									Negative		Negative		Negative		positive	↑	Negative		Negative
male	Throat swab	1year4month	acuteAsthmatic bronchus	Respiratory pathogens nucleic acid six	2023/10/8 2:24:00									Negative		Negative		Negative		Negative		Negative		Negative
female	Throat swab	4month16day	pneumonia	Respiratory pathogens nucleic acid six	2023/10/8 20:50:00									Negative		Negative		Negative		Negative		Negative		Negative
female	Throat swab	7year8month	fever	Respiratory pathogens nucleic acid six	2023/10/8 21:01:00									Negative		Negative		Negative		positive	↑	Negative		Negative
male	Throat swab	1year3month	pneumonia	Respiratory pathogens nucleic acid six	2023/10/8 21:18:00									Negative		Negative		Negative		Negative		Negative		Negative
male	Throat swab	6year10month	dyspnea	Respiratory pathogens nucleic acid six	2023/10/8 9:19:00									Negative		Negative		Negative		Negative		Negative		Negative
female	Throat swab	1year5month	Asthmatic bronchuspneumonia	Respiratory pathogens nucleic acid six	2023/10/9 0:14:00									Negative		Negative		Negative		Negative		Negative		positive	↑
male	Throat swab	10month12day	acuteAsthmatic bronchus	Respiratory pathogens nucleic acid six	2023/10/9 10:04:00									Negative		Negative		Negative		Negative		Negative		Negative
female	sputum	2month27day	Acute bronchitis	Respiratory bacterial nucleic acid six	2023/10/9 10:52:00																					Negative(-)		Negative(-)		Negative(-)		Negative(-)		Negative(-)		positive(+）	↑
female	Throat swab	2month27day	Acute bronchitis	Respiratory pathogens nucleic acid six	2023/10/9 10:52:00									Negative		Negative		Negative		Negative		Negative		Negative
female	sputum	11month27day	Acute bronchitis	Respiratory bacterial nucleic acid six	2023/10/9 11:18:00																					Negative(-)		Negative(-)		Negative(-)		Negative(-)		Negative(-)		positive(+）	↑
male	Throat swab	10month28day	Acute laryngotracheitis	Respiratory pathogens nucleic acid six	2023/10/9 12:43:00									Negative		Negative		Negative		Negative		Negative		Negative
female	Throat swab	1year10month	pneumonia	Respiratory pathogens nucleic acid six	2023/10/9 12:47:00									Negative		Negative		positive	↑	Negative		Negative		Negative
female	Throat swab	1year1month	Unexplained convulsion	Respiratory pathogens nucleic acid six	2023/10/9 13:05:00									Negative		Negative		Negative		Negative		Negative		Negative
female	Throat swab	9day10hour	dyspnea	Respiratory pathogens nucleic acid six	2023/10/9 13:25:00									Negative		Negative		Negative		Negative		Negative		Negative
female	sputum	4year1month	pneumonia	Respiratory bacterial nucleic acid six	2023/10/9 14:33:00																					Negative(-)		Negative(-)		Negative(-)		positive(+）	↑	Negative(-)		positive(+）	↑
female	Throat swab	4year1month	pneumonia	Respiratory pathogens nucleic acid six	2023/10/9 14:33:00									Negative		Negative		Negative		Negative		Negative		Negative
female	Throat swab	11month17day	acuteAsthmatic bronchus	Respiratory pathogens nucleic acid six	2023/10/9 15:38:00									Negative		Negative		Negative		Negative		Negative		Negative
female	sputum	11month17day	pneumonia	Respiratory bacterial nucleic acid six	2023/10/9 15:38:00																					Negative(-)		Negative(-)		Negative(-)		positive(+）	↑	Negative(-)		positive(+）	↑
female	Throat swab	1year	acuteAsthmatic bronchus	Respiratory pathogens nucleic acid six	2023/10/9 16:20:00									Negative		Negative		Negative		Negative		Negative		Negative
female	sputum	1year	pneumonia	Respiratory bacterial nucleic acid six	2023/10/9 16:20:00																					Negative(-)		Negative(-)		Negative(-)		positive(+）	↑	Negative(-)		positive(+）	↑
male	sputum	5month5day	pneumonia	Respiratory bacterial nucleic acid six	2023/10/9 16:20:00																					Negative(-)		Negative(-)		Negative(-)		positive(+）	↑	Negative(-)		positive(+）	↑
male	Throat swab	5month5day	pneumonia	Respiratory pathogens nucleic acid six	2023/10/9 16:20:00									Negative		Negative		Negative		Negative		Negative		Negative
male	Throat swab	2year6month	Unexplained convulsion	Respiratory pathogens nucleic acid six	2023/10/9 16:47:00									positive	↑	Negative		Negative		Negative		Negative		Negative
female	Throat swab	1year	Laryngeal obstruction	Respiratory pathogens nucleic acid six	2023/10/9 17:30:00									Negative		Negative		Negative		Negative		positive	↑	Negative
male	Throat swab	9month2day	Acute laryngitis	Respiratory pathogens nucleic acid six	2023/10/9 17:31:00									Negative		Negative		Negative		Negative		Negative		Negative
male	Throat swab	4month9day	Acute laryngotracheitis	Respiratory pathogens nucleic acid six	2023/10/9 18:14:00									Negative		Negative		Negative		Negative		Negative		Negative
female	Throat swab	5month27day	pneumonia	Respiratory pathogens nucleic acid six	2023/10/9 21:19:00									Negative		Negative		Negative		Negative		positive	↑	Negative
male	Throat swab	2year6month	Acute laryngitis	Respiratory pathogens nucleic acid six	2023/10/9 21:25:00									Negative		Negative		Negative		Negative		Negative		Negative
female	Throat swab	2year7month	Acute upper respiratory tract infection	Respiratory pathogens nucleic acid six	2023/10/9 21:53:00									Negative		Negative		Negative		Negative		Negative		Negative
female	Throat swab	4month25day	Acute upper respiratory tract infection	Respiratory pathogens nucleic acid six	2023/10/9 9:49:00									Negative		Negative		Negative		Negative		positive	↑	Negative
male	sputum	4month	Acute bronchitis	Respiratory bacterial nucleic acid six	2023/11/1 0:20:00																					Negative(-)		Negative(-)		positive(+）	↑	Negative(-)		Negative(-)		Negative(-)
male	Throat swab	4month	Acute bronchitis	Respiratory pathogens nucleic acid six	2023/11/1 0:20:00									Negative		Negative		positive	↑	Negative		positive	↑	Negative
male	Throat swab	3year8month	Febrile convulsion	Respiratory pathogens nucleic acid six	2023/11/1 0:33:00									Negative		Negative		Negative		Negative		Negative		Negative
male	sputum	1year9month	Acute bronchitis	Respiratory bacterial nucleic acid six	2023/11/1 0:47:00																					Negative(-)		Negative(-)		Negative(-)		positive(+）	↑	Negative(-)		positive(+）	↑
male	Throat swab	1year9month	Acute bronchitis	Respiratory pathogens nucleic acid six	2023/11/1 0:47:00									Negative		Negative		Negative		positive	↑	Negative		positive	↑
male	sputum	5month5day	Acute bronchitis	Respiratory bacterial nucleic acid six	2023/11/1 1:37:00																					Negative(-)		Negative(-)		Negative(-)		Negative(-)		Negative(-)		positive(+）	↑
male	Throat swab	5month5day	Acute bronchitis	Respiratory pathogens nucleic acid six	2023/11/1 1:37:00									Negative		Negative		positive	↑	Negative(-)		Negative		Negative
male	Throat swab	5year2month	fever	Respiratory pathogens nucleic acid six	2023/11/1 11:44:00									Negative(-)		Negative(-)		Negative(-)		positive(+）	↑	Negative(-)		Negative(-)
female	Throat swab	6year4month	pneumonia	Respiratory pathogens nucleic acid six	2023/11/1 12:01:00									Negative(-)		Negative(-)		Negative(-)		Negative(-)		Negative(-)		positive(+)	↑
male	Throat swab	1year9month	pneumonia	Respiratory pathogens nucleic acid six	2023/11/1 12:45:00									Negative(-)		Negative(-)		positive(+）	↑	Negative(-)		Negative(-)		Negative(-)
male	Throat swab	4year1month	Lobarpneumonia	Respiratory pathogens nucleic acid six	2023/11/1 13:03:00									Negative(-)		Negative(-)		Negative(-)		Negative(-)		positive(+）	↑	Negative(-)
female	Throat swab	6year5month	pneumonia	Respiratory pathogens nucleic acid six	2023/11/1 16:52:00									Negative(-)		Negative(-)		Negative(-)		Negative(-)		Negative(-)		positive(+)	↑
male	Throat swab	3year4month	Acute bronchitis	Respiratory pathogens nucleic acid six	2023/11/1 17:04:00									Negative(-)		Negative(-)		positive(+）	↑	Negative(-)		Negative(-)		Negative(-)
male	sputum	13day5hour	newbornpneumonia	Respiratory bacterial nucleic acid six	2023/11/1 17:55:00																					Negative(-)		Negative(-)		Negative(-)		Negative(-)		Negative(-)		Negative(-)
male	Throat swab	13day5hour	newbornpneumonia	Respiratory pathogens nucleic acid six	2023/11/1 17:55:00									Negative(-)		Negative(-)		Negative(-)		Negative(-)		Negative(-)		Negative(-)
male	sputum	22day1hour	newbornpneumonia	Respiratory bacterial nucleic acid six	2023/11/1 17:59:00																					Negative(-)		Negative(-)		positive(+）	↑	Negative(-)		Negative(-)		Negative(-)
male	Throat swab	22day1hour	newbornpneumonia	Respiratory pathogens nucleic acid six	2023/11/1 17:59:00									Negative(-)		Negative(-)		positive(+）	↑	Negative(-)		Negative(-)		Negative(-)
female	sputum	3year4month	pneumonia	Respiratory bacterial nucleic acid six	2023/11/1 18:32:00																					Negative(-)		Negative(-)		Negative(-)		positive(+）	↑	Negative(-)		positive(+）	↑
female	Throat swab	3year4month	pneumonia	Respiratory pathogens nucleic acid six	2023/11/1 18:32:00									Negative(-)		Negative(-)		positive(+）	↑	Negative(-)		Negative(-)		Negative(-)
female	Throat swab	6year10month	Lobarpneumonia	Respiratory pathogens nucleic acid six	2023/11/1 18:34:00									Negative(-)		Negative(-)		Negative(-)		Negative(-)		Negative(-)		positive(+)	↑
female	sputum	9year8month	pneumonia	Respiratory bacterial nucleic acid six	2023/11/1 18:37:00																					Negative(-)		Negative(-)		positive(+）	↑	positive(+）	↑	Negative(-)		positive(+）	↑
female	Throat swab	9year8month	pneumonia	Respiratory pathogens nucleic acid six	2023/11/1 18:37:00									positive(+）	↑	Negative(-)		Negative(-)		Negative(-)		Negative(-)		positive(+)	↑
male	sputum	18day11hour	congenitalpneumonia	Respiratory bacterial nucleic acid six	2023/11/1 19:40:00																					Negative(-)		Negative(-)		positive(+）	↑	Negative(-)		Negative(-)		positive(+）	↑
male	Throat swab	18day11hour	congenitalpneumonia	Respiratory pathogens nucleic acid six	2023/11/1 19:40:00									Negative(-)		Negative(-)		positive(+）	↑	Negative(-)		Negative(-)		Negative(-)
male	Throat swab	5year9month	bronchuspneumonia	Respiratory pathogens nucleic acid six	2023/11/1 20:35:00									Negative(-)		Negative(-)		Negative(-)		positive(+）	↑	Negative(-)		Negative(-)
male	sputum	7year3month	Lobarpneumonia	Respiratory bacterial nucleic acid six	2023/11/1 22:47:00																					Negative(-)		Negative(-)		Negative(-)		positive(+）	↑	Negative(-)		positive(+）	↑
male	Throat swab	7year3month	Lobarpneumonia	Respiratory pathogens nucleic acid six	2023/11/1 22:47:00									Negative(-)		Negative(-)		Negative(-)		Negative(-)		Negative(-)		Negative(-)
male	Throat swab	1year4month	bronchuspneumonia	Respiratory pathogens nucleic acid six	2023/11/1 22:49:00									Negative(-)		Negative(-)		Negative(-)		Negative(-)		Negative(-)		positive(+)	↑
male	sputum	2year7month	Acute upper respiratory tract infection	Respiratory bacterial nucleic acid six	2023/11/1 3:46:00																					Negative(-)		Negative(-)		Negative(-)		Negative(-)		Negative(-)		positive(+）	↑
male	Throat swab	2year7month	Acute upper respiratory tract infection	Respiratory pathogens nucleic acid six	2023/11/1 3:46:00									positive	↑	Negative		Negative		Negative		Negative		Negative
female	Throat swab	7year	Acute bronchitis	Respiratory pathogens nucleic acid six	2023/11/1 9:51:00									Negative(-)		Negative(-)		Negative(-)		Negative(-)		Negative(-)		Negative(-)
male	Throat swab	7year5month	bronchusasthma(acuteStage of attack)	Respiratory pathogens nucleic acid six	2023/11/10 0:18:00									Negative		Negative		Negative		Negative		positive	↑	Negative
male	Throat swab	6year11month	Unexplained convulsion	Respiratory pathogens nucleic acid six	2023/11/10 0:46:00									positive	↑	Negative		positive	↑	Negative		Negative		Negative
male	Throat swab	7year4month	Acute upper respiratory tract infection	Respiratory pathogens nucleic acid six	2023/11/10 10:19:00								620502201606221614	positive	↑	Negative		Negative		Negative		Negative		Negative
female	Throat swab	8year3month	Acute bronchitis	Respiratory pathogens nucleic acid six	2023/11/10 10:25:00								620502201508060722	positive	↑	Negative		Negative		Negative		Negative		Negative
female	Throat swab	4year6month	bronchus	Respiratory pathogens nucleic acid six	2023/11/10 11:03:00									Negative		Negative		Negative		Negative		Negative		Negative
female	sputum	4year6month	pneumonia	Respiratory bacterial nucleic acid six	2023/11/10 11:03:00																					Negative(-)		Negative(-)		positive(+）	↑	positive(+）	↑	Negative(-)		positive(+）	↑
female	Throat swab	1year3month	bronchuspneumonia	Respiratory pathogens nucleic acid six	2023/11/10 11:29:00									Negative		Negative		Negative		Negative		Negative		Negative
male	Throat swab	2year11month	Acute bronchitis	Respiratory pathogens nucleic acid six	2023/11/10 11:56:00									Negative		Negative		Negative		Negative		Negative		Negative
male	sputum	4year4month	Acute upper respiratory tract infection	Respiratory bacterial nucleic acid six	2023/11/10 12:03:00																					Negative(-)		Negative(-)		Negative(-)		Negative(-)		Negative(-)		positive(+）	↑
male	Throat swab	4year4month	Acute upper respiratory tract infection	Respiratory pathogens nucleic acid six	2023/11/10 12:03:00									Negative		Negative		Negative		Negative		Negative		Negative
male	Throat swab	5year11month	Acute bronchitis	Respiratory pathogens nucleic acid six	2023/11/10 12:22:00									Negative		Negative		Negative		Negative		Negative		positive	↑
male	sputum	10month	bronchuspneumonia	Respiratory bacterial nucleic acid six	2023/11/10 12:34:00																					Negative(-)		Negative(-)		Negative(-)		positive(+）	↑	Negative(-)		positive(+）	↑
male	Throat swab	9month30day	bronchuspneumonia	Respiratory pathogens nucleic acid six	2023/11/10 12:34:00									Negative		Negative		positive	↑	Negative		Negative		Negative
female	sputum	4year7month	Acute bronchitis	Respiratory bacterial nucleic acid six	2023/11/10 13:01:00																					Negative(-)		Negative(-)		Negative(-)		positive(+）	↑	Negative(-)		Negative(-)
female	Throat swab	4year7month	Acute bronchitis	Respiratory pathogens nucleic acid six	2023/11/10 13:01:00									Negative		positive	↑	Negative		Negative		Negative		Negative
male	sputum	1month29day	pneumonia	Respiratory bacterial nucleic acid six	2023/11/10 13:21:00																					Negative(-)		Negative(-)		positive(+）	↑	Negative(-)		Negative(-)		positive(+）	↑
male	Throat swab	1month28day	pneumonia	Respiratory pathogens nucleic acid six	2023/11/10 13:21:00									Negative		Negative		Negative		Negative		Negative		Negative
female	sputum	8year10month	Lobarpneumonia	Respiratory bacterial nucleic acid six	2023/11/10 13:56:00																					Negative(-)		Negative(-)		Negative(-)		Negative(-)		Negative(-)		Negative(-)
female	Throat swab	8year10month	Lobarpneumonia	Respiratory pathogens nucleic acid six	2023/11/10 13:56:00									Negative		Negative		Negative		Negative		Negative		positive	↑
male	sputum	8year2month	pneumonia	Respiratory bacterial nucleic acid six	2023/11/10 15:00:00																					Negative(-)		Negative(-)		Negative(-)		positive(+）	↑	Negative(-)		Negative(-)
male	Throat swab	8year2month	pneumonia	Respiratory pathogens nucleic acid six	2023/11/10 15:00:00									Negative		Negative		Negative		positive	↑	Negative		Negative
female	sputum	4year8month	fever	Respiratory bacterial nucleic acid six	2023/11/10 15:59:00																					Negative(-)		Negative(-)		Negative(-)		positive(+）	↑	Negative(-)		Negative(-)
female	Throat swab	4year8month	fever	Respiratory pathogens nucleic acid six	2023/11/10 15:59:00									positive	↑	Negative		Negative		positive	↑	Negative		Negative
male	Throat swab	4year1month	Febrile convulsion	Respiratory pathogens nucleic acid six	2023/11/10 16:55:00									Negative		Negative		Negative		Negative		Negative		Negative
male	sputum	10year7month	Lobarpneumonia	Respiratory bacterial nucleic acid six	2023/11/10 17:19:00																					Negative(-)		Negative(-)		positive(+）	↑	positive(+）	↑	Negative(-)		positive(+）	↑
male	Throat swab	10year7month	Lobarpneumonia	Respiratory pathogens nucleic acid six	2023/11/10 17:19:00									Negative		Negative		Negative		Negative		Negative		positive	↑
female	Throat swab	5year3month	Febrile convulsion	Respiratory pathogens nucleic acid six	2023/11/10 17:20:00									Negative		Negative		Negative		positive	↑	Negative		Negative
male	Throat swab	11month17day	Acute laryngitis	Respiratory pathogens nucleic acid six	2023/11/10 17:24:00									Negative		Negative		Negative		Negative		Negative		Negative
male	Throat swab	2month	pneumonia	Respiratory pathogens nucleic acid six	2023/11/10 22:50:00									Negative		Negative		Negative		Negative		Negative		Negative
male	sputum	6year6month	Acute suppurative tonsillitis	Respiratory bacterial nucleic acid six	2023/11/10 23:16:00																					Negative(-)		Negative(-)		Negative(-)		positive(+）	↑	Negative(-)		Negative(-)
male	Throat swab	6year6month	Acute suppurative tonsillitis	Respiratory pathogens nucleic acid six	2023/11/10 23:16:00									Negative		Negative		Negative		Negative		Negative		Negative
male	sputum	5month18day	Asthmatic bronchuspneumonia	Respiratory bacterial nucleic acid six	2023/11/10 5:47:00																					positive(+）	↑	positive(+）	↑	positive(+）	↑	positive(+）	↑	Negative(-)		positive(+）	↑
male	Throat swab	5month18day	Asthmatic bronchuspneumonia	Respiratory pathogens nucleic acid six	2023/11/10 5:47:00									Negative		Negative		Negative		Negative		Negative		Negative
male	Throat swab	2month4day	Asthmatic bronchuspneumonia	Respiratory pathogens nucleic acid six	2023/11/10 8:12:00									Negative		Negative		Negative		Negative		Negative		Negative
male	sputum	6year7month	Acute bronchitis	Respiratory bacterial nucleic acid six	2023/11/10 9:38:00																					Negative(-)		Negative(-)		Negative(-)		positive(+）	↑	Negative(-)		positive(+）	↑
male	Throat swab	6year7month	Acute bronchitis	Respiratory pathogens nucleic acid six	2023/11/10 9:38:00									Negative		positive	↑	Negative		Negative		Negative		positive	↑
male	sputum	3year8month	Acute bronchitis	Respiratory bacterial nucleic acid six	2023/11/11 0:43:00																					Negative(-)		Negative(-)		Negative(-)		positive(+）	↑	Negative(-)		Negative(-)
male	Throat swab	3year8month	Acute bronchitis	Respiratory pathogens nucleic acid six	2023/11/11 0:43:00									Negative		Negative		Negative		Negative		Negative		Negative
male	Throat swab	6year4month	Acute bronchitis	Respiratory pathogens nucleic acid six	2023/11/11 1:12:00									Negative		Negative		Negative		positive	↑	Negative		Negative
male	Throat swab	1year5month	Asthmatic bronchuspneumonia	Respiratory pathogens nucleic acid six	2023/11/11 11:03:00									Negative		Negative		positive	↑	positive	↑	Negative		Negative
male	Throat swab	3month21day	Acute laryngotracheitis	Respiratory pathogens nucleic acid six	2023/11/11 11:07:00									Negative		Negative		positive	↑	Negative		Negative		Negative
male	sputum	10year4month	pneumonia	Respiratory bacterial nucleic acid six	2023/11/11 11:23:00																					Negative(-)		Negative(-)		Negative(-)		positive(+）	↑	Negative(-)		positive(+）	↑
male	Throat swab	10year4month	pneumonia	Respiratory pathogens nucleic acid six	2023/11/11 11:23:00									Negative		Negative		Negative		Negative		Negative		positive	↑
female	Throat swab	6year10month	pneumoniapneumonia	Respiratory pathogens nucleic acid six	2023/11/11 12:48:00									Negative		Negative		Negative		Negative		positive	↑	positive	↑
male	Throat swab	8year10month	pneumoniapneumonia	Respiratory pathogens nucleic acid six	2023/11/11 12:50:00									Negative		Negative		Negative		Negative		positive	↑	positive	↑
male	Throat swab	3year4month	pneumonia	Respiratory pathogens nucleic acid six	2023/11/11 13:06:00									Negative		Negative		positive	↑	Negative		Negative		Negative
male	sputum	3year4month	pneumonia	Respiratory bacterial nucleic acid six	2023/11/11 13:08:00																					Negative(-)		Negative(-)		Negative(-)		positive(+）	↑	Negative(-)		Negative(-)
male	Throat swab	3year4month	pneumonia	Respiratory pathogens nucleic acid six	2023/11/11 13:08:00									Negative		Negative		positive	↑	Negative		Negative		Negative
male	sputum	26day2hour	congenitalpneumonia	Respiratory bacterial nucleic acid six	2023/11/11 13:20:00																					Negative(-)		positive(+）	↑	Negative(-)		Negative(-)		Negative(-)		Negative(-)
male	Throat swab	26day2hour	congenitalpneumonia	Respiratory pathogens nucleic acid six	2023/11/11 13:20:00									Negative		Negative		positive	↑	Negative		Negative		Negative
female	Throat swab	7month23day	Infantile diarrhea	Respiratory pathogens nucleic acid six	2023/11/11 16:16:00									Negative		Negative		Negative		Negative		Negative		Negative
female	Throat swab	8month25day	Acute laryngitis	Respiratory pathogens nucleic acid six	2023/11/11 17:33:00									Negative		Negative		positive	↑	Negative		Negative		Negative
female	sputum	1year3month	fever	Respiratory bacterial nucleic acid six	2023/11/11 17:53:00																					Negative(-)		Negative(-)		Negative(-)		positive(+）	↑	Negative(-)		positive(+）	↑
female	Throat swab	1year3month	fever	Respiratory pathogens nucleic acid six	2023/11/11 17:53:00									Negative		Negative		Negative		Negative		Negative		Negative
male	sputum	10year	pneumonia	Respiratory bacterial nucleic acid six	2023/11/11 18:23:00																					Negative(-)		Negative(-)		positive(+）	↑	positive(+）	↑	Negative(-)		Negative(-)
male	Throat swab	10year	pneumonia	Respiratory pathogens nucleic acid six	2023/11/11 18:23:00									Negative		Negative		Negative		Negative		Negative		positive	↑
male	Throat swab	12year	Acute bronchitis	Respiratory pathogens nucleic acid six	2023/11/11 19:05:00									positive	↑	Negative		Negative		Negative		Negative		Negative
female	sputum	6year10month	Acute bronchitis	Respiratory bacterial nucleic acid six	2023/11/11 19:27:00																					Negative(-)		Negative(-)		Negative(-)		positive(+）	↑	Negative(-)		Negative(-)
female	Throat swab	6year10month	Acute bronchitis	Respiratory pathogens nucleic acid six	2023/11/11 19:27:00									positive	↑	Negative		Negative		Negative		Negative		Negative
male	Throat swab	3year1month	acuteAsthmatic bronchus	Respiratory pathogens nucleic acid six	2023/11/11 20:14:00									Negative		Negative		Negative		Negative		positive	↑	Negative
male	Throat swab	4year5month	Febrile convulsion	Respiratory pathogens nucleic acid six	2023/11/11 20:58:00									Negative		Negative		Negative		Negative		Negative		Negative
male	Throat swab	4year5month	Acute bronchitis	Respiratory pathogens nucleic acid six	2023/11/11 21:25:00									Negative		Negative		Negative		positive	↑	Negative		Negative
female	Throat swab	11year1month	Childhood asthma	Respiratory pathogens nucleic acid six	2023/11/11 21:54:00									Negative		Negative		Negative		Negative		Negative		Negative
female	Throat swab	11year1month	Childhood asthma	Respiratory pathogens nucleic acid six	2023/11/11 22:21:00									Negative		Negative		Negative		Negative		Negative		Negative
male	sputum	3month7day	bronchuspneumonia	Respiratory bacterial nucleic acid six	2023/11/11 22:29:00																					Negative(-)		Negative(-)		positive(+）	↑	Negative(-)		Negative(-)		positive(+）	↑
male	Throat swab	3month7day	bronchuspneumonia	Respiratory pathogens nucleic acid six	2023/11/11 22:29:00									Negative		Negative		positive	↑	Negative		Negative		Negative
female	Throat swab	11year7month	bronchuspneumonia	Respiratory pathogens nucleic acid six	2023/11/11 22:58:00									positive	↑	Negative		Negative		Negative		Negative		positive	↑
female	sputum	3year3month	Acute bronchitis	Respiratory bacterial nucleic acid six	2023/11/11 23:30:00																					Negative(-)		Negative(-)		Negative(-)		positive(+）	↑	Negative(-)		positive(+）	↑
female	Throat swab	3year3month	Acute bronchitis	Respiratory pathogens nucleic acid six	2023/11/11 23:30:00									positive	↑	Negative		Negative		Negative		Negative		Negative
female	sputum	6year10month	Acute bronchitis	Respiratory bacterial nucleic acid six	2023/11/11 23:53:00																					Negative(-)		Negative(-)		Negative(-)		positive(+）	↑	Negative(-)		positive(+）	↑
female	Throat swab	6year10month	Acute bronchitis	Respiratory pathogens nucleic acid six	2023/11/11 23:53:00									positive	↑	Negative		Negative		Negative		Negative		Negative
female	sputum	5year1month	Acute bronchitis	Respiratory bacterial nucleic acid six	2023/11/11 5:27:00																					Negative(-)		Negative(-)		Negative(-)		positive(+）	↑	Negative(-)		positive(+）	↑
female	Throat swab	5year1month	Acute bronchitis	Respiratory pathogens nucleic acid six	2023/11/11 5:27:00									Negative		Negative		Negative		Negative		Negative		Negative
female	Throat swab	1month6day	fever	Respiratory pathogens nucleic acid six	2023/11/11 6:24:00									Negative		Negative		Negative		Negative		Negative		Negative
male	Throat swab	9month1day	pneumonia	Respiratory pathogens nucleic acid six	2023/11/11 7:35:00									Negative		Negative		positive	↑	Negative		Negative		Negative
male	Throat swab	9year7month	Acute bronchitis	Respiratory pathogens nucleic acid six	2023/11/11 8:40:00									positive	↑	Negative		Negative		Negative		Negative		Negative
female	sputum	3year4month	Acute bronchitis	Respiratory bacterial nucleic acid six	2023/11/11 8:53:00																					Negative(-)		Negative(-)		Negative(-)		Negative(-)		Negative(-)		positive(+）	↑
female	Throat swab	3year4month	Acute bronchitis	Respiratory pathogens nucleic acid six	2023/11/11 8:53:00									Negative		Negative		Negative		Negative		Negative		Negative
male	Throat swab	7year	Acute upper respiratory tract infection	Respiratory pathogens nucleic acid six	2023/11/11 9:09:00									Negative		Negative		Negative		Negative		Negative		Negative
female	Throat swab	7year5month	fever	Respiratory pathogens nucleic acid six	2023/11/11 9:34:00								620502201605150420	Negative		Negative		Negative		positive	↑	Negative		Negative
female	sputum	9year10month	pneumonia	Respiratory bacterial nucleic acid six	2023/11/12 10:21:00																					Negative(-)		Negative(-)		Negative(-)		Negative(-)		Negative(-)		positive(+）	↑
female	Throat swab	9year10month	pneumonia	Respiratory pathogens nucleic acid six	2023/11/12 10:21:00									Negative		Negative		Negative		Negative		Negative		positive	↑
male	sputum	4year	Acute bronchitis	Respiratory bacterial nucleic acid six	2023/11/12 10:52:00																					Negative(-)		Negative(-)		Negative(-)		positive(+）	↑	Negative(-)		positive(+）	↑
male	Throat swab	4year	Acute bronchitis	Respiratory pathogens nucleic acid six	2023/11/12 10:52:00									positive	↑	Negative		Negative		Negative		Negative		Negative
male	Throat swab	5month17day	Asthmatic bronchuspneumonia	Respiratory pathogens nucleic acid six	2023/11/12 11:26:00									Negative		Negative		positive	↑	Negative		positive	↑	Negative
female	Throat swab	10month22day	Asthmatic bronchuspneumonia	Respiratory pathogens nucleic acid six	2023/11/12 12:18:00									Negative		Negative		Negative		positive	↑	Negative		Negative
male	Throat swab	7year7month	Acute bronchitis	Respiratory pathogens nucleic acid six	2023/11/12 12:41:00									Negative		Negative		Negative		Negative		Negative		positive	↑
male	Throat swab	2year	pneumonia	Respiratory pathogens nucleic acid six	2023/11/12 13:00:00									Negative		Negative		positive	↑	Negative		Negative		Negative
male	Throat swab	8month16day	acuteAsthmatic bronchus	Respiratory pathogens nucleic acid six	2023/11/12 13:06:00									Negative		Negative		positive	↑	Negative		Negative		Negative
male	Throat swab	9month10day	pneumonia	Respiratory pathogens nucleic acid six	2023/11/12 13:09:00									Negative		Negative		positive	↑	Negative		Negative		Negative
male	Throat swab	5year9month	Acute bronchitis	Respiratory pathogens nucleic acid six	2023/11/12 13:35:00								620502201801291319	Negative		Negative		Negative		positive	↑	Negative		Negative
female	Throat swab	26day	congenitalpneumonia	Respiratory pathogens nucleic acid six	2023/11/12 14:27:00									Negative		Negative		positive	↑	Negative		Negative		Negative
female	sputum	26day	pneumonia	Respiratory bacterial nucleic acid six	2023/11/12 14:27:00																					Negative(-)		Negative(-)		Negative(-)		Negative(-)		Negative(-)		Negative(-)
female	Throat swab	3year2month	Unexplained convulsion	Respiratory pathogens nucleic acid six	2023/11/12 14:54:00									positive	↑	Negative		Negative		Negative		Negative		Negative
female	Throat swab	8year1month	Acute bronchitis	Respiratory pathogens nucleic acid six	2023/11/12 15:20:00									Negative		Negative		Negative		positive	↑	Negative		Negative
male	Throat swab	6month28day	pneumonia	Respiratory pathogens nucleic acid six	2023/11/12 16:44:00									Negative		Negative		positive	↑	Negative		Negative		Negative
male	Throat swab	6year4month	Acute bronchitis	Respiratory pathogens nucleic acid six	2023/11/12 16:46:00									Negative		Negative		Negative		Negative		Negative		positive	↑
female	Throat swab	10year2month	Acute bronchitis	Respiratory pathogens nucleic acid six	2023/11/12 16:53:00									Negative		Negative		Negative		positive	↑	Negative		Negative
male	Throat swab	3year6month	Acute bronchitis	Respiratory pathogens nucleic acid six	2023/11/12 17:22:00									positive	↑	Negative		Negative		Negative		Negative		Negative
male	sputum	9year5month	Acute laryngotracheitis	Respiratory bacterial nucleic acid six	2023/11/12 17:47:00																					Negative(-)		Negative(-)		Negative(-)		Negative(-)		Negative(-)		positive(+）	↑
male	Throat swab	9year5month	Acute laryngotracheitis	Respiratory pathogens nucleic acid six	2023/11/12 17:47:00									Negative		Negative		Negative		Negative		Negative		Negative
male	Throat swab	13year	Acute upper respiratory tract infection	Respiratory pathogens nucleic acid six	2023/11/12 19:06:00									Negative		Negative		Negative		Negative		positive	↑	Negative
male	sputum	1year3month	pneumonia	Respiratory bacterial nucleic acid six	2023/11/12 19:23:00																					Negative(-)		Negative(-)		Negative(-)		positive(+）	↑	Negative(-)		positive(+）	↑
male	Throat swab	1year3month	pneumonia	Respiratory pathogens nucleic acid six	2023/11/12 19:23:00									Negative		Negative		Negative		Negative		Negative		Negative
male	sputum	5year10month	fever	Respiratory bacterial nucleic acid six	2023/11/12 19:28:00																					Negative(-)		Negative(-)		Negative(-)		positive(+）	↑	Negative(-)		positive(+）	↑
male	Throat swab	5year10month	fever	Respiratory pathogens nucleic acid six	2023/11/12 19:28:00									Negative		Negative		Negative		Negative		Negative		Negative
female	sputum	7month15day	Asthmatic bronchuspneumonia	Respiratory bacterial nucleic acid six	2023/11/12 19:32:00																					Negative(-)		Negative(-)		Negative(-)		Negative(-)		Negative(-)		positive(+）	↑
female	Throat swab	7month15day	Asthmatic bronchuspneumonia	Respiratory pathogens nucleic acid six	2023/11/12 19:32:00									Negative		Negative		Negative		Negative		Negative		positive	↑
male	Throat swab	5year7month	bronchuspneumonia	Respiratory pathogens nucleic acid six	2023/11/12 19:33:00									Negative		Negative		Negative		Negative		Negative		positive	↑
female	Throat swab	4year	fever	Respiratory pathogens nucleic acid six	2023/11/12 2:20:00									Negative		Negative		Negative		positive	↑	Negative		Negative
female	sputum	10month2day	pneumonia	Respiratory bacterial nucleic acid six	2023/11/12 20:12:00																					Negative(-)		Negative(-)		Negative(-)		positive(+）	↑	Negative(-)		positive(+）	↑
female	Throat swab	10month2day	pneumonia	Respiratory pathogens nucleic acid six	2023/11/12 20:12:00									Negative		Negative		Negative		Negative		Negative		Negative
female	Throat swab	7year2month	Acute bronchitis	Respiratory pathogens nucleic acid six	2023/11/12 20:22:00									Negative		Negative		Negative		positive	↑	Negative		positive	↑
male	sputum	5year1month	Acute bronchitis	Respiratory bacterial nucleic acid six	2023/11/12 20:39:00																					Negative(-)		Negative(-)		Negative(-)		positive(+）	↑	Negative(-)		positive(+）	↑
male	Throat swab	5year1month	Acute bronchitis	Respiratory pathogens nucleic acid six	2023/11/12 20:39:00									Negative		Negative		positive	↑	Negative		Negative		Negative
female	Throat swab	10year4month	pneumonia	Respiratory pathogens nucleic acid six	2023/11/12 22:43:00									Negative		Negative		Negative		Negative		Negative		positive	↑
female	Throat swab	5year8month	pneumonia	Respiratory pathogens nucleic acid six	2023/11/12 23:46:00									positive	↑	Negative		Negative		Negative		Negative		Negative
male	Throat swab	1year9month	Acute upper respiratory tract infection	Respiratory pathogens nucleic acid six	2023/11/12 23:59:00									positive	↑	Negative		Negative		Negative		Negative		positive(+)	↑
female	Throat swab	3year5month	Acute bronchitis	Respiratory pathogens nucleic acid six	2023/11/13 0:55:00									Negative		Negative		positive	↑	Negative(-)		Negative		positive	↑
male	sputum	3year3month	pneumonia	Respiratory bacterial nucleic acid six	2023/11/13 1:24:00																					Negative(-)		Negative(-)		Negative(-)		Negative(-)		Negative(-)		Negative(-)
male	Throat swab	3year3month	pneumonia	Respiratory pathogens nucleic acid six	2023/11/13 1:24:00									Negative(-)		Negative(-)		positive(+）	↑	Negative(-)		Negative(-)		Negative(-)
female	Throat swab	1year6month	pneumonia	Respiratory pathogens nucleic acid six	2023/11/13 10:31:00									Negative		Negative		positive	↑	positive	↑	Negative		Negative
male	Throat swab	8year5month	Acute bronchitis	Respiratory pathogens nucleic acid six	2023/11/13 11:38:00								620525201505260010	positive	↑	Negative		Negative		Negative		Negative		Negative
female	Throat swab	3year5month	Acute bronchitis	Respiratory pathogens nucleic acid six	2023/11/13 12:02:00									Negative		Negative		Negative		positive	↑	Negative(-)		Negative
female	Throat swab	2year	pneumonia	Respiratory pathogens nucleic acid six	2023/11/13 12:54:00									Negative		Negative		Negative		Negative		Negative		Negative
female	sputum	10year9month	Acute bronchitis	Respiratory bacterial nucleic acid six	2023/11/13 12:59:00																					Negative(-)		Negative(-)		Negative(-)		Negative(-)		Negative(-)		positive(+）	↑
female	Throat swab	10year9month	Acute bronchitis	Respiratory pathogens nucleic acid six	2023/11/13 12:59:00									Negative		Negative		Negative		Negative		Negative		Negative
male	sputum	8year9month	Acute bronchitis	Respiratory bacterial nucleic acid six	2023/11/13 13:03:00																					Negative(-)		Negative(-)		positive(+）	↑	positive(+）	↑	Negative(-)		Negative(-)
male	Throat swab	8year9month	Acute bronchitis	Respiratory pathogens nucleic acid six	2023/11/13 13:03:00									Negative		Negative		Negative		Negative		Negative		positive	↑
female	Throat swab	3year10month	Lobarpneumonia	Respiratory pathogens nucleic acid six	2023/11/13 13:08:00									Negative		Negative		Negative		Negative		Negative		positive	↑
male	Throat swab	8year3month	pneumonia	Respiratory pathogens nucleic acid six	2023/11/13 14:05:00									Negative		Negative		Negative		positive	↑	Negative		positive	↑
female	sputum	2year1month	pneumonia	Respiratory bacterial nucleic acid six	2023/11/13 14:21:00																					Negative(-)		Negative(-)		Negative(-)		positive(+）	↑	Negative(-)		positive(+）	↑
female	Throat swab	2year1month	pneumonia	Respiratory pathogens nucleic acid six	2023/11/13 14:21:00									Negative		Negative		Negative		Negative		Negative		Negative
female	sputum	3year11month	pneumonia	Respiratory bacterial nucleic acid six	2023/11/13 15:47:00																					Negative(-)		Negative(-)		Negative(-)		positive(+）	↑	Negative(-)		Negative(-)
female	Throat swab	3year11month	pneumonia	Respiratory pathogens nucleic acid six	2023/11/13 15:47:00									Negative		Negative		Negative		Negative		Negative		Negative
female	sputum	3year5month	Acute bronchitis	Respiratory bacterial nucleic acid six	2023/11/13 16:01:00																					Negative(-)		Negative(-)		Negative(-)		positive(+）	↑	Negative(-)		positive(+）	↑
female	Throat swab	3year5month	Acute bronchitis	Respiratory pathogens nucleic acid six	2023/11/13 16:01:00									Negative		Negative		Negative		positive	↑	Negative		Negative
female	Throat swab	7year1month	Acute bronchitis	Respiratory pathogens nucleic acid six	2023/11/13 16:10:00									Negative		Negative		Negative		Negative		Negative		positive	↑
female	Throat swab	3month17day	pneumonia	Respiratory pathogens nucleic acid six	2023/11/13 16:11:00									Negative		Negative		positive	↑	Negative		Negative		Negative
male	sputum	4year2month	Acute bronchitis	Respiratory bacterial nucleic acid six	2023/11/13 16:39:00																					Negative(-)		Negative(-)		Negative(-)		positive(+）	↑	Negative(-)		positive(+）	↑
male	Throat swab	4year2month	Acute bronchitis	Respiratory pathogens nucleic acid six	2023/11/13 16:39:00									Negative		Negative		Negative		Negative		Negative		positive	↑
male	sputum	4month28day	pneumonia	Respiratory bacterial nucleic acid six	2023/11/13 16:45:00																					Negative(-)		positive(+）	↑	positive(+）	↑	Negative(-)		Negative(-)		positive(+）	↑
male	Throat swab	4month28day	pneumonia	Respiratory pathogens nucleic acid six	2023/11/13 16:45:00									Negative		Negative		Negative		Negative		Negative		Negative
female	sputum	3year9month	pneumonia	Respiratory bacterial nucleic acid six	2023/11/13 16:48:00																					Negative(-)		Negative(-)		Negative(-)		positive(+）	↑	Negative(-)		Negative(-)
female	Throat swab	3year9month	pneumonia	Respiratory pathogens nucleic acid six	2023/11/13 16:48:00									Negative		Negative		Negative		positive	↑	Negative		Negative
male	Throat swab	1year3month	pneumonia	Respiratory pathogens nucleic acid six	2023/11/13 16:52:00									Negative		Negative		positive	↑	Negative		Negative		positive	↑
male	sputum	2year2month	Acute bronchitis	Respiratory bacterial nucleic acid six	2023/11/13 16:54:00																					Negative(-)		Negative(-)		Negative(-)		Negative(-)		Negative(-)		positive(+）	↑
male	Throat swab	2year2month	Acute bronchitis	Respiratory pathogens nucleic acid six	2023/11/13 16:54:00									Negative		Negative		positive	↑	Negative		Negative		Negative
male	Throat swab	1year5month	pneumonia	Respiratory pathogens nucleic acid six	2023/11/13 17:26:00									Negative		Negative		Negative		Negative		Negative		Negative
male	sputum	4year8month	pneumonia，其他的 病原体未特指的	Respiratory bacterial nucleic acid six	2023/11/13 17:38:00																					Negative(-)		Negative(-)		Negative(-)		positive(+）	↑	Negative(-)		positive(+）	↑
male	Throat swab	4year8month	pneumonia，其他的 病原体未特指的	Respiratory pathogens nucleic acid six	2023/11/13 17:38:00									Negative		Negative		Negative		Negative		Negative		positive	↑
male	Throat swab	1year8month	Acute bronchitis	Respiratory pathogens nucleic acid six	2023/11/13 18:21:00									Negative		Negative		positive	↑	Negative		Negative		Negative
male	Throat swab	5year10month	Acute bronchitis	Respiratory pathogens nucleic acid six	2023/11/13 18:28:00									positive	↑	Negative		Negative		Negative		Negative		Negative
female	Throat swab	1year7month	Acute upper respiratory tract infection	Respiratory pathogens nucleic acid six	2023/11/13 19:21:00									Negative		Negative		Negative		positive	↑	Negative		positive	↑
female	Throat swab	1year	pneumonia	Respiratory pathogens nucleic acid six	2023/11/13 2:19:00									positive	↑	Negative		Negative		Negative		Negative		positive	↑
male	Throat swab	3month30day	severe casepneumonia	Respiratory pathogens nucleic acid six	2023/11/13 2:55:00									Negative		Negative		positive	↑	Negative		positive	↑	Negative
female	sputum	1year10month	Acute bronchitis	Respiratory bacterial nucleic acid six	2023/11/13 22:23:00																					Negative(-)		Negative(-)		Negative(-)		Negative(-)		Negative(-)		positive(+）	↑
female	Throat swab	1year10month	Acute bronchitis	Respiratory pathogens nucleic acid six	2023/11/13 22:23:00									Negative		Negative		Negative		Negative		Negative		Negative
female	sputum	1year	Asthmatic bronchuspneumonia	Respiratory bacterial nucleic acid six	2023/11/13 8:07:00																					Negative(-)		Negative(-)		Negative(-)		positive(+）	↑	Negative(-)		positive(+）	↑
female	Throat swab	1year	Asthmatic bronchuspneumonia	Respiratory pathogens nucleic acid six	2023/11/13 8:07:00									Negative		Negative		positive	↑	Negative		Negative		Negative
male	Throat swab	9month6day	Acute laryngotracheitis	Respiratory pathogens nucleic acid six	2023/11/13 8:09:00									Negative		Negative		Negative		Negative		Negative		Negative
male	Throat swab	1year	Acute bronchitis	Respiratory pathogens nucleic acid six	2023/11/13 9:16:00									Negative		Negative		Negative		Negative		Negative		Negative
male	Throat swab	6year6month	Acute bronchitis	Respiratory pathogens nucleic acid six	2023/11/13 9:16:00								620502201704221319	positive(+）	↑	Negative(-)		Negative(-)		positive(+）	↑	Negative(-)		positive(+)	↑
male	Throat swab	7year3month	Acute bronchitis	Respiratory pathogens nucleic acid six	2023/11/13 9:17:00									positive(+）	↑	Negative(-)		Negative(-)		Negative(-)		Negative(-)		Negative(-)
female	Throat swab	8year10month	Acute bronchitis	Respiratory pathogens nucleic acid six	2023/11/13 9:44:00									Negative		Negative		Negative		positive	↑	Negative		positive	↑
female	sputum	2year	pneumonia	Respiratory bacterial nucleic acid six	2023/11/14 1:22:00																					Negative(-)		Negative(-)		Negative(-)		positive(+）	↑	Negative(-)		positive(+）	↑
female	Throat swab	2year	pneumonia	Respiratory pathogens nucleic acid six	2023/11/14 1:22:00									Negative		Negative		Negative		Negative		Negative		Negative
female	Throat swab	5year9month	Acute bronchitis	Respiratory pathogens nucleic acid six	2023/11/14 10:29:00								620523201802101101	positive	↑	Negative		Negative		positive	↑	Negative		Negative
male	sputum	4year11month	Acute bronchitis	Respiratory bacterial nucleic acid six	2023/11/14 10:34:00																					Negative(-)		Negative(-)		Negative(-)		Negative(-)		Negative(-)		positive(+）	↑
male	Throat swab	4year11month	Acute bronchitis	Respiratory pathogens nucleic acid six	2023/11/14 10:34:00									positive	↑	Negative		Negative		Negative		Negative		Negative
female	sputum	1year8month	pneumonia	Respiratory bacterial nucleic acid six	2023/11/14 10:38:00																					Negative(-)		Negative(-)		Negative(-)		positive(+）	↑	Negative(-)		positive(+）	↑
female	Throat swab	1year8month	pneumonia	Respiratory pathogens nucleic acid six	2023/11/14 10:38:00									Negative		Negative		positive	↑	Negative		Negative		Negative
male	Throat swab	10month6day	Asthmatic bronchuspneumonia	Respiratory pathogens nucleic acid six	2023/11/14 10:43:00									Negative		Negative		positive	↑	Negative		Negative		Negative
female	Throat swab	6year10month	Acute bronchitis	Respiratory pathogens nucleic acid six	2023/11/14 11:07:00								620502201612240723	positive	↑	Negative		Negative		Negative		Negative		Negative
male	Throat swab	3year8month	pneumonia	Respiratory pathogens nucleic acid six	2023/11/14 11:18:00									Negative		Negative		positive	↑	Negative		Negative		Negative
female	sputum	12year	Acute bronchitis	Respiratory bacterial nucleic acid six	2023/11/14 11:23:00								620502201111081621	positive	↑	Negative		Negative		Negative		Negative		Negative
male	sputum	11month14day	Acute bronchitis	Respiratory bacterial nucleic acid six	2023/11/14 11:52:00																					Negative(-)		Negative(-)		Negative(-)		positive(+）	↑	Negative(-)		positive(+）	↑
male	Throat swab	11month14day	Acute bronchitis	Respiratory pathogens nucleic acid six	2023/11/14 11:52:00									Negative		Negative		positive	↑	positive	↑	Negative		Negative
male	Throat swab	10year5month	Acute bronchitis	Respiratory pathogens nucleic acid six	2023/11/14 11:57:00									Negative		Negative		Negative		positive	↑	Negative		positive	↑
male	Throat swab	1year	Asthmatic bronchuspneumonia	Respiratory pathogens nucleic acid six	2023/11/14 12:01:00									Negative		Negative		positive	↑	Negative		Negative		Negative
male	Throat swab	8year5month	Acute bronchitis	Respiratory pathogens nucleic acid six	2023/11/14 13:17:00									positive	↑	Negative		Negative		Negative		Negative		Negative
male	Throat swab	6year10month	fever	Respiratory pathogens nucleic acid six	2023/11/14 14:31:00									Negative		positive	↑	Negative		positive	↑	Negative		Negative
male	Throat swab	7year3month	Acute bronchitis	Respiratory pathogens nucleic acid six	2023/11/14 14:36:00									Negative		Negative		Negative		positive	↑	Negative		positive	↑
male	sputum	3year11month	Acute bronchitis	Respiratory bacterial nucleic acid six	2023/11/14 15:06:00																					Negative(-)		Negative(-)		Negative(-)		positive(+）	↑	Negative(-)		Negative(-)
male	Throat swab	3year11month	Acute bronchitis	Respiratory pathogens nucleic acid six	2023/11/14 15:06:00									Negative		Negative		positive	↑	positive	↑	Negative		Negative
female	Throat swab	4year11month	Acute bronchitis	Respiratory pathogens nucleic acid six	2023/11/14 15:22:00									Negative		Negative		Negative		Negative		Negative		positive	↑
male	Throat swab	8year8month	pneumonia	Respiratory pathogens nucleic acid six	2023/11/14 15:40:00									Negative		Negative		Negative		Negative(-)		Negative		positive	↑
female	Throat swab	7year7month	Acute bronchitis	Respiratory pathogens nucleic acid six	2023/11/14 16:16:00									Negative		Negative		Negative		Negative		Negative		positive	↑
male	Throat swab	25day23hour	congenitalpneumonia	Respiratory pathogens nucleic acid six	2023/11/14 16:18:00									Negative		Negative		Negative		Negative		positive	↑	Negative
male	sputum	25day23hour	pneumonia	Respiratory bacterial nucleic acid six	2023/11/14 16:18:00																					positive(+）	↑	Negative(-)		Negative(-)		Negative(-)		Negative(-)		Negative(-)
male	Throat swab	4year11month	Acute bronchitis	Respiratory pathogens nucleic acid six	2023/11/14 16:32:00									Negative		Negative		Negative		positive	↑	Negative		Negative
female	sputum	8year4month	Acute bronchitis	Respiratory bacterial nucleic acid six	2023/11/14 16:34:00																					Negative(-)		Negative(-)		Negative(-)		positive(+）	↑	Negative(-)		positive(+）	↑
female	Throat swab	8year4month	Acute bronchitis	Respiratory pathogens nucleic acid six	2023/11/14 16:34:00									positive	↑	Negative		Negative		positive	↑	Negative		positive	↑
male	Throat swab	4year3month	bronchuspneumonia	Respiratory pathogens nucleic acid six	2023/11/14 16:59:00								621225201908061811	Negative		Negative		Negative		Negative		Negative		positive	↑
female	sputum	1year4month	Asthmatic bronchuspneumonia	Respiratory bacterial nucleic acid six	2023/11/14 17:06:00																					Negative(-)		Negative(-)		Negative(-)		positive(+）	↑	Negative(-)		positive(+）	↑
female	Throat swab	1year4month	Asthmatic bronchuspneumonia	Respiratory pathogens nucleic acid six	2023/11/14 17:06:00									Negative		Negative		Negative		Negative		Negative		Negative
female	sputum	6month24day	pneumonia	Respiratory bacterial nucleic acid six	2023/11/14 17:19:00																					Negative(-)		Negative(-)		Negative(-)		positive(+）	↑	Negative(-)		positive(+）	↑
female	Throat swab	6month24day	pneumonia	Respiratory pathogens nucleic acid six	2023/11/14 17:19:00									Negative		Negative		positive	↑	Negative		Negative		Negative
male	sputum	8month16day	Acute laryngitis	Respiratory bacterial nucleic acid six	2023/11/14 17:23:00																					Negative(-)		Negative(-)		Negative(-)		positive(+）	↑	Negative(-)		positive(+）	↑
male	Throat swab	8month16day	Acute laryngitis	Respiratory pathogens nucleic acid six	2023/11/14 17:23:00									Negative		Negative		positive	↑	Negative		Negative		Negative
male	sputum	10year3month	pneumonia	Respiratory bacterial nucleic acid six	2023/11/14 17:31:00																					Negative(-)		Negative(-)		Negative(-)		Negative(-)		Negative(-)		positive(+）	↑
male	Throat swab	10year3month	pneumonia	Respiratory pathogens nucleic acid six	2023/11/14 17:31:00									Negative		Negative		Negative		Negative		Negative		positive	↑
male	sputum	6year	Acute bronchitis	Respiratory bacterial nucleic acid six	2023/11/14 17:53:00																					Negative(-)		Negative(-)		Negative(-)		positive(+）	↑	Negative(-)		positive(+）	↑
male	Throat swab	6year	Acute bronchitis	Respiratory pathogens nucleic acid six	2023/11/14 17:53:00									Negative		Negative		Negative		Negative		Negative		positive	↑
male	Throat swab	3year10month	pneumonia	Respiratory pathogens nucleic acid six	2023/11/14 18:03:00									positive	↑	Negative		positive	↑	positive	↑	Negative		Negative
female	sputum	6year10month	pneumonia	Respiratory bacterial nucleic acid six	2023/11/14 20:00:00																					Negative(-)		Negative(-)		Negative(-)		positive(+）	↑	Negative(-)		Negative(-)
female	Throat swab	6year10month	Unexplained convulsion	Respiratory pathogens nucleic acid six	2023/11/14 20:00:00									Negative		Negative		Negative		positive	↑	Negative		Negative
female	Throat swab	2year8month	fever	Respiratory pathogens nucleic acid six	2023/11/14 20:29:00									Negative		Negative		Negative		Negative		Negative(-)		Negative
male	Throat swab	12year	Acute bronchitis	Respiratory pathogens nucleic acid six	2023/11/14 20:44:00								330382201111111757	Negative		Negative		Negative		Negative		positive	↑	Negative
male	Throat swab	8month10day	Asthmatic bronchuspneumonia	Respiratory pathogens nucleic acid six	2023/11/14 21:29:00									Negative		Negative		positive	↑	positive	↑	positive	↑	Negative
female	Throat swab	8year9month	pneumonia	Respiratory pathogens nucleic acid six	2023/11/14 21:47:00									positive	↑	Negative		Negative		positive	↑	Negative		Negative
male	Throat swab	7year6month	pneumonia	Respiratory pathogens nucleic acid six	2023/11/14 22:52:00									Negative		Negative		Negative		Negative		Negative		positive	↑
male	Throat swab	11year5month	Acute bronchitis	Respiratory pathogens nucleic acid six	2023/11/14 8:07:00								620502201206010412	positive	↑	Negative		Negative		Negative		Negative		Negative
female	Throat swab	6year	Acute bronchitis	Respiratory pathogens nucleic acid six	2023/11/14 8:53:00								620523201711101405	Negative		Negative		Negative		Negative		Negative		positive	↑
female	Throat swab	6year2month	Acute bronchitis	Respiratory pathogens nucleic acid six	2023/11/14 9:10:00								620502201708220049	Negative(-)		Negative(-)		Negative(-)		Negative(-)		Negative(-)		Negative(-)
male	Throat swab	8year1month	Acute bronchitis	Respiratory pathogens nucleic acid six	2023/11/14 9:22:00								620502201509302017	Negative		Negative		Negative		positive	↑	positive	↑	positive	↑
male	Throat swab	5month16day	pneumonia	Respiratory pathogens nucleic acid six	2023/11/15 1:55:00									Negative		Negative		positive	↑	Negative		Negative		Negative
male	sputum	9year9month	Acute bronchitis	Respiratory bacterial nucleic acid six	2023/11/15 10:06:00																					Negative(-)		Negative(-)		Negative(-)		Negative(-)		Negative(-)		Negative(-)
male	Throat swab	9year9month	Acute bronchitis	Respiratory pathogens nucleic acid six	2023/11/15 10:06:00									positive	↑	Negative		Negative		positive	↑	Negative		Negative
male	Throat swab	7year3month	pneumonia	Respiratory pathogens nucleic acid six	2023/11/15 10:10:00									Negative		Negative		Negative		positive	↑	Negative		positive	↑
female	sputum	4year8month	pneumonia	Respiratory bacterial nucleic acid six	2023/11/15 10:14:00																					Negative(-)		Negative(-)		Negative(-)		Negative(-)		Negative(-)		Negative(-)
female	Throat swab	4year8month	pneumonia	Respiratory pathogens nucleic acid six	2023/11/15 10:14:00									Negative		Negative		positive	↑	Negative		Negative		Negative
female	Throat swab	7year10month	fever	Respiratory pathogens nucleic acid six	2023/11/15 10:27:00									Negative		Negative		Negative		Negative		Negative		positive	↑
male	Throat swab	7month17day	Acute bronchitis	Respiratory pathogens nucleic acid six	2023/11/15 11:00:00									Negative		Negative		positive	↑	Negative		Negative		Negative
female	Throat swab	3year	bronchuspneumonia	Respiratory pathogens nucleic acid six	2023/11/15 11:04:00									Negative		Negative		Negative		Negative		Negative		positive	↑
female	Throat swab	8year	bronchus	Respiratory pathogens nucleic acid six	2023/11/15 11:10:00									Negative		Negative		Negative		positive	↑	Negative		Negative
male	sputum	7year3month	Acute bronchitis	Respiratory bacterial nucleic acid six	2023/11/15 11:42:00																					Negative(-)		Negative(-)		positive(+）	↑	positive(+）	↑	Negative(-)		positive(+）	↑
male	Throat swab	7year3month	Acute bronchitis	Respiratory pathogens nucleic acid six	2023/11/15 11:42:00									positive	↑	Negative		Negative		Negative		Negative		Negative
male	Throat swab	2year4month	Asthmatic bronchuspneumonia	Respiratory pathogens nucleic acid six	2023/11/15 12:49:00									Negative		Negative		positive	↑	Negative		Negative		Negative
male	sputum	4year10month	pneumonia	Respiratory bacterial nucleic acid six	2023/11/15 13:07:00																					Negative(-)		Negative(-)		Negative(-)		positive(+）	↑	Negative(-)		Negative(-)
male	Throat swab	4year10month	pneumonia	Respiratory pathogens nucleic acid six	2023/11/15 13:07:00									Negative		Negative		Negative		Negative		Negative		Negative
male	Throat swab	6month	Asthmatic bronchuspneumonia	Respiratory pathogens nucleic acid six	2023/11/15 14:24:00									Negative		Negative		Negative		Negative		Negative		Negative
female	sputum	7year10month	Acute bronchitis	Respiratory bacterial nucleic acid six	2023/11/15 14:59:00																					Negative(-)		Negative(-)		Negative(-)		positive(+）	↑	Negative(-)		Negative(-)
female	Throat swab	7year10month	Acute bronchitis	Respiratory pathogens nucleic acid six	2023/11/15 14:59:00									Negative		Negative		Negative		Negative		Negative		Negative
female	Throat swab	3year4month	acuteAsthmatic bronchus	Respiratory pathogens nucleic acid six	2023/11/15 15:25:00									Negative		Negative		Negative		Negative		Negative		positive	↑
female	sputum	3year4month	pneumonia	Respiratory bacterial nucleic acid six	2023/11/15 15:25:00																					Negative(-)		Negative(-)		Negative(-)		Negative(-)		Negative(-)		positive(+）	↑
female	Throat swab	3year6month	pneumonia	Respiratory pathogens nucleic acid six	2023/11/15 15:32:00									Negative		Negative		Negative		positive	↑	Negative		Negative
female	Throat swab	2year4month	pneumonia	Respiratory pathogens nucleic acid six	2023/11/15 15:35:00									Negative		Negative		Negative		Negative		Negative		Negative
male	sputum	4year5month	pneumonia	Respiratory bacterial nucleic acid six	2023/11/15 15:44:00																					Negative(-)		Negative(-)		Negative(-)		Negative(-)		Negative(-)		positive(+）	↑
male	Throat swab	4year5month	pneumonia	Respiratory pathogens nucleic acid six	2023/11/15 15:44:00									Negative		Negative		Negative		positive	↑	Negative		positive	↑
male	sputum	8year10month	pneumonia	Respiratory bacterial nucleic acid six	2023/11/15 16:09:00																					Negative(-)		Negative(-)		positive(+）	↑	positive(+）	↑	Negative(-)		positive(+）	↑
male	Throat swab	8year10month	pneumonia	Respiratory pathogens nucleic acid six	2023/11/15 16:09:00									positive	↑	Negative		Negative		Negative		positive	↑	positive	↑
female	sputum	6year5month	Acute suppurative tonsillitis	Respiratory bacterial nucleic acid six	2023/11/15 16:25:00																					Negative(-)		Negative(-)		Negative(-)		Negative(-)		Negative(-)		Negative(-)
female	Throat swab	6year5month	Acute suppurative tonsillitis	Respiratory pathogens nucleic acid six	2023/11/15 16:25:00									Negative		Negative		Negative		Negative		Negative		positive	↑
male	Throat swab	11year5month	fever	Respiratory pathogens nucleic acid six	2023/11/15 16:46:00								620522201206074657	Negative		Negative		Negative		Negative		Negative		positive	↑
male	Throat swab	10year5month	Acute suppurative tonsillitis	Respiratory pathogens nucleic acid six	2023/11/15 17:18:00									Negative		Negative		positive	↑	Negative		Negative		Negative
female	sputum	6month20day	Asthmatic bronchuspneumonia	Respiratory bacterial nucleic acid six	2023/11/15 17:33:00																					Negative(-)		Negative(-)		Negative(-)		Negative(-)		Negative(-)		positive(+）	↑
female	Throat swab	6month20day	Asthmatic bronchuspneumonia	Respiratory pathogens nucleic acid six	2023/11/15 17:33:00									Negative		Negative		positive	↑	Negative		Negative		Negative
female	Throat swab	6year5month	pneumoniapneumonia	Respiratory pathogens nucleic acid six	2023/11/15 18:11:00									Negative		Negative		Negative		Negative		Negative		positive	↑
male	Throat swab	3year10month	Acute upper respiratory tract infection	Respiratory pathogens nucleic acid six	2023/11/15 18:15:00									Negative		Negative		Negative		Negative		Negative		Negative
female	sputum	4year4month	Acute bronchitis	Respiratory bacterial nucleic acid six	2023/11/15 18:57:00																					Negative(-)		Negative(-)		Negative(-)		positive(+）	↑	Negative(-)		Negative(-)
female	Throat swab	4year4month	Acute bronchitis	Respiratory pathogens nucleic acid six	2023/11/15 18:57:00									Negative		Negative		Negative		Negative		Negative		Negative
male	sputum	4year	Acute bronchitis	Respiratory bacterial nucleic acid six	2023/11/15 19:39:00																					Negative(-)		Negative(-)		Negative(-)		positive(+）	↑	Negative(-)		positive(+）	↑
male	Throat swab	4year	Acute bronchitis	Respiratory pathogens nucleic acid six	2023/11/15 19:39:00									Negative		Negative		Negative		Negative		Negative		Negative
female	sputum	6year	Acute bronchitis	Respiratory bacterial nucleic acid six	2023/11/15 22:11:00																					Negative(-)		Negative(-)		Negative(-)		Negative(-)		Negative(-)		positive(+）	↑
female	Throat swab	6year	Acute bronchitis	Respiratory pathogens nucleic acid six	2023/11/15 22:11:00									positive	↑	Negative		Negative		Negative		Negative		Negative
male	Throat swab	7year	Herpetic angina	Respiratory pathogens nucleic acid six	2023/11/15 23:19:00									Negative		Negative		Negative		Negative		Negative		Negative
female	Throat swab	9year7month	Acute bronchitis	Respiratory pathogens nucleic acid six	2023/11/15 23:54:00									Negative		Negative		Negative		Negative		positive	↑	positive	↑
male	sputum	1year5month	Laryngeal obstruction	Respiratory bacterial nucleic acid six	2023/11/15 4:33:00																					Negative(-)		Negative(-)		Negative(-)		positive(+）	↑	Negative(-)		positive(+）	↑
male	Throat swab	1year5month	Laryngeal obstruction	Respiratory pathogens nucleic acid six	2023/11/15 4:33:00									Negative		Negative		positive	↑	Negative		Negative		Negative
male	Throat swab	3year8month	Acute bronchitis	Respiratory pathogens nucleic acid six	2023/11/15 4:43:00								620502202003130013	Negative		Negative		Negative		Negative		Negative		Negative
male	Throat swab	3year10month	Acute bronchitis	Respiratory pathogens nucleic acid six	2023/11/15 6:08:00								620502201912180419	positive	↑	Negative		positive	↑	Negative		Negative		Negative
male	Throat swab	2year6month	Acute upper respiratory tract infection	Respiratory pathogens nucleic acid six	2023/11/15 7:12:00								620502202104164319	Negative		Negative		Negative		positive	↑	Negative		Negative
male	sputum	7year4month	Acute bronchitis	Respiratory bacterial nucleic acid six	2023/11/15 9:42:00																					Negative(-)		Negative(-)		Negative(-)		positive(+）	↑	Negative(-)		positive(+）	↑
male	Throat swab	7year4month	Acute bronchitis	Respiratory pathogens nucleic acid six	2023/11/15 9:42:00									Negative		Negative		Negative		Negative		Negative		Negative
female	sputum	3year1month	Acute bronchitis	Respiratory bacterial nucleic acid six	2023/11/16 10:39:00																					Negative(-)		Negative(-)		Negative(-)		positive(+）	↑	Negative(-)		positive(+）	↑
female	Throat swab	3year1month	Acute bronchitis	Respiratory pathogens nucleic acid six	2023/11/16 10:39:00									Negative		Negative		Negative		Negative		Negative		Negative
female	sputum	7year4month	Acute bronchitis	Respiratory bacterial nucleic acid six	2023/11/16 10:54:00																					Negative(-)		Negative(-)		Negative(-)		positive(+）	↑	Negative(-)		positive(+）	↑
female	Throat swab	7year4month	Acute bronchitis	Respiratory pathogens nucleic acid six	2023/11/16 10:54:00									positive	↑	Negative		Negative		Negative		Negative		Negative
female	Throat swab	7year	pneumonia	Respiratory pathogens nucleic acid six	2023/11/16 11:27:00									Negative		Negative		Negative		Negative		Negative		positive	↑
female	Throat swab	1year4month	acuteAsthmatic bronchus	Respiratory pathogens nucleic acid six	2023/11/16 11:45:00									Negative		Negative		positive	↑	Negative		Negative		Negative
male	Throat swab	3year6month	pneumonia	Respiratory pathogens nucleic acid six	2023/11/16 12:28:00									Negative		Negative		Negative		Negative		Negative		positive	↑
female	Throat swab	10year11month	Acute bronchitis	Respiratory pathogens nucleic acid six	2023/11/16 12:44:00									Negative		Negative		Negative		Negative		Negative		positive	↑
female	Throat swab	3year9month	Acute upper respiratory tract infection	Respiratory pathogens nucleic acid six	2023/11/16 13:05:00									positive	↑	Negative		Negative		Negative		Negative		Negative
female	Throat swab	2month13day	pneumonia	Respiratory pathogens nucleic acid six	2023/11/16 14:47:00									Negative		Negative		positive	↑	Negative		Negative		Negative
male	Throat swab	4year2month	Acute bronchitis	Respiratory pathogens nucleic acid six	2023/11/16 15:31:00									positive	↑	Negative		Negative		Negative		Negative		Negative
male	Throat swab	8month	pneumonia	Respiratory pathogens nucleic acid six	2023/11/16 15:31:00									Negative		Negative		positive	↑	Negative		Negative		Negative
female	sputum	1year3month	pneumonia	Respiratory bacterial nucleic acid six	2023/11/16 16:11:00																					Negative(-)		Negative(-)		Negative(-)		positive(+）	↑	Negative(-)		positive(+）	↑
female	Throat swab	1year3month	pneumonia	Respiratory pathogens nucleic acid six	2023/11/16 16:11:00									Negative		Negative		Negative		positive	↑	Negative		Negative
male	Throat swab	1year10month	Childhood asthma	Respiratory pathogens nucleic acid six	2023/11/16 16:24:00									Negative		Negative		Negative		Negative		Negative		Negative
female	Throat swab	9year11month	pneumonia	Respiratory pathogens nucleic acid six	2023/11/16 16:35:00									positive	↑	Negative		Negative		Negative		Negative		positive	↑
female	Throat swab	5year11month	pneumonia	Respiratory pathogens nucleic acid six	2023/11/16 16:58:00									Negative		Negative		Negative		Negative		positive	↑	Negative(-)
male	Throat swab	1month18day	severe casepneumonia	Respiratory pathogens nucleic acid six	2023/11/16 17:23:00									Negative		Negative		positive	↑	Negative		Negative		Negative
male	Throat swab	3year6month	Acute bronchitis	Respiratory pathogens nucleic acid six	2023/11/16 17:35:00									Negative(-)		Negative		Negative		Negative		Negative		Negative
female	Throat swab	3year6month	Acute bronchitis	Respiratory pathogens nucleic acid six	2023/11/16 18:43:00								621225202005160063	Negative		Negative		positive	↑	Negative		Negative		Negative
male	sputum	5year2month	Acute bronchitis	Respiratory bacterial nucleic acid six	2023/11/16 18:51:00																					Negative(-)		Negative(-)		Negative(-)		positive(+）	↑	Negative(-)		positive(+）	↑
male	Throat swab	5year2month	Acute bronchitis	Respiratory pathogens nucleic acid six	2023/11/16 18:51:00									Negative		Negative		positive	↑	positive	↑	Negative		positive	↑
male	Throat swab	6month15day	pneumonia	Respiratory pathogens nucleic acid six	2023/11/16 19:11:00									Negative		Negative		Negative		Negative		Negative		Negative
male	Throat swab	6year5month	Acute bronchitis	Respiratory pathogens nucleic acid six	2023/11/16 19:18:00									positive	↑	Negative		Negative		Negative		Negative		Negative
female	sputum	6year11month	Acute upper respiratory tract infection	Respiratory bacterial nucleic acid six	2023/11/16 19:30:00																					Negative(-)		Negative(-)		Negative(-)		Negative(-)		Negative(-)		positive(+）	↑
female	Throat swab	6year11month	Acute upper respiratory tract infection	Respiratory pathogens nucleic acid six	2023/11/16 19:30:00									positive	↑	Negative		Negative		Negative		Negative		Negative
male	Throat swab	7year2month	Acute bronchitis	Respiratory pathogens nucleic acid six	2023/11/16 20:44:00								620502201608202310	positive	↑	Negative		Negative		positive	↑	Negative		positive	↑
female	Throat swab	3month2day	bronchuspneumonia	Respiratory pathogens nucleic acid six	2023/11/16 21:50:00									Negative		Negative		positive	↑	Negative		Negative		Negative
male	sputum	1year6month	Acute laryngotracheitis	Respiratory bacterial nucleic acid six	2023/11/16 21:58:00																					Negative(-)		Negative(-)		Negative(-)		positive(+）	↑	Negative(-)		positive(+）	↑
male	Throat swab	1year6month	Acute laryngotracheitis	Respiratory pathogens nucleic acid six	2023/11/16 21:58:00									Negative(-)		Negative		Negative		Negative		Negative		positive	↑
female	sputum	6year9month	Acute bronchitis	Respiratory bacterial nucleic acid six	2023/11/16 22:07:00																					Negative(-)		Negative(-)		Negative(-)		Negative(-)		Negative(-)		positive(+）	↑
female	Throat swab	6year9month	Acute bronchitis	Respiratory pathogens nucleic acid six	2023/11/16 22:07:00									positive	↑	Negative		Negative		Negative		Negative		positive	↑
male	Throat swab	7year9month	Acute bronchitis	Respiratory pathogens nucleic acid six	2023/11/16 3:09:00									Negative		Negative		Negative		Negative		positive	↑	positive	↑
male	sputum	3year8month	Acute bronchitis	Respiratory bacterial nucleic acid six	2023/11/16 7:52:00																					Negative(-)		Negative(-)		positive(+）	↑	Negative(-)		Negative(-)		positive(+）	↑
male	Throat swab	3year8month	Acute bronchitis	Respiratory pathogens nucleic acid six	2023/11/16 7:52:00									Negative		Negative		Negative		Negative		Negative		Negative
male	Throat swab	1year	severe casepneumonia	Respiratory pathogens nucleic acid six	2023/11/16 8:20:00									Negative		Negative		Negative		Negative		Negative		Negative
female	Throat swab	2year1month	Acute upper respiratory tract infection	Respiratory pathogens nucleic acid six	2023/11/16 8:21:00									Negative		positive	↑	Negative		Negative		Negative		Negative
male	Throat swab	10year7month	pneumoniapneumonia	Respiratory pathogens nucleic acid six	2023/11/16 9:27:00									Negative		Negative		Negative		Negative		Negative		positive	↑
male	Throat swab	7year3month	fever	Respiratory pathogens nucleic acid six	2023/11/16 9:37:00								620502201608091614	positive	↑	Negative		Negative		Negative		Negative		Negative
female	Throat swab	1year1month	Acute laryngitis	Respiratory pathogens nucleic acid six	2023/11/16 9:45:00									positive	↑	Negative		Negative		positive	↑	Negative		Negative
female	Throat swab	4year6month	fever	Respiratory pathogens nucleic acid six	2023/11/16 9:56:00								620502201905020046	Negative		Negative		Negative		Negative		Negative		Negative
male	Throat swab	12year	pneumoniapneumonia	Respiratory pathogens nucleic acid six	2023/11/17 0:22:00									positive	↑	Negative		Negative		Negative		Negative		Negative
female	sputum	1year6month	pneumonia	Respiratory bacterial nucleic acid six	2023/11/17 0:52:00																					Negative(-)		Negative(-)		Negative(-)		positive(+）	↑	Negative(-)		positive(+）	↑
female	Throat swab	1year6month	fever	Respiratory pathogens nucleic acid six	2023/11/17 0:52:00									Negative		Negative		Negative		Negative		Negative		Negative
female	sputum	4year5month	Acute bronchitis	Respiratory bacterial nucleic acid six	2023/11/17 1:37:00																					Negative(-)		Negative(-)		Negative(-)		positive(+）	↑	Negative(-)		positive(+）	↑
female	Throat swab	4year5month	Acute bronchitis	Respiratory pathogens nucleic acid six	2023/11/17 1:37:00									Negative		Negative		Negative		positive	↑	Negative		Negative
female	sputum	7year8month	Acute bronchitis	Respiratory bacterial nucleic acid six	2023/11/17 10:22:00								620502201603160043													Negative(-)				Negative(-)		Negative(-)		Negative(-)		Negative(-)
female	Throat swab	7year8month	Acute bronchitis	Respiratory pathogens nucleic acid six	2023/11/17 10:22:00								620502201603160043	positive	↑	positive	↑	Negative		Negative		Negative		Negative
female	sputum	6year11month	Acute bronchitis	Respiratory bacterial nucleic acid six	2023/11/17 10:33:00																					Negative(-)		Negative(-)		Negative(-)		positive(+）	↑	Negative(-)		positive(+）	↑
female	Throat swab	6year11month	Acute bronchitis	Respiratory pathogens nucleic acid six	2023/11/17 10:33:00									Negative		Negative		Negative		positive	↑	Negative		Negative
male	Throat swab	6year8month	pneumonia	Respiratory pathogens nucleic acid six	2023/11/17 10:44:00									Negative		Negative		Negative		positive	↑	Negative		positive	↑
male	Throat swab	3year10month	Acute bronchitis	Respiratory pathogens nucleic acid six	2023/11/17 10:59:00									positive	↑	Negative		Negative		Negative		Negative		Negative
male	Throat swab	2year5month	fever	Respiratory pathogens nucleic acid six	2023/11/17 11:28:00								620522202106083518	Negative		Negative		Negative		positive	↑	Negative		Negative
female	sputum	9month7day	bronchuspneumonia	Respiratory bacterial nucleic acid six	2023/11/17 11:42:00																					Negative(-)		Negative(-)		Negative(-)		positive(+）	↑	Negative(-)		positive(+）	↑
female	Throat swab	9month5day	bronchuspneumonia	Respiratory pathogens nucleic acid six	2023/11/17 11:42:00									positive	↑	Negative		Negative		Negative		Negative		Negative
male	Throat swab	10month5day	acuteAsthmatic bronchus	Respiratory pathogens nucleic acid six	2023/11/17 12:07:00									Negative		Negative		Negative		Negative		Negative		Negative
male	Throat swab	1year2month	bronchuspneumonia	Respiratory pathogens nucleic acid six	2023/11/17 13:03:00									Negative		Negative		positive	↑	Negative		Negative		Negative
female	sputum	7year1month	pneumonia	Respiratory bacterial nucleic acid six	2023/11/17 13:05:00																					Negative(-)		Negative(-)		Negative(-)		positive(+）	↑	Negative(-)		positive(+）	↑
female	Throat swab	7year1month	pneumonia	Respiratory pathogens nucleic acid six	2023/11/17 13:05:00									Negative		Negative		positive	↑	Negative		Negative		positive	↑
male	Throat swab	1year	pneumonia	Respiratory pathogens nucleic acid six	2023/11/17 13:09:00									positive	↑	Negative		Negative		positive	↑	Negative		Negative
female	Throat swab	3year9month	Acute bronchitis	Respiratory pathogens nucleic acid six	2023/11/17 13:14:00									Negative		Negative		Negative		Negative		positive	↑	Negative
male	Throat swab	11month3day	pneumonia	Respiratory pathogens nucleic acid six	2023/11/17 14:03:00									Negative		Negative		Negative		positive	↑	Negative		Negative
female	Throat swab	4year6month	Acute bronchitis	Respiratory pathogens nucleic acid six	2023/11/17 15:41:00									positive	↑	Negative		Negative		positive	↑	Negative		Negative
female	Throat swab	3year5month	bronchus	Respiratory pathogens nucleic acid six	2023/11/17 16:14:00									positive	↑	Negative		Negative		positive	↑	Negative		Negative
female	Throat swab	6year3month	bronchus	Respiratory pathogens nucleic acid six	2023/11/17 16:20:00									positive	↑	Negative		Negative		positive	↑	Negative		positive	↑
female	Throat swab	7year5month	pneumonia	Respiratory pathogens nucleic acid six	2023/11/17 16:25:00									positive	↑	Negative		Negative		positive	↑	Negative		Negative
male	Throat swab	1year1month	acutetonsillitis	Respiratory pathogens nucleic acid six	2023/11/17 16:31:00									Negative		Negative		Negative		Negative		positive	↑	Negative
male	sputum	7year6month	pneumonia	Respiratory bacterial nucleic acid six	2023/11/17 16:32:00																					Negative(-)		Negative(-)		Negative(-)		positive(+）	↑	Negative(-)		positive(+）	↑
male	Throat swab	7year6month	pneumonia	Respiratory pathogens nucleic acid six	2023/11/17 16:32:00									Negative		Negative		Negative		Negative		Negative		positive	↑
male	sputum	9year	pneumonia	Respiratory bacterial nucleic acid six	2023/11/17 16:37:00																					Negative(-)		Negative(-)		Negative(-)		positive(+）	↑	Negative(-)		positive(+）	↑
male	Throat swab	9year	pneumonia	Respiratory pathogens nucleic acid six	2023/11/17 16:37:00									Negative		Negative		Negative		Negative		Negative		positive	↑
male	Throat swab	7year2month	Acute bronchitis	Respiratory pathogens nucleic acid six	2023/11/17 17:03:00									Negative		Negative		Negative		Negative		Negative		positive	↑
male	sputum	9year5month	pneumonia	Respiratory bacterial nucleic acid six	2023/11/17 17:26:00																					Negative(-)		Negative(-)		Negative(-)		Negative(-)		Negative(-)		Negative(-)
male	Throat swab	9year5month	pneumonia	Respiratory pathogens nucleic acid six	2023/11/17 17:26:00									Negative		Negative		Negative		Negative		positive	↑	positive	↑
female	sputum	6year7month	pneumonia	Respiratory bacterial nucleic acid six	2023/11/17 17:45:00																					Negative(-)		Negative(-)		Negative(-)		positive(+）	↑	Negative(-)		positive(+）	↑
female	Throat swab	6year7month	pneumonia	Respiratory pathogens nucleic acid six	2023/11/17 17:45:00									Negative		Negative		Negative		Negative		Negative		positive	↑
male	Throat swab	1year9month	Acute laryngotracheitis	Respiratory pathogens nucleic acid six	2023/11/17 17:48:00									Negative		Negative		positive	↑	positive	↑	Negative		Negative
female	Throat swab	1year4month	bronchuspneumonia	Respiratory pathogens nucleic acid six	2023/11/17 17:51:00									Negative		Negative		Negative		Negative		Negative		Negative
female	Throat swab	9year8month	Acute bronchitis	Respiratory pathogens nucleic acid six	2023/11/17 17:53:00									Negative		Negative		Negative		Negative		Negative		Negative
male	Throat swab	6year6month	Acute bronchitis	Respiratory pathogens nucleic acid six	2023/11/17 17:57:00									Negative		Negative		Negative		Negative		Negative		positive	↑
male	sputum	7year2month	Acute bronchitis	Respiratory bacterial nucleic acid six	2023/11/17 18:18:00																					Negative(-)		Negative(-)		Negative(-)		positive(+）	↑	Negative(-)		positive(+）	↑
male	Throat swab	7year2month	Acute bronchitis	Respiratory pathogens nucleic acid six	2023/11/17 18:18:00									positive	↑	Negative		Negative		positive	↑	Negative		positive	↑
female	Throat swab	13year	Acute bronchitis	Respiratory pathogens nucleic acid six	2023/11/17 19:11:00									Negative		Negative		Negative		Negative		Negative		positive	↑
female	Throat swab	7month19day	pneumonia	Respiratory pathogens nucleic acid six	2023/11/17 19:24:00									Negative		Negative		Negative		positive	↑	Negative		Negative
female	sputum	8year11month	Acute bronchitis	Respiratory bacterial nucleic acid six	2023/11/17 19:31:00																					Negative(-)		Negative(-)		Negative(-)		positive(+）	↑	Negative(-)		positive(+）	↑
female	Throat swab	8year11month	Acute bronchitis	Respiratory pathogens nucleic acid six	2023/11/17 19:31:00									Negative		Negative		positive	↑	Negative		Negative		positive	↑
male	Throat swab	5year1month	fever	Respiratory pathogens nucleic acid six	2023/11/17 19:57:00									Negative		Negative		Negative		positive	↑	Negative		Negative
male	Throat swab	5year	Acute bronchitis	Respiratory pathogens nucleic acid six	2023/11/17 20:12:00									Negative		Negative		Negative		positive	↑	Negative		positive	↑
male	Throat swab	4year2month	Acute upper respiratory tract infection	Respiratory pathogens nucleic acid six	2023/11/17 22:34:00									Negative		Negative		positive	↑	Negative		Negative		Negative
male	sputum	8year10month	Acute bronchitis	Respiratory bacterial nucleic acid six	2023/11/17 3:14:00																					Negative(-)		Negative(-)		Negative(-)		positive(+）	↑	Negative(-)		positive(+）	↑
male	Throat swab	8year10month	Acute bronchitis	Respiratory pathogens nucleic acid six	2023/11/17 3:14:00									positive	↑	Negative		Negative		Negative(-)		Negative		Negative
female	sputum	1year	Herpetic angina	Respiratory bacterial nucleic acid six	2023/11/17 3:31:00																					Negative(-)		Negative(-)		Negative(-)		positive(+）	↑	Negative(-)		positive(+）	↑
female	Throat swab	1year	Herpetic angina	Respiratory pathogens nucleic acid six	2023/11/17 3:31:00									Negative		Negative		Negative		positive(+）	↑	positive	↑	Negative
male	Throat swab	2year1month	Febrile convulsion	Respiratory pathogens nucleic acid six	2023/11/17 3:52:00									positive	↑	Negative		Negative		Negative		Negative		Negative
male	sputum	2year	Febrile convulsion	Respiratory bacterial nucleic acid six	2023/11/17 4:33:00																					Negative(-)		Negative(-)		Negative(-)		Negative(-)		Negative(-)		Negative(-)
male	Throat swab	2year	Febrile convulsion	Respiratory pathogens nucleic acid six	2023/11/17 4:33:00									Negative		Negative		positive	↑	Negative		Negative		positive	↑
male	Throat swab	10month21day	Asthmatic bronchuspneumonia	Respiratory pathogens nucleic acid six	2023/11/17 4:38:00									Negative		Negative		Negative		Negative		Negative		Negative
female	sputum	6year6month	fever	Respiratory bacterial nucleic acid six	2023/11/17 5:00:00																					Negative(-)		Negative(-)		Negative(-)		positive(+）	↑	Negative(-)		Negative(-)
female	Throat swab	6year6month	fever	Respiratory pathogens nucleic acid six	2023/11/17 5:00:00									Negative		positive	↑	Negative		Negative		Negative		Negative
male	sputum	3year9month	Acute laryngitis	Respiratory bacterial nucleic acid six	2023/11/17 7:00:00																					Negative(-)		Negative(-)		Negative(-)		Negative(-)		Negative(-)		positive(+）	↑
male	Throat swab	3year9month	Acute laryngitis	Respiratory pathogens nucleic acid six	2023/11/17 7:00:00									positive	↑	Negative		Negative		Negative		Negative		Negative
male	Throat swab	8year7month	fever	Respiratory pathogens nucleic acid six	2023/11/17 7:25:00								620502201504147732	Negative		Negative		Negative		positive	↑	positive	↑	Negative
male	Throat swab	9year1month	Routine health checks for children	Respiratory pathogens nucleic acid six	2023/11/17 8:52:00								620502201409290434	Negative		Negative		Negative		positive	↑	Negative		Negative
female	Throat swab	9year1month	Acute bronchitis	Respiratory pathogens nucleic acid six	2023/11/17 9:06:00								620502201409250723	Negative		Negative		Negative		Negative		Negative		Negative
female	sputum	5year2month	Lobarpneumonia	Respiratory bacterial nucleic acid six	2023/11/18 0:00:00																					Negative(-)		Negative(-)		Negative(-)		positive(+）	↑	Negative(-)		Negative(-)
female	Throat swab	5year2month	Lobarpneumonia	Respiratory pathogens nucleic acid six	2023/11/18 0:00:00									Negative		Negative		Negative		positive	↑	Negative		positive	↑
male	sputum	4year5month	Acute upper respiratory tract infection	Respiratory bacterial nucleic acid six	2023/11/18 10:45:00																					Negative(-)		Negative(-)		Negative(-)		Negative(-)		Negative(-)		Negative(-)
male	Throat swab	4year5month	Acute upper respiratory tract infection	Respiratory pathogens nucleic acid six	2023/11/18 10:45:00									Negative		Negative		Negative		positive	↑	Negative		Negative
male	sputum	4year	Acute bronchitis	Respiratory bacterial nucleic acid six	2023/11/18 11:33:00																					Negative(-)		Negative(-)		Negative(-)		positive(+）	↑	Negative(-)		positive(+）	↑
male	Throat swab	4year	Acute bronchitis	Respiratory pathogens nucleic acid six	2023/11/18 11:33:00									Negative		Negative		Negative		Negative		Negative		Negative
female	Throat swab	2year	bronchuspneumonia	Respiratory pathogens nucleic acid six	2023/11/18 12:06:00									Negative		Negative		positive	↑	positive	↑	Negative		Negative
male	Throat swab	5month21day	bronchus	Respiratory pathogens nucleic acid six	2023/11/18 12:12:00									Negative		Negative		Negative		Negative		Negative		Negative
female	sputum	11year	pneumonia	Respiratory bacterial nucleic acid six	2023/11/18 13:18:00																					Negative(-)		Negative(-)		Negative(-)		Negative(-)		Negative(-)		positive(+）	↑
female	Throat swab	10year11month	pneumonia	Respiratory pathogens nucleic acid six	2023/11/18 13:18:00									Negative		Negative		Negative		Negative		Negative		positive	↑
male	Throat swab	2year4month	acutetonsillitis	Respiratory pathogens nucleic acid six	2023/11/18 13:21:00									Negative		Negative		Negative		Negative		positive	↑	Negative
male	sputum	10month15day	Asthmatic bronchuspneumonia	Respiratory bacterial nucleic acid six	2023/11/18 13:35:00																					Negative(-)		Negative(-)		Negative(-)		Negative(-)		Negative(-)		positive(+）	↑
male	Throat swab	10month14day	Asthmatic bronchuspneumonia	Respiratory pathogens nucleic acid six	2023/11/18 13:35:00									Negative		Negative		positive	↑	Negative		Negative		Negative
male	sputum	2year3month	Acute bronchitis	Respiratory bacterial nucleic acid six	2023/11/18 14:47:00																					Negative(-)		Negative(-)		Negative(-)		Negative(-)		Negative(-)		positive(+）	↑
male	Throat swab	2year3month	Acute bronchitis	Respiratory pathogens nucleic acid six	2023/11/18 14:47:00									Negative		Negative		Negative		Negative		Negative		Negative
male	Throat swab	6year9month	Acute bronchitis	Respiratory pathogens nucleic acid six	2023/11/18 15:18:00									Negative		Negative		Negative		Negative		Negative		Negative
female	sputum	6year10month	Acute bronchitis	Respiratory bacterial nucleic acid six	2023/11/18 15:52:00																					Negative(-)		Negative(-)		Negative(-)		positive(+）	↑	Negative(-)		positive(+）	↑
female	Throat swab	6year10month	Acute bronchitis	Respiratory pathogens nucleic acid six	2023/11/18 15:52:00									Negative		Negative		Negative		Negative		Negative		Negative
male	Throat swab	13year	Acute bronchitis	Respiratory pathogens nucleic acid six	2023/11/18 15:53:00									positive	↑	Negative		Negative		Negative		Negative		Negative
male	Throat swab	8month25day	acuteAsthmatic bronchus	Respiratory pathogens nucleic acid six	2023/11/18 16:30:00									Negative		Negative		positive	↑	Negative		Negative		Negative
female	sputum	9month28day	Asthmatic bronchuspneumonia	Respiratory bacterial nucleic acid six	2023/11/18 16:41:00																					Negative(-)		positive(+）	↑	Negative(-)		Negative(-)		positive(+）	↑	positive(+）	↑
female	Throat swab	9month27day	Asthmatic bronchuspneumonia	Respiratory pathogens nucleic acid six	2023/11/18 16:41:00									Negative		Negative		positive	↑	positive	↑	Negative		Negative
male	sputum	10year9month	Acute bronchitis	Respiratory bacterial nucleic acid six	2023/11/18 16:45:00																					Negative(-)		Negative(-)		Negative(-)		positive(+）	↑	Negative(-)		Negative(-)
male	Throat swab	10year9month	Acute bronchitis	Respiratory pathogens nucleic acid six	2023/11/18 16:45:00									Negative		Negative		Negative		Negative		Negative		positive	↑
female	Throat swab	6year7month	Lobarpneumonia	Respiratory pathogens nucleic acid six	2023/11/18 16:46:00									Negative		Negative		Negative		Negative		Negative		positive	↑
male	sputum	5year	Acute bronchitis	Respiratory bacterial nucleic acid six	2023/11/18 18:36:00																					Negative(-)		Negative(-)		Negative(-)		positive(+）	↑	Negative(-)		Negative(-)
male	Throat swab	5year	Acute bronchitis	Respiratory pathogens nucleic acid six	2023/11/18 18:36:00									Negative		Negative		Negative		positive	↑	Negative		Negative
female	sputum	1year6month	pneumonia	Respiratory bacterial nucleic acid six	2023/11/18 18:39:00																					Negative(-)		Negative(-)		Negative(-)		Negative(-)		Negative(-)		Negative(-)
female	Throat swab	1year6month	pneumonia	Respiratory pathogens nucleic acid six	2023/11/18 18:39:00									Negative		Negative		positive	↑	Negative		Negative		Negative
female	Throat swab	6year3month	Acute bronchitis	Respiratory pathogens nucleic acid six	2023/11/18 18:40:00									Negative		Negative		Negative		positive	↑	Negative		Negative
male	sputum	3year2month	pneumonia	Respiratory bacterial nucleic acid six	2023/11/18 18:47:00																					Negative(-)		Negative(-)		Negative(-)		positive(+）	↑	Negative(-)		positive(+）	↑
male	Throat swab	3year2month	pneumonia	Respiratory pathogens nucleic acid six	2023/11/18 18:47:00									Negative		Negative		positive	↑	Negative		Negative		Negative
male	Throat swab	2year7month	Acute upper respiratory tract infection	Respiratory pathogens nucleic acid six	2023/11/18 2:39:00									positive	↑	Negative		Negative		Negative		Negative		Negative
female	sputum	4year3month	Acute bronchitis	Respiratory bacterial nucleic acid six	2023/11/18 21:45:00																					Negative(-)		Negative(-)		Negative(-)		positive(+）	↑	Negative(-)		positive(+）	↑
female	Throat swab	4year3month	Acute bronchitis	Respiratory pathogens nucleic acid six	2023/11/18 21:45:00									positive	↑	Negative		Negative		Negative		Negative		Negative
male	sputum	8year9month	pneumonia	Respiratory bacterial nucleic acid six	2023/11/18 22:28:00																					Negative(-)		Negative(-)		Negative(-)		positive(+）	↑	Negative(-)		positive(+）	↑
male	Throat swab	8year9month	pneumonia	Respiratory pathogens nucleic acid six	2023/11/18 22:28:00									Negative		Negative		Negative		Negative		Negative		positive	↑
male	Throat swab	10year1month	Acute bronchitis	Respiratory pathogens nucleic acid six	2023/11/18 22:32:00									positive	↑	Negative		Negative		positive	↑	Negative		positive	↑
male	Throat swab	4year2month	Acute bronchitis	Respiratory pathogens nucleic acid six	2023/11/18 23:48:00									Negative		Negative		Negative		Negative		Negative		Negative
male	Throat swab	4year2month	Acute bronchitis	Respiratory pathogens nucleic acid six	2023/11/18 23:53:00									Negative		Negative		Negative		Negative		positive	↑	Negative
female	Throat swab	1year3month	Acute bronchitis	Respiratory pathogens nucleic acid six	2023/11/18 6:48:00									Negative		Negative		positive	↑	Negative		Negative		Negative
male	Throat swab	4year11month	Acute bronchitis	Respiratory pathogens nucleic acid six	2023/11/18 9:56:00									Negative		Negative		Negative		positive	↑	Negative		Negative
male	Throat swab	5year10month	Acute bronchitis	Respiratory pathogens nucleic acid six	2023/11/18 9:57:00									positive	↑	Negative		Negative		Negative		Negative		Negative
male	sputum	3year9month	pneumonia	Respiratory bacterial nucleic acid six	2023/11/19 0:30:00																					Negative(-)		Negative(-)		Negative(-)		Negative(-)		Negative(-)		positive(+）	↑
male	Throat swab	3year9month	pneumonia	Respiratory pathogens nucleic acid six	2023/11/19 0:30:00									positive	↑	Negative		Negative		Negative		Negative		positive	↑
male	Throat swab	12year	Acute upper respiratory tract infection	Respiratory pathogens nucleic acid six	2023/11/19 1:51:00									Negative		Negative		Negative		Negative		Negative		Negative
female	Throat swab	9year	Acute upper respiratory tract infection	Respiratory pathogens nucleic acid six	2023/11/19 10:37:00								620502201411190440	positive	↑	Negative		Negative		Negative		Negative		Negative
male	Throat swab	1year11month	dyspnea	Respiratory pathogens nucleic acid six	2023/11/19 10:57:00									Negative		Negative		Negative		Negative		Negative		Negative
female	Throat swab	1year8month	pneumonia	Respiratory pathogens nucleic acid six	2023/11/19 11:13:00									positive	↑	Negative		Negative		Negative		Negative		Negative
male	sputum	13year	Acute bronchitis	Respiratory bacterial nucleic acid six	2023/11/19 11:47:00																					Negative(-)		Negative(-)		Negative(-)		positive(+）	↑	Negative(-)		Negative(-)
male	Throat swab	13year	Acute bronchitis	Respiratory pathogens nucleic acid six	2023/11/19 11:47:00									Negative		positive	↑	Negative		Negative		Negative		Negative
male	Throat swab	9year10month	pneumoniapneumonia	Respiratory pathogens nucleic acid six	2023/11/19 12:46:00									Negative		Negative		Negative		Negative(-)		Negative		positive	↑
male	Throat swab	5year8month	dyspnea	Respiratory pathogens nucleic acid six	2023/11/19 13:13:00									Negative		positive	↑	Negative		Negative		Negative		Negative
female	Throat swab	1year1month	pneumonia	Respiratory pathogens nucleic acid six	2023/11/19 13:34:00									Negative		Negative		Negative		Negative		Negative		Negative
male	sputum	1year4month	pneumonia	Respiratory bacterial nucleic acid six	2023/11/19 14:42:00																					Negative(-)		Negative(-)		Negative(-)		positive(+）	↑	Negative(-)		positive(+）	↑
male	Throat swab	1year4month	pneumonia	Respiratory pathogens nucleic acid six	2023/11/19 14:42:00									Negative		Negative		positive	↑	Negative		Negative		Negative
female	Throat swab	9year9month	fever	Respiratory pathogens nucleic acid six	2023/11/19 16:14:00									Negative		Negative		Negative		positive	↑	Negative		Negative
male	sputum	6year1month	bronchuspneumonia	Respiratory bacterial nucleic acid six	2023/11/19 16:32:00																					Negative(-)		Negative(-)		Negative(-)		positive(+）	↑	Negative(-)		positive(+）	↑
male	Throat swab	6year1month	bronchuspneumonia	Respiratory pathogens nucleic acid six	2023/11/19 16:32:00									Negative		Negative		Negative		Negative		Negative		positive	↑
male	sputum	7month21day	pneumonia	Respiratory bacterial nucleic acid six	2023/11/19 17:26:00																					Negative(-)		positive(+）	↑	Negative(-)		Negative(-)		Negative(-)		positive(+）	↑
male	Throat swab	7month21day	pneumonia	Respiratory pathogens nucleic acid six	2023/11/19 17:26:00									Negative		Negative		positive	↑	Negative		Negative		Negative
male	Throat swab	9year	pneumoniapneumonia	Respiratory pathogens nucleic acid six	2023/11/19 17:47:00									Negative		positive	↑	Negative		Negative		Negative		Negative
male	Throat swab	5year8month	Acute upper respiratory tract infection	Respiratory pathogens nucleic acid six	2023/11/19 17:54:00									positive	↑	Negative		positive	↑	Negative		Negative		Negative
female	Throat swab	8year1month	Acute bronchitis	Respiratory pathogens nucleic acid six	2023/11/19 18:03:00									Negative		positive	↑	Negative		Negative		Negative		Negative
male	Throat swab	9year11month	bronchus	Respiratory pathogens nucleic acid six	2023/11/19 18:13:00									Negative		Negative		Negative		positive	↑	Negative		positive	↑
female	Throat swab	5year10month	fever	Respiratory pathogens nucleic acid six	2023/11/19 19:15:00									positive	↑	Negative		positive	↑	positive	↑	Negative		Negative
female	Throat swab	10year	pneumonia	Respiratory pathogens nucleic acid six	2023/11/19 19:24:00									positive	↑	Negative		Negative		Negative		Negative		positive	↑
female	Throat swab	6year3month	Acute bronchitis	Respiratory pathogens nucleic acid six	2023/11/19 19:37:00									Negative		positive	↑	Negative		Negative		positive	↑	Negative
female	sputum	2year9month	Acute upper respiratory tract infection	Respiratory bacterial nucleic acid six	2023/11/19 2:20:00																					Negative(-)		Negative(-)		Negative(-)		positive(+）	↑	Negative(-)		positive(+）	↑
female	Throat swab	2year9month	Acute upper respiratory tract infection	Respiratory pathogens nucleic acid six	2023/11/19 2:20:00									positive	↑	Negative		Negative		Negative		Negative		Negative
male	Throat swab	5year5month	Acute bronchitis	Respiratory pathogens nucleic acid six	2023/11/19 20:49:00								620502201805251314	positive	↑	Negative		positive	↑	Negative		Negative		Negative
male	Throat swab	1year4month	severe casepneumonia	Respiratory pathogens nucleic acid six	2023/11/19 21:58:00									Negative		Negative		Negative		Negative(-)		positive	↑	Negative
female	Throat swab	25day10hour	congenitalpneumonia	Respiratory pathogens nucleic acid six	2023/11/19 22:21:00									Negative		Negative		positive	↑	Negative		Negative		positive	↑
female	sputum	25day10hour	pneumonia	Respiratory bacterial nucleic acid six	2023/11/19 22:21:00																					Negative(-)		Negative(-)		Negative(-)		Negative(-)		Negative(-)		Negative(-)
female	Throat swab	4year10month	Acute bronchitis	Respiratory pathogens nucleic acid six	2023/11/19 23:43:00								620502201812201622	positive	↑	Negative		Negative		positive	↑	Negative		Negative
male	Throat swab	5month2day	Infantile diarrhea	Respiratory pathogens nucleic acid six	2023/11/19 23:54:00									Negative		Negative		Negative		Negative		Negative		positive(+)	↑
male	Throat swab	4year5month	pneumonia	Respiratory pathogens nucleic acid six	2023/11/19 8:17:00									Negative		Negative		positive	↑	positive	↑	Negative		positive	↑
male	Throat swab	4year2month	Acute upper respiratory tract infection	Respiratory pathogens nucleic acid six	2023/11/19 9:39:00									Negative		positive	↑	Negative		positive	↑	Negative		Negative
female	sputum	11year8month	Lobarpneumonia	Respiratory bacterial nucleic acid six	2023/11/19 9:40:00																					Negative(-)		Negative(-)		Negative(-)		positive(+）	↑	Negative(-)		positive(+）	↑
female	Throat swab	11year8month	Lobarpneumonia	Respiratory pathogens nucleic acid six	2023/11/19 9:40:00									Negative		Negative		Negative		Negative		Negative		positive	↑
male	sputum	4year6month	pneumonia	Respiratory bacterial nucleic acid six	2023/11/19 9:44:00																					Negative(-)		Negative(-)		Negative(-)		positive(+）	↑	Negative(-)		positive(+）	↑
male	Throat swab	4year6month	pneumonia	Respiratory pathogens nucleic acid six	2023/11/19 9:44:00									Negative		Negative		Negative		Negative		Negative		Negative
female	Throat swab	2year8month	Acute laryngotracheitis	Respiratory pathogens nucleic acid six	2023/11/19 9:50:00									Negative		Negative		Negative		Negative		Negative		Negative
female	Throat swab	4year7month	pneumonia	Respiratory pathogens nucleic acid six	2023/11/2 0:08:00									Negative(-)		Negative(-)		Negative(-)		Negative(-)		Negative(-)		positive(+)	↑
male	Throat swab	9month26day	Febrile convulsion	Respiratory pathogens nucleic acid six	2023/11/2 0:13:00									Negative(-)		Negative(-)		Negative(-)		Negative(-)		positive(+）	↑	Negative(-)
female	sputum	8year7month	Acute bronchitis	Respiratory bacterial nucleic acid six	2023/11/2 1:22:00																					Negative(-)		Negative(-)		Negative(-)		positive(+）	↑	Negative(-)		positive(+）	↑
female	Throat swab	8year7month	Acute bronchitis	Respiratory pathogens nucleic acid six	2023/11/2 1:22:00									Negative(-)		Negative(-)		Negative(-)		Negative(-)		Negative(-)		positive(+)	↑
female	sputum	3year8month	pneumonia	Respiratory bacterial nucleic acid six	2023/11/2 10:51:00																					Negative(-)		Negative(-)		Negative(-)		positive(+）	↑	Negative(-)		Negative(-)
female	Throat swab	3year8month	pneumonia	Respiratory pathogens nucleic acid six	2023/11/2 10:51:00									Negative		Negative		positive	↑	Negative		Negative		Negative
male	Throat swab	11year5month	Acute bronchitis	Respiratory pathogens nucleic acid six	2023/11/2 11:10:00									Negative		Negative		Negative		Negative		Negative		positive	↑
male	Throat swab	6year3month	pneumonia	Respiratory pathogens nucleic acid six	2023/11/2 11:38:00									Negative		Negative		Negative		Negative		Negative		positive	↑
male	sputum	6year9month	fever	Respiratory bacterial nucleic acid six	2023/11/2 11:43:00																					Negative(-)		Negative(-)		Negative(-)		positive(+）	↑	Negative(-)		Negative(-)
male	Throat swab	6year9month	fever	Respiratory pathogens nucleic acid six	2023/11/2 11:43:00									positive	↑	Negative		Negative		Negative		Negative		Negative
male	Throat swab	4year9month	Acute bronchitis	Respiratory pathogens nucleic acid six	2023/11/2 11:48:00								620502201901132016	Negative		Negative		positive	↑	Negative		positive	↑	Negative
female	Throat swab	1year8month	Acute bronchitis	Respiratory pathogens nucleic acid six	2023/11/2 11:51:00									Negative		Negative		positive	↑	Negative		positive	↑	Negative
male	Throat swab	4year11month	Acute bronchitis	Respiratory pathogens nucleic acid six	2023/11/2 13:16:00									Negative		Negative		Negative		Negative		Negative		Negative
female	sputum	1month3day	pneumonia	Respiratory bacterial nucleic acid six	2023/11/2 15:56:00								620502202309296622													Negative(-)		Negative(-)		positive(+）	↑	Negative(-)		Negative(-)		positive(+）	↑
female	Throat swab	1month3day	pneumonia	Respiratory pathogens nucleic acid six	2023/11/2 15:56:00								620502202309296622	Negative		Negative		Negative		Negative		Negative		Negative
female	Throat swab	7year8month	pneumonia	Respiratory pathogens nucleic acid six	2023/11/2 16:05:00									Negative		Negative		Negative		Negative		Negative		positive	↑
female	Throat swab	2year	Acute bronchitis	Respiratory pathogens nucleic acid six	2023/11/2 16:13:00									Negative		Negative		Negative		Negative		Negative		Negative
male	sputum	3year2month	Acute bronchitis	Respiratory bacterial nucleic acid six	2023/11/2 16:23:00																					Negative(-)		Negative(-)		Negative(-)		positive(+）	↑	Negative(-)		positive(+）	↑
male	Throat swab	3year2month	Acute bronchitis	Respiratory pathogens nucleic acid six	2023/11/2 16:23:00									positive	↑	Negative		Negative		Negative		positive	↑	Negative
female	Throat swab	3month25day	Acute bronchitis	Respiratory pathogens nucleic acid six	2023/11/2 16:24:00									Negative		Negative		positive	↑	Negative		Negative		Negative
female	sputum	3month25day	Acute bronchitis	Respiratory bacterial nucleic acid six	2023/11/2 16:25:00																					Negative(-)		Negative(-)		Negative(-)		Negative(-)		Negative(-)		positive(+）	↑
male	sputum	9year6month	Lobarpneumonia	Respiratory bacterial nucleic acid six	2023/11/2 16:35:00																					Negative(-)		Negative(-)		Negative(-)		Negative(-)		Negative(-)		positive(+）	↑
male	Throat swab	9year6month	Lobarpneumonia	Respiratory pathogens nucleic acid six	2023/11/2 16:35:00									Negative		Negative		Negative		Negative		Negative		positive	↑
male	Throat swab	9year3month	pneumonia	Respiratory pathogens nucleic acid six	2023/11/2 16:39:00									Negative		Negative		Negative		Negative		Negative		positive	↑
female	Throat swab	5year1month	pneumonia	Respiratory pathogens nucleic acid six	2023/11/2 17:06:00									Negative		Negative		Negative		Negative		Negative		Negative
female	sputum	11month6day	bronchuspneumonia	Respiratory bacterial nucleic acid six	2023/11/2 18:00:00																					Negative(-)		Negative(-)		positive(+）	↑	Negative(-)		Negative(-)		Negative(-)
female	Throat swab	11month6day	bronchuspneumonia	Respiratory pathogens nucleic acid six	2023/11/2 18:00:00									Negative		Negative		Negative		Negative		positive	↑	Negative
male	sputum	1year6month	Acute upper respiratory tract infection	Respiratory bacterial nucleic acid six	2023/11/2 19:40:00																					Negative(-)		Negative(-)		Negative(-)		positive(+）	↑	Negative(-)		Negative(-)
male	Throat swab	1year6month	Acute upper respiratory tract infection	Respiratory pathogens nucleic acid six	2023/11/2 19:40:00									Negative		Negative		Negative		Negative		Negative		Negative
female	Throat swab	7year2month	Lobarpneumonia	Respiratory pathogens nucleic acid six	2023/11/2 20:04:00									Negative		Negative		Negative		Negative		Negative		positive	↑
male	Throat swab	10year	Acute bronchitis	Respiratory pathogens nucleic acid six	2023/11/2 20:26:00									Negative		Negative		Negative		Negative		Negative		positive	↑
female	Throat swab	3month2day	pneumonia	Respiratory pathogens nucleic acid six	2023/11/2 20:34:00									Negative		Negative		positive	↑	Negative		Negative		Negative
male	sputum	4year2month	Acute bronchitis	Respiratory bacterial nucleic acid six	2023/11/2 20:53:00																					Negative(-)		Negative(-)		Negative(-)		Negative(-)		Negative(-)		positive(+）	↑
male	Throat swab	4year2month	Acute bronchitis	Respiratory pathogens nucleic acid six	2023/11/2 20:53:00									positive	↑	Negative		positive	↑	Negative		Negative		Negative
female	sputum	2year4month	Acute bronchitis	Respiratory bacterial nucleic acid six	2023/11/2 21:04:00																					Negative(-)		Negative(-)		Negative(-)		Negative(-)		Negative(-)		positive(+）	↑
female	Throat swab	2year4month	Acute bronchitis	Respiratory pathogens nucleic acid six	2023/11/2 21:04:00									positive	↑	Negative		positive	↑	Negative		positive	↑	Negative
female	Throat swab	2month14day	pneumonia	Respiratory pathogens nucleic acid six	2023/11/2 22:30:00									Negative		Negative		Negative		Negative		Negative		Negative
male	Throat swab	1year	pneumonia	Respiratory pathogens nucleic acid six	2023/11/2 23:09:00									Negative		Negative		Negative		Negative		Negative		Negative
female	sputum	1year9month	Asthmatic bronchuspneumonia	Respiratory bacterial nucleic acid six	2023/11/2 4:02:00																					Negative(-)		Negative(-)		Negative(-)		positive(+）	↑	Negative(-)		positive(+）	↑
female	Throat swab	1year9month	Asthmatic bronchuspneumonia	Respiratory pathogens nucleic acid six	2023/11/2 4:02:00									Negative(-)		Negative(-)		Negative(-)		Negative(-)		positive(+）	↑	Negative(-)
female	sputum	7year1month	pneumonia	Respiratory bacterial nucleic acid six	2023/11/2 9:48:00																					Negative(-)		positive(+）	↑	Negative(-)		Negative(-)		Negative(-)		Negative(-)
female	Throat swab	7year1month	pneumonia	Respiratory pathogens nucleic acid six	2023/11/2 9:48:00									Negative		Negative		Negative		Negative		Negative		positive	↑
female	Throat swab	7year2month	Acute upper respiratory tract infection	Respiratory pathogens nucleic acid six	2023/11/20 1:10:00								620503201609021227	Negative		Negative		Negative		positive	↑	Negative		Negative
female	Throat swab	3year2month	Acute bronchitis	Respiratory pathogens nucleic acid six	2023/11/20 1:18:00								620502202009202022	Negative		Negative		Negative		positive	↑	positive	↑	positive	↑
female	sputum	6year11month	Acute suppurative tonsillitis	Respiratory bacterial nucleic acid six	2023/11/20 10:15:00																					Negative(-)		Negative(-)		Negative(-)		positive(+）	↑	Negative(-)		positive(+）	↑
female	Throat swab	6year11month	Acute suppurative tonsillitis	Respiratory pathogens nucleic acid six	2023/11/20 10:15:00									Negative		Negative		Negative		positive	↑	Negative		Negative
female	Throat swab	11year9month	pneumoniapneumonia	Respiratory pathogens nucleic acid six	2023/11/20 10:44:00									positive	↑	positive	↑	Negative		Negative		Negative		positive	↑
female	Throat swab	3year9month	Acute upper respiratory tract infection	Respiratory pathogens nucleic acid six	2023/11/20 10:49:00								62050220200212202X	Negative		Negative		Negative		Negative		Negative		Negative
male	sputum	5year8month	Acute bronchitis	Respiratory bacterial nucleic acid six	2023/11/20 11:05:00																					Negative(-)		Negative(-)		Negative(-)		positive(+）	↑	Negative(-)		positive(+）	↑
male	Throat swab	5year8month	Acute bronchitis	Respiratory pathogens nucleic acid six	2023/11/20 11:05:00									positive	↑	Negative		Negative		Negative		Negative		Negative
female	Throat swab	23day16hour	congenitalpneumonia	Respiratory pathogens nucleic acid six	2023/11/20 11:13:00									Negative		Negative		Negative		Negative		Negative		Negative
female	sputum	23day16hour	pneumonia	Respiratory bacterial nucleic acid six	2023/11/20 11:13:00																					Negative(-)		Negative(-)		Negative(-)		Negative(-)		Negative(-)		Negative(-)
female	Throat swab	6day9hour	congenitalpneumonia	Respiratory pathogens nucleic acid six	2023/11/20 11:15:00									Negative		Negative		positive	↑	Negative		Negative		Negative
female	sputum	6day9hour	pneumonia	Respiratory bacterial nucleic acid six	2023/11/20 11:15:00																					Negative(-)		Negative(-)		Negative(-)		Negative(-)		Negative(-)		Negative(-)
male	Throat swab	9year	acute	Respiratory pathogens nucleic acid six	2023/11/20 11:23:00									positive	↑	Negative		Negative		Negative		Negative		Negative
male	Throat swab	1month	bronchuspneumonia	Respiratory pathogens nucleic acid six	2023/11/20 12:39:00									Negative		Negative		positive	↑	Negative		Negative		Negative
female	sputum	8year	Lobarpneumonia	Respiratory bacterial nucleic acid six	2023/11/20 12:44:00																					Negative(-)		Negative(-)		Negative(-)		positive(+）	↑	Negative(-)		positive(+）	↑
female	Throat swab	8year	Lobarpneumonia	Respiratory pathogens nucleic acid six	2023/11/20 12:44:00									Negative		Negative		Negative		Negative		Negative		positive	↑
female	Throat swab	11year2month	pneumonia	Respiratory pathogens nucleic acid six	2023/11/20 13:22:00									Negative		Negative		Negative		Negative(-)		Negative		positive	↑
male	Throat swab	1year5month	Asthmatic bronchuspneumonia	Respiratory pathogens nucleic acid six	2023/11/20 14:08:00									Negative		Negative		positive	↑	Negative		Negative		Negative
male	sputum	13year	Acute bronchitis	Respiratory bacterial nucleic acid six	2023/11/20 14:11:00																					Negative(-)		Negative(-)		Negative(-)		positive(+）	↑	Negative(-)		positive(+）	↑
male	Throat swab	13year	Acute bronchitis	Respiratory pathogens nucleic acid six	2023/11/20 14:11:00									positive	↑	Negative		Negative		Negative		Negative		Negative
female	Throat swab	13year	bronchusasthma(acuteStage of attack)	Respiratory pathogens nucleic acid six	2023/11/20 14:25:00									Negative		Negative		Negative		Negative		positive	↑	Negative
male	Throat swab	5year8month	Acute upper respiratory tract infection	Respiratory pathogens nucleic acid six	2023/11/20 14:35:00									Negative		Negative		Negative		Negative		positive	↑	Negative
male	Throat swab	6month20day	Acute bronchitis	Respiratory pathogens nucleic acid six	2023/11/20 14:43:00									Negative		Negative		Negative		Negative		Negative		Negative
female	Throat swab	8year11month	bronchuspneumonia	Respiratory pathogens nucleic acid six	2023/11/20 15:36:00									Negative		Negative		Negative		Negative		Negative		positive	↑
male	sputum	3year9month	Acute bronchitis	Respiratory bacterial nucleic acid six	2023/11/20 16:16:00																					Negative(-)		Negative(-)		Negative(-)		positive(+）	↑	Negative(-)		positive(+）	↑
male	Throat swab	3year9month	Acute bronchitis	Respiratory pathogens nucleic acid six	2023/11/20 16:16:00									Negative		Negative		positive	↑	Negative		Negative		Negative
female	Throat swab	2year9month	pneumonia	Respiratory pathogens nucleic acid six	2023/11/20 16:40:00									Negative		Negative		Negative		Negative		Negative		positive	↑
male	sputum	6year10month	Lobarpneumonia	Respiratory bacterial nucleic acid six	2023/11/20 16:52:00																					Negative(-)		Negative(-)		Negative(-)		positive(+）	↑	Negative(-)		positive(+）	↑
male	Throat swab	6year10month	Lobarpneumonia	Respiratory pathogens nucleic acid six	2023/11/20 16:52:00									Negative		Negative		Negative		Negative		positive	↑	positive	↑
male	sputum	4year2month	fever	Respiratory bacterial nucleic acid six	2023/11/20 16:55:00																					Negative(-)		Negative(-)		Negative(-)		positive(+）	↑	Negative(-)		positive(+）	↑
male	Throat swab	4year2month	fever	Respiratory pathogens nucleic acid six	2023/11/20 16:55:00									Negative		Negative		Negative		Negative		Negative		Negative
male	Throat swab	4year7month	bronchus	Respiratory pathogens nucleic acid six	2023/11/20 17:37:00								620503201903245715	Negative		Negative		Negative		Negative		positive	↑	Negative
female	sputum	9year	pneumonia	Respiratory bacterial nucleic acid six	2023/11/20 17:53:00																					Negative(-)		Negative(-)		Negative(-)		Negative(-)		Negative(-)		positive(+）	↑
female	Throat swab	9year	pneumonia	Respiratory pathogens nucleic acid six	2023/11/20 17:53:00									Negative		Negative		Negative		positive(+）	↑	Negative		Negative
female	sputum	5year11month	Acute bronchitis	Respiratory bacterial nucleic acid six	2023/11/20 18:12:00																					Negative(-)		Negative(-)		Negative(-)		positive(+）	↑	Negative(-)		positive(+）	↑
female	Throat swab	5year11month	Acute bronchitis	Respiratory pathogens nucleic acid six	2023/11/20 18:12:00									positive	↑	Negative		Negative		Negative		Negative		Negative
male	Throat swab	2month1day	Acute bronchitis	Respiratory pathogens nucleic acid six	2023/11/20 18:16:00									Negative		Negative		Negative		Negative		Negative		Negative
male	Throat swab	11month28day	Acute bronchitis	Respiratory pathogens nucleic acid six	2023/11/20 18:29:00									Negative		Negative		positive	↑	Negative		Negative		positive	↑
male	Throat swab	2year4month	Asthmatic bronchuspneumonia	Respiratory pathogens nucleic acid six	2023/11/20 19:41:00									Negative		Negative		positive	↑	Negative		Negative		Negative
male	Throat swab	4year10month	Acute upper respiratory tract infection	Respiratory pathogens nucleic acid six	2023/11/20 19:51:00									positive	↑	Negative		Negative		Negative		positive	↑	Negative
male	Throat swab	3year9month	Acute upper respiratory tract infection	Respiratory pathogens nucleic acid six	2023/11/20 2:14:00								620522202002150018	Negative		Negative		positive	↑	Negative		Negative		Negative
male	sputum	1year6month	pneumonia	Respiratory bacterial nucleic acid six	2023/11/20 2:22:00																					Negative(-)		Negative(-)		Negative(-)		positive(+）	↑	Negative(-)		positive(+）	↑
male	Throat swab	1year6month	pneumonia	Respiratory pathogens nucleic acid six	2023/11/20 2:22:00									Negative		Negative		positive	↑	Negative		Negative		Negative
female	Throat swab	10month10day	acuteAsthmatic bronchus	Respiratory pathogens nucleic acid six	2023/11/20 20:07:00									Negative		Negative		positive	↑	Negative		Negative		Negative
female	sputum	10month10day	pneumonia	Respiratory bacterial nucleic acid six	2023/11/20 20:07:00																					Negative(-)		Negative(-)		Negative(-)		positive(+）	↑	Negative(-)		positive(+）	↑
female	sputum	6year	pneumonia	Respiratory bacterial nucleic acid six	2023/11/20 20:33:00																					Negative(-)		positive(+）	↑	Negative(-)		Negative(-)		Negative(-)		positive(+）	↑
female	Throat swab	6year	pneumonia	Respiratory pathogens nucleic acid six	2023/11/20 20:33:00									positive	↑	Negative		Negative		Negative		Negative		Negative
male	Throat swab	3year	pneumonia	Respiratory pathogens nucleic acid six	2023/11/20 20:46:00									Negative		Negative		Negative		positive	↑	Negative		Negative
female	Throat swab	8year3month	pneumoniapneumonia	Respiratory pathogens nucleic acid six	2023/11/20 22:44:00									Negative		Negative		Negative		Negative		Negative		positive	↑
female	Throat swab	4year7month	Acute upper respiratory tract infection	Respiratory pathogens nucleic acid six	2023/11/20 23:45:00									positive	↑	Negative		Negative		positive	↑	Negative		Negative
female	sputum	7year4month	Lobarpneumonia	Respiratory bacterial nucleic acid six	2023/11/20 23:47:00																					Negative(-)		Negative(-)		Negative(-)		positive(+）	↑	Negative(-)		Negative(-)
female	Throat swab	7year4month	Lobarpneumonia	Respiratory pathogens nucleic acid six	2023/11/20 23:47:00									Negative		Negative		Negative		Negative		Negative		positive	↑
male	sputum	6year5month	dyspnea	Respiratory bacterial nucleic acid six	2023/11/20 23:54:00																					Negative(-)		Negative(-)		Negative(-)		positive(+）	↑	Negative(-)		positive(+）	↑
male	Throat swab	6year5month	dyspnea	Respiratory pathogens nucleic acid six	2023/11/20 23:54:00									Negative		Negative		Negative		positive	↑	Negative		Negative
male	sputum	7year6month	Acute bronchitis	Respiratory bacterial nucleic acid six	2023/11/20 3:11:00																					Negative(-)		Negative(-)		Negative(-)		positive(+）	↑	Negative(-)		positive(+）	↑
male	Throat swab	7year6month	Acute bronchitis	Respiratory pathogens nucleic acid six	2023/11/20 3:11:00									positive	↑	Negative		Negative		positive	↑	Negative		Negative
male	Throat swab	7year3month	Acute upper respiratory tract infection	Respiratory pathogens nucleic acid six	2023/11/20 4:40:00								62050320160724091X	positive	↑	Negative		Negative		positive	↑	Negative		Negative
male	Throat swab	13year	Acute bronchitis	Respiratory pathogens nucleic acid six	2023/11/20 4:50:00									Negative		Negative		Negative		positive	↑	Negative		positive(+)	↑
female	Throat swab	5year9month	Acute bronchitis	Respiratory pathogens nucleic acid six	2023/11/20 6:49:00								620502201801212326	Negative		Negative		Negative		Negative		Negative		positive	↑
male	Throat swab	6year3month	Acute bronchitis	Respiratory pathogens nucleic acid six	2023/11/20 9:30:00								620521201708176710	positive	↑	Negative		Negative		Negative		Negative		positive	↑
female	Throat swab	9year9month	Acute bronchitis	Respiratory pathogens nucleic acid six	2023/11/20 9:31:00								620502201401252046	positive	↑	Negative		Negative		Negative		Negative		positive	↑
female	Throat swab	7month1day	Asthmatic bronchuspneumonia	Respiratory pathogens nucleic acid six	2023/11/21 0:46:00									Negative		Negative		Negative		Negative		Negative		Negative
male	Throat swab	6year	Acute bronchitis	Respiratory pathogens nucleic acid six	2023/11/21 1:42:00								620502201711163313	positive	↑	Negative		Negative		positive	↑	Negative		positive	↑
male	Throat swab	4year7month	Acute bronchitis	Respiratory pathogens nucleic acid six	2023/11/21 10:12:00								62050220190402001X	Negative		Negative		positive	↑	Negative		Negative		Negative
male	sputum	6year8month	pneumonia	Respiratory bacterial nucleic acid six	2023/11/21 10:22:00																					Negative(-)		Negative(-)		Negative(-)		positive(+）	↑	Negative(-)		positive(+）	↑
male	Throat swab	6year8month	pneumonia	Respiratory pathogens nucleic acid six	2023/11/21 10:22:00									Negative		Negative		positive	↑	positive	↑	Negative		positive	↑
male	Throat swab	9year9month	fever	Respiratory pathogens nucleic acid six	2023/11/21 10:41:00									Negative		Negative		Negative		Negative		Negative		positive	↑
female	Throat swab	1month6day	Acute bronchitis	Respiratory pathogens nucleic acid six	2023/11/21 10:50:00									Negative		Negative		positive	↑	Negative		Negative		Negative
male	Throat swab	2year	bronchus	Respiratory pathogens nucleic acid six	2023/11/21 11:11:00									positive(+）	↑	Negative		Negative		Negative		Negative		Negative
female	Throat swab	9year6month	Acute bronchitis	Respiratory pathogens nucleic acid six	2023/11/21 11:34:00									Negative(-)		Negative(-)		positive(+）	↑	Negative(-)		Negative(-)		positive(+)	↑
female	Throat swab	5year11month	Acute bronchitis	Respiratory pathogens nucleic acid six	2023/11/21 11:49:00								620521201712092026	Negative		Negative		Negative		Negative		Negative		Negative
female	Throat swab	5year	pneumonia	Respiratory pathogens nucleic acid six	2023/11/21 11:58:00									positive	↑	Negative		Negative		Negative		Negative		Negative
male	Throat swab	8year7month	Acute bronchitis	Respiratory pathogens nucleic acid six	2023/11/21 12:25:00								62050320150412801X	Negative		positive	↑	Negative		Negative		Negative		Negative
female	Throat swab	8year	pneumonia	Respiratory pathogens nucleic acid six	2023/11/21 12:25:00									Negative		Negative		Negative		Negative		Negative		positive	↑
female	sputum	1year	Acute bronchitis	Respiratory bacterial nucleic acid six	2023/11/21 13:00:00																					Negative(-)		Negative(-)		Negative(-)		Negative(-)		Negative(-)		positive(+）	↑
female	Throat swab	1year	Acute bronchitis	Respiratory pathogens nucleic acid six	2023/11/21 13:00:00									positive	↑	Negative		Negative		Negative		Negative		Negative
female	sputum	11year1month	Acute bronchitis	Respiratory bacterial nucleic acid six	2023/11/21 13:08:00																					Negative(-)		Negative(-)		Negative(-)		Negative(-)		Negative(-)		positive(+）	↑
female	Throat swab	11year1month	Acute bronchitis	Respiratory pathogens nucleic acid six	2023/11/21 13:08:00									Negative		Negative		Negative		Negative		Negative		positive	↑
male	Throat swab	1year11month	pneumonia	Respiratory pathogens nucleic acid six	2023/11/21 13:17:00									Negative		Negative		Negative		Negative		Negative		positive	↑
female	Throat swab	6year9month	Acute bronchitis	Respiratory pathogens nucleic acid six	2023/11/21 13:43:00									Negative		Negative		Negative		positive	↑	Negative		Negative
male	Throat swab	3day3hour	newbornfever	Respiratory pathogens nucleic acid six	2023/11/21 13:44:00									Negative		Negative		Negative		Negative		Negative		Negative
female	Throat swab	7year10month	Acute bronchitis	Respiratory pathogens nucleic acid six	2023/11/21 13:55:00									Negative		Negative		Negative		Negative		Negative		positive	↑
male	Throat swab	8year10month	Acute bronchitis	Respiratory pathogens nucleic acid six	2023/11/21 14:03:00									Negative		Negative		Negative		positive	↑	Negative		positive	↑
male	Throat swab	2year10month	fever	Respiratory pathogens nucleic acid six	2023/11/21 14:12:00									Negative		Negative		Negative		Negative		Negative		Negative
male	Throat swab	27day16hour	newbornpneumonia	Respiratory pathogens nucleic acid six	2023/11/21 14:33:00									Negative		Negative		positive	↑	Negative		Negative		Negative
male	sputum	27day16hour	newbornpneumonia	Respiratory bacterial nucleic acid six	2023/11/21 14:37:00																					Negative(-)		Negative(-)		Negative(-)		Negative(-)		Negative(-)		Negative(-)
female	sputum	1year3month	bronchuspneumonia	Respiratory bacterial nucleic acid six	2023/11/21 14:43:00																					Negative(-)		Negative(-)		Negative(-)		positive(+）	↑	Negative(-)		positive(+）	↑
female	Throat swab	1year3month	bronchuspneumonia	Respiratory pathogens nucleic acid six	2023/11/21 14:43:00									Negative		Negative		Negative		Negative		Negative		Negative
female	sputum	7year6month	fever	Respiratory bacterial nucleic acid six	2023/11/21 14:50:00																					Negative(-)		Negative(-)		Negative(-)		positive(+）	↑	Negative(-)		positive(+）	↑
female	Throat swab	7year6month	fever	Respiratory pathogens nucleic acid six	2023/11/21 14:50:00									positive	↑	Negative		Negative		Negative		Negative		Negative
male	Throat swab	6month27day	Asthmatic bronchuspneumonia	Respiratory pathogens nucleic acid six	2023/11/21 15:55:00									Negative		Negative		positive	↑	Negative		Negative		Negative
male	Throat swab	7year9month	Acute bronchitis	Respiratory pathogens nucleic acid six	2023/11/21 16:11:00									Negative		Negative		Negative		positive	↑	positive	↑	Negative
male	Throat swab	2year2month	bronchus	Respiratory pathogens nucleic acid six	2023/11/21 16:16:00									positive	↑	Negative		positive	↑	Negative		Negative		Negative
female	sputum	1year1month	pneumonia	Respiratory bacterial nucleic acid six	2023/11/21 16:37:00																					Negative(-)		Negative(-)		Negative(-)		Negative(-)		Negative(-)		positive(+）	↑
female	Throat swab	1year1month	pneumonia	Respiratory pathogens nucleic acid six	2023/11/21 16:37:00									positive	↑	Negative		Negative		Negative		Negative		positive	↑
female	Throat swab	3year11month	bronchus	Respiratory pathogens nucleic acid six	2023/11/21 17:14:00									Negative		Negative		Negative		positive	↑	Negative		positive	↑
female	Throat swab	4year	Acute bronchitis	Respiratory pathogens nucleic acid six	2023/11/21 17:19:00									Negative		Negative		Negative		Negative		Negative(-)		positive	↑
male	Throat swab	3year3month	Acute bronchitis	Respiratory pathogens nucleic acid six	2023/11/21 17:26:00								620502202007312017	positive	↑	Negative		Negative		Negative		Negative		Negative
female	Throat swab	10year2month	Acute bronchitis	Respiratory pathogens nucleic acid six	2023/11/21 17:49:00									Negative		Negative		Negative		Negative		Negative		positive	↑
male	Throat swab	4year7month	Acute bronchitis	Respiratory pathogens nucleic acid six	2023/11/21 18:11:00									positive	↑	Negative		Negative		Negative		Negative		Negative
female	Throat swab	4year1month	Acute bronchitis	Respiratory pathogens nucleic acid six	2023/11/21 18:35:00								620502201910180423	Negative		Negative		Negative		positive	↑	Negative		positive(+)	↑
male	sputum	9year3month	pneumonia	Respiratory bacterial nucleic acid six	2023/11/21 19:59:00																					Negative(-)		Negative(-)		Negative(-)		Negative(-)		Negative(-)		positive(+）	↑
male	Throat swab	9year3month	pneumonia	Respiratory pathogens nucleic acid six	2023/11/21 19:59:00									Negative		Negative		Negative		Negative		Negative		Negative
male	Throat swab	7year1month	Unexplained convulsion	Respiratory pathogens nucleic acid six	2023/11/21 20:48:00									positive(+）	↑	Negative		Negative		Negative		Negative		Negative
female	Throat swab	2year8month	Febrile convulsion	Respiratory pathogens nucleic acid six	2023/11/21 23:28:00									Negative(-)		Negative(-)		Negative(-)		Negative(-)		Negative(-)		Negative(-)
male	Throat swab	2year2month	Febrile convulsion	Respiratory pathogens nucleic acid six	2023/11/21 23:28:00									positive	↑	Negative		Negative		positive	↑	Negative		Negative
female	sputum	1year8month	Acute bronchitis	Respiratory bacterial nucleic acid six	2023/11/21 4:08:00																					Negative(-)		Negative(-)		Negative(-)		positive(+）	↑	Negative(-)		Negative(-)
female	Throat swab	1year8month	Acute bronchitis	Respiratory pathogens nucleic acid six	2023/11/21 4:08:00									Negative		Negative		Negative		Negative		Negative		Negative
male	Throat swab	4year7month	Febrile convulsion	Respiratory pathogens nucleic acid six	2023/11/21 4:55:00									positive	↑	Negative		positive	↑	Negative		positive	↑	Negative
female	sputum	1year1month	Acute upper respiratory tract infection	Respiratory bacterial nucleic acid six	2023/11/21 4:57:00																					Negative(-)		positive(+）	↑	Negative(-)		Negative(-)		Negative(-)		Negative(-)
female	Throat swab	1year1month	Acute upper respiratory tract infection	Respiratory pathogens nucleic acid six	2023/11/21 4:57:00									positive(+）	↑	Negative		Negative		Negative		Negative		Negative
female	Throat swab	8year11month	Acute bronchitis	Respiratory pathogens nucleic acid six	2023/11/21 8:17:00								620502201412110027	positive	↑	Negative		Negative		positive	↑	Negative		Negative
female	Throat swab	5year	bronchus	Respiratory pathogens nucleic acid six	2023/11/21 8:36:00								621225201810251625	Negative		Negative		Negative		Negative		Negative(-)		positive	↑
male	Throat swab	12year	fever	Respiratory pathogens nucleic acid six	2023/11/21 8:46:00								620502201107261312	positive	↑	Negative		positive	↑	Negative		Negative		Negative
male	Throat swab	9year10month	Acute bronchitis	Respiratory pathogens nucleic acid six	2023/11/21 8:55:00									Negative		Negative		Negative		Negative		Negative		Negative
male	sputum	10year8month	fever	Respiratory bacterial nucleic acid six	2023/11/21 9:31:00																					Negative(-)		Negative(-)		Negative(-)		positive(+）	↑	Negative(-)		positive(+）	↑
male	Throat swab	10year8month	fever	Respiratory pathogens nucleic acid six	2023/11/21 9:31:00									Negative		Negative		Negative		Negative		Negative		positive	↑
female	Throat swab	10year1month	Acute bronchitis	Respiratory pathogens nucleic acid six	2023/11/22 1:21:00									Negative		Negative		Negative		Negative		Negative		Negative
male	Throat swab	10year5month	Acute bronchitis	Respiratory pathogens nucleic acid six	2023/11/22 10:06:00									Negative(-)		Negative(-)		Negative(-)		Negative(-)		Negative(-)		positive(+)	↑
female	Throat swab	7year2month	Acute bronchitis	Respiratory pathogens nucleic acid six	2023/11/22 10:16:00								620502201608240720	positive	↑	Negative		Negative		Negative		Negative		Negative
female	Throat swab	5month22day	pneumonia	Respiratory pathogens nucleic acid six	2023/11/22 10:22:00									positive(+）	↑	Negative(-)		Negative(-)		Negative(-)		Negative(-)		Negative(-)
male	Throat swab	2year6month	pneumonia	Respiratory pathogens nucleic acid six	2023/11/22 10:27:00									positive(+）	↑	Negative(-)		positive(+）	↑	Negative		positive(+）	↑	Negative(-)
male	Throat swab	8year5month	pneumonia	Respiratory pathogens nucleic acid six	2023/11/22 11:26:00									Negative(-)		Negative(-)		positive(+）	↑	Negative(-)		positive(+）	↑	Negative(-)
female	Throat swab	4month15day	pneumonia	Respiratory pathogens nucleic acid six	2023/11/22 11:35:00									Negative(-)		positive(+）	↑	Negative(-)		Negative(-)		Negative(-)		Negative(-)
male	Throat swab	10month9day	pneumonia	Respiratory pathogens nucleic acid six	2023/11/22 11:43:00									Negative(-)		Negative(-)		Negative(-)		Negative(-)		Negative(-)		positive(+)	↑
female	Throat swab	5year10month	pneumonia	Respiratory pathogens nucleic acid six	2023/11/22 11:59:00									Negative(-)		Negative(-)		Negative(-)		Negative(-)		Negative(-)		positive(+)	↑
female	Throat swab	3year9month	pneumonia	Respiratory pathogens nucleic acid six	2023/11/22 12:23:00									Negative(-)		Negative(-)		Negative(-)		Negative(-)		Negative(-)		Negative(-)
female	Throat swab	2year2month	Acute upper respiratory tract infection	Respiratory pathogens nucleic acid six	2023/11/22 13:23:00									Negative(-)		Negative(-)		Negative(-)		positive(+）	↑	Negative(-)		Negative(-)
male	Throat swab	4year10month	acutetonsillitis	Respiratory pathogens nucleic acid six	2023/11/22 13:44:00									Negative(-)		positive(+）	↑	Negative(-)		Negative(-)		Negative(-)		Negative(-)
female	Throat swab	6year8month	Acute bronchitis	Respiratory pathogens nucleic acid six	2023/11/22 13:47:00									Negative(-)		Negative(-)		Negative(-)		Negative(-)		Negative(-)		Negative(-)
male	sputum	3year	pneumonia	Respiratory bacterial nucleic acid six	2023/11/22 14:14:00																					Negative(-)		Negative(-)		Negative(-)		positive(+）	↑	Negative(-)		positive(+）	↑
male	Throat swab	3year	pneumonia	Respiratory pathogens nucleic acid six	2023/11/22 14:14:00									Negative		Negative(-)		Negative(-)		Negative		Negative(-)		Negative(-)
male	Throat swab	2month20day	pneumonia	Respiratory pathogens nucleic acid six	2023/11/22 14:58:00									Negative(-)		Negative(-)		positive(+）	↑	Negative(-)		Negative(-)		Negative(-)
male	Throat swab	12year	Acute bronchitis	Respiratory pathogens nucleic acid six	2023/11/22 15:32:00								620502201111040715	Negative(-)		Negative(-)		Negative(-)		Negative(-)		Negative(-)		Negative(-)
female	sputum	2year5month	Acute laryngitis	Respiratory bacterial nucleic acid six	2023/11/22 15:44:00																					Negative(-)		Negative(-)		positive(+）	↑	Negative(-)		Negative(-)		positive(+）	↑
female	Throat swab	2year5month	Acute laryngitis	Respiratory pathogens nucleic acid six	2023/11/22 15:44:00									positive	↑	Negative(-)		Negative(-)		Negative(-)		Negative(-)		Negative(-)
male	Throat swab	2year11month	Acute bronchitis	Respiratory pathogens nucleic acid six	2023/11/22 15:57:00									Negative(-)		Negative(-)		Negative(-)		Negative(-)		Negative(-)		positive(+)	↑
female	Throat swab	9year8month	Acute bronchitis	Respiratory pathogens nucleic acid six	2023/11/22 16:25:00									Negative(-)		Negative(-)		Negative(-)		Negative(-)		Negative(-)		positive(+)	↑
male	sputum	6month15day	pneumonia	Respiratory bacterial nucleic acid six	2023/11/22 16:25:00																					Negative(-)		Negative(-)		Negative(-)		positive(+）	↑	Negative(-)		positive(+）	↑
male	Throat swab	6month15day	pneumonia	Respiratory pathogens nucleic acid six	2023/11/22 16:25:00									Negative(-)		Negative(-)		Negative(-)		Negative(-)		Negative(-)		Negative(-)
female	Throat swab	6year2month	Acute bronchitis	Respiratory pathogens nucleic acid six	2023/11/22 16:42:00								620502201708252323	Negative(-)		Negative(-)		Negative(-)		Negative(-)		Negative(-)		Negative(-)
female	Throat swab	11year2month	pneumonia	Respiratory pathogens nucleic acid six	2023/11/22 17:06:00									Negative(-)		Negative(-)		Negative(-)		Negative(-)		Negative(-)		Negative(-)
male	Throat swab	4year7month	bronchus	Respiratory pathogens nucleic acid six	2023/11/22 17:14:00									Negative(-)		Negative(-)		Negative(-)		Negative(-)		Negative(-)		Negative(-)
male	Throat swab	4year8month	bronchuspneumonia	Respiratory pathogens nucleic acid six	2023/11/22 17:14:00									positive	↑	Negative		Negative		Negative		Negative		Negative
female	Throat swab	10month9day	pneumonia	Respiratory pathogens nucleic acid six	2023/11/22 17:22:00									Negative(-)		Negative(-)		Negative(-)		Negative(-)		Negative(-)		Negative(-)
female	Throat swab	9year1month	Acute bronchitis	Respiratory pathogens nucleic acid six	2023/11/22 17:25:00									Negative		Negative(-)		Negative(-)		Negative		Negative(-)		Negative(-)
male	Throat swab	4month2day	bronchus	Respiratory pathogens nucleic acid six	2023/11/22 17:41:00									Negative		Negative(-)		Negative(-)		positive	↑	Negative(-)		Negative(-)
female	Throat swab	1year	Acute laryngotracheitis	Respiratory pathogens nucleic acid six	2023/11/22 17:43:00									Negative(-)		Negative(-)		positive(+）	↑	Negative(-)		Negative(-)		Negative(-)
female	Throat swab	5year8month	Asthmatic bronchuspneumonia	Respiratory pathogens nucleic acid six	2023/11/22 18:21:00									Negative(-)		Negative(-)		positive(+）	↑	positive(+）	↑	Negative(-)		Negative(-)
male	Throat swab	2year11month	pneumonia	Respiratory pathogens nucleic acid six	2023/11/22 18:54:00									Negative(-)		Negative(-)		Negative(-)		Negative(-)		Negative(-)		Negative(-)
male	Throat swab	4year10month	Acute bronchitis	Respiratory pathogens nucleic acid six	2023/11/22 19:16:00								620523201901100390	positive	↑	Negative		Negative		Negative		positive	↑	positive	↑
female	Throat swab	8month5day	pneumonia	Respiratory pathogens nucleic acid six	2023/11/22 19:50:00									Negative(-)		Negative(-)		positive(+）	↑	Negative(-)		Negative(-)		Negative(-)
male	sputum	3year9month	Acute bronchitis	Respiratory bacterial nucleic acid six	2023/11/22 2:55:00																					Negative(-)		Negative(-)		Negative(-)		positive(+）	↑	Negative(-)		Negative(-)
male	Throat swab	3year9month	Acute bronchitis	Respiratory pathogens nucleic acid six	2023/11/22 2:55:00									Negative		Negative		Negative		positive	↑	Negative		Negative
female	Throat swab	4year4month	pneumonia	Respiratory pathogens nucleic acid six	2023/11/22 21:36:00									Negative		positive(+）	↑	Negative(-)		Negative		Negative(-)		Negative(-)
male	Throat swab	7year1month	Acute bronchitis	Respiratory pathogens nucleic acid six	2023/11/22 22:31:00									positive(+）	↑	Negative(-)		Negative(-)		positive(+）	↑	Negative(-)		Negative(-)
female	Throat swab	7year10month	fever	Respiratory pathogens nucleic acid six	2023/11/22 7:46:00								620502201601070028	Negative		positive	↑	Negative		Negative		Negative		Negative
female	sputum	1year	Herpetic angina	Respiratory bacterial nucleic acid six	2023/11/22 8:17:00																					Negative(-)		Negative(-)		Negative(-)		positive(+）	↑	Negative(-)		positive(+）	↑
female	Throat swab	1year	Herpetic angina	Respiratory pathogens nucleic acid six	2023/11/22 8:17:00									positive(+）	↑	Negative(-)		positive(+）	↑	Negative(-)		Negative(-)		Negative(-)
male	Throat swab	4year1month	fever	Respiratory pathogens nucleic acid six	2023/11/22 9:30:00								620502201909264312	positive	↑	Negative		Negative		Negative		Negative		Negative
male	sputum	7month23day	pneumonia	Respiratory bacterial nucleic acid six	2023/11/22 9:39:00																					Negative(-)		Negative(-)		Negative(-)		Negative(-)		Negative(-)		positive(+）	↑
male	Throat swab	7month23day	pneumonia	Respiratory pathogens nucleic acid six	2023/11/22 9:39:00									Negative(-)		Negative(-)		positive(+）	↑	Negative(-)		Negative(-)		Negative(-)
male	Throat swab	3year4month	acuteAsthmatic bronchus	Respiratory pathogens nucleic acid six	2023/11/22 9:44:00									positive(+）	↑	Negative(-)		Negative(-)		Negative(-)		Negative(-)		Negative(-)
female	Throat swab	2year10month	Acute bronchitis	Respiratory pathogens nucleic acid six	2023/11/22 9:59:00								620502202101042025	Negative		Negative		positive	↑	Negative		Negative		Negative
female	Throat swab	5month6day	pneumonia	Respiratory pathogens nucleic acid six	2023/11/23 1:41:00									Negative(-)		Negative(-)		positive(+）	↑	positive(+）	↑	Negative(-)		Negative(-)
male	Throat swab	1year1month	Acute laryngitis	Respiratory pathogens nucleic acid six	2023/11/23 1:47:00									Negative(-)		Negative(-)		positive(+）	↑	Negative(-)		Negative(-)		Negative(-)
male	Throat swab	5year	Acute bronchitis	Respiratory pathogens nucleic acid six	2023/11/23 10:24:00								620502201810242017	Negative		Negative		positive	↑	Negative		Negative		Negative
male	Throat swab	10year11month	Acute upper respiratory tract infection	Respiratory pathogens nucleic acid six	2023/11/23 10:41:00								620502201212117718	Negative		Negative		Negative		positive	↑	Negative		Negative
male	Throat swab	7year9month	bronchus	Respiratory pathogens nucleic acid six	2023/11/23 10:42:00									positive	↑	Negative		Negative		Negative		Negative		positive	↑
male	Throat swab	6year	pneumonia	Respiratory pathogens nucleic acid six	2023/11/23 10:45:00									Negative		Negative		Negative		Negative		Negative		positive	↑
male	Throat swab	9year3month	Acute bronchitis	Respiratory pathogens nucleic acid six	2023/11/23 11:16:00									positive	↑	Negative		Negative		Negative		Negative		positive	↑
male	Throat swab	1year6month	Acute bronchitis	Respiratory pathogens nucleic acid six	2023/11/23 12:20:00									Negative		Negative		positive	↑	Negative		Negative		Negative
male	Throat swab	11year3month	Acute bronchitis	Respiratory pathogens nucleic acid six	2023/11/23 12:30:00									Negative		positive	↑	Negative		positive	↑	Negative		Negative
female	Throat swab	6day20hour	newborn病理性黄疸	Respiratory pathogens nucleic acid six	2023/11/23 12:35:00									Negative		Negative		Negative		Negative		Negative		Negative
male	Throat swab	4year7month	acutetonsillitis	Respiratory pathogens nucleic acid six	2023/11/23 12:55:00									positive	↑	Negative		Negative		Negative		Negative		Negative
male	Throat swab	4month1day	pneumonia	Respiratory pathogens nucleic acid six	2023/11/23 13:14:00									Negative		Negative		Negative		Negative		Negative		Negative
male	Throat swab	2year7month	pneumonia	Respiratory pathogens nucleic acid six	2023/11/23 13:30:00									Negative		Negative		Negative		Negative		Negative		positive	↑
female	Throat swab	9year10month	Acute bronchitis	Respiratory pathogens nucleic acid six	2023/11/23 15:09:00								620502201401212028	Negative		Negative		Negative		positive	↑	Negative		positive	↑
female	Throat swab	5year2month	pneumonia	Respiratory pathogens nucleic acid six	2023/11/23 15:14:00									Negative		Negative		Negative		Negative		Negative		positive	↑
female	Throat swab	7year2month	Acute bronchitis	Respiratory pathogens nucleic acid six	2023/11/23 15:22:00								620502201609032042	positive	↑	Negative		positive	↑	Negative		Negative		Negative
male	Throat swab	3month3day	bronchuspneumonia	Respiratory pathogens nucleic acid six	2023/11/23 15:43:00									Negative		Negative		Negative		Negative		Negative		Negative
female	Throat swab	10year9month	Acute bronchitis	Respiratory pathogens nucleic acid six	2023/11/23 15:48:00									Negative		Negative		Negative		positive	↑	positive	↑	positive	↑
female	Throat swab	4year1month	fever	Respiratory pathogens nucleic acid six	2023/11/23 16:16:00								620502201910242022	positive	↑	Negative		Negative		positive	↑	Negative		Negative
male	Throat swab	6month9day	pneumonia	Respiratory pathogens nucleic acid six	2023/11/23 16:16:00									positive	↑	Negative		Negative		Negative		Negative		Negative
male	Throat swab	13year	bronchus	Respiratory pathogens nucleic acid six	2023/11/23 16:36:00									Negative		positive	↑	Negative		Negative		Negative		Negative
female	Throat swab	10year	pneumonia	Respiratory pathogens nucleic acid six	2023/11/23 16:38:00									Negative		Negative		Negative		Negative		Negative		positive	↑
male	Throat swab	6year4month	Febrile convulsion	Respiratory pathogens nucleic acid six	2023/11/23 16:43:00									positive	↑	Negative		Negative		Negative		Negative		Negative
male	sputum	19day5hour	congenitalpneumonia	Respiratory bacterial nucleic acid six	2023/11/23 17:26:00																					Negative(-)		Negative(-)		Negative(-)		Negative(-)		Negative(-)		Negative(-)
male	Throat swab	19day5hour	congenitalpneumonia	Respiratory pathogens nucleic acid six	2023/11/23 17:26:00									Negative		Negative		positive	↑	Negative		Negative		Negative
male	Throat swab	3year4month	pneumonia	Respiratory pathogens nucleic acid six	2023/11/23 17:36:00									Negative		Negative		Negative		Negative		Negative		Negative
male	Throat swab	3year	pneumonia	Respiratory pathogens nucleic acid six	2023/11/23 17:38:00									Negative		Negative		Negative		Negative		Negative		Negative
female	Throat swab	1month27day	bronchuspneumonia	Respiratory pathogens nucleic acid six	2023/11/23 17:51:00									Negative		Negative		positive	↑	Negative		Negative		Negative
male	Throat swab	2year2month	acuteAsthmatic bronchus	Respiratory pathogens nucleic acid six	2023/11/23 17:57:00									Negative		Negative		Negative		positive	↑	Negative		Negative
female	Throat swab	4year	fever	Respiratory pathogens nucleic acid six	2023/11/23 18:04:00									positive	↑	Negative		Negative		positive	↑	Negative		Negative
male	Throat swab	11year6month	pneumoniapneumonia	Respiratory pathogens nucleic acid six	2023/11/23 18:10:00									positive	↑	Negative		Negative		Negative		Negative		positive	↑
female	Throat swab	1year10month	Acute bronchitis	Respiratory pathogens nucleic acid six	2023/11/23 18:22:00								620503202201108024	Negative		Negative		positive	↑	Negative		Negative		Negative
male	Throat swab	6year10month	bronchus	Respiratory pathogens nucleic acid six	2023/11/23 18:27:00									Negative		Negative		Negative		Negative		Negative		positive	↑
male	Throat swab	6year11month	Febrile convulsion	Respiratory pathogens nucleic acid six	2023/11/23 18:30:00									Negative		Negative		Negative		positive	↑	Negative		Negative
female	Throat swab	4year6month	Acute bronchitis	Respiratory pathogens nucleic acid six	2023/11/23 18:50:00									positive	↑	positive	↑	Negative		Negative		Negative		Negative
male	Throat swab	4year2month	Acute bronchitis	Respiratory pathogens nucleic acid six	2023/11/23 19:02:00									positive	↑	Negative		Negative		Negative		positive	↑	Negative
female	Throat swab	3year7month	Acute bronchitis	Respiratory pathogens nucleic acid six	2023/11/23 22:38:00									Negative		Negative		Negative		Negative		Negative		Negative
male	Throat swab	4year	Unexplained convulsion	Respiratory pathogens nucleic acid six	2023/11/23 23:28:00									positive	↑	Negative		Negative		Negative		Negative		Negative
female	Throat swab	5year3month	Acute upper respiratory tract infection	Respiratory pathogens nucleic acid six	2023/11/23 6:57:00									positive	↑	Negative(-)		Negative(-)		positive	↑	Negative(-)		Negative(-)
male	Throat swab	6year	Acute upper respiratory tract infection	Respiratory pathogens nucleic acid six	2023/11/23 8:50:00								620502201711044613	positive	↑	positive	↑	Negative		positive(+）	↑	Negative		Negative
male	Throat swab	6year11month	bronchus	Respiratory pathogens nucleic acid six	2023/11/23 9:19:00									positive	↑	Negative		Negative		positive	↑	Negative		positive	↑
male	Throat swab	4year7month	Acute bronchitis	Respiratory pathogens nucleic acid six	2023/11/24 10:35:00								620502201904131318	positive(+）	↑	Negative(-)		Negative(-)		Negative(-)		Negative(-)		Negative(-)
female	Throat swab	2month2day	pneumonia	Respiratory pathogens nucleic acid six	2023/11/24 11:53:00									positive(+）	↑	Negative(-)		Negative(-)		Negative(-)		Negative(-)		Negative(-)
male	Throat swab	1month11day	bronchuspneumonia	Respiratory pathogens nucleic acid six	2023/11/24 11:56:00									Negative(-)		Negative(-)		positive(+）	↑	Negative(-)		Negative(-)		Negative(-)
male	Throat swab	22day12hour	fever	Respiratory pathogens nucleic acid six	2023/11/24 12:15:00									Negative(-)		Negative(-)		Negative(-)		Negative(-)		Negative(-)		Negative(-)
female	Throat swab	1year	pneumonia	Respiratory pathogens nucleic acid six	2023/11/24 12:26:00									Negative(-)		Negative(-)		positive(+）	↑	Negative(-)		Negative(-)		Negative(-)
female	Throat swab	3year9month	Acute bronchitis	Respiratory pathogens nucleic acid six	2023/11/24 12:27:00									Negative(-)		Negative(-)		positive(+）	↑	Negative(-)		Negative(-)		Negative(-)
female	Throat swab	4year5month	Unexplained convulsion	Respiratory pathogens nucleic acid six	2023/11/24 13:18:00									positive(+）	↑	Negative(-)		Negative(-)		Negative(-)		Negative(-)		Negative(-)
male	Throat swab	3year7month	pneumonia	Respiratory pathogens nucleic acid six	2023/11/24 13:29:00									Negative(-)		Negative(-)		Negative(-)		positive(+）	↑	Negative(-)		positive(+)	↑
male	sputum	22day15hour	newbornfever	Respiratory bacterial nucleic acid six	2023/11/24 13:33:00																					Negative(-)		positive(+）	↑	positive(+）	↑	Negative(-)		Negative(-)		positive(+）	↑
male	Throat swab	20day17hour	newbornfever	Respiratory pathogens nucleic acid six	2023/11/24 13:33:00									Negative(-)		Negative(-)		Negative(-)		Negative(-)		Negative(-)		Negative(-)
female	Throat swab	3year8month	Acute upper respiratory tract infection	Respiratory pathogens nucleic acid six	2023/11/24 14:16:00								620523202003150024	positive(+）	↑	Negative(-)		Negative(-)		Negative(-)		Negative(-)		Negative(-)
male	Throat swab	5year	pneumonia	Respiratory pathogens nucleic acid six	2023/11/24 14:22:00									Negative(-)		Negative(-)		Negative(-)		Negative(-)		Negative(-)		positive(+)	↑
male	Throat swab	7year11month	Febrile convulsion	Respiratory pathogens nucleic acid six	2023/11/24 14:23:00									Negative(-)		Negative(-)		Negative(-)		Negative(-)		Negative(-)		Negative(-)
male	Throat swab	7year	Acute upper respiratory tract infection	Respiratory pathogens nucleic acid six	2023/11/24 15:00:00								620602201610260312	Negative(-)		positive(+）	↑	Negative(-)		Negative(-)		Negative(-)		Negative(-)
female	Throat swab	3year	pneumonia	Respiratory pathogens nucleic acid six	2023/11/24 15:20:00									Negative(-)		Negative(-)		positive(+）	↑	Negative(-)		Negative(-)		Negative(-)
male	Throat swab	5month17day	pneumonia	Respiratory pathogens nucleic acid six	2023/11/24 15:42:00									positive(+）	↑	Negative(-)		Negative(-)		Negative(-)		Negative(-)		positive(+)	↑
male	Throat swab	12year	Acute bronchitis	Respiratory pathogens nucleic acid six	2023/11/24 16:07:00									Negative(-)		Negative(-)		positive(+）	↑	Negative(-)		Negative(-)		Negative(-)
male	Throat swab	4year4month	Acute bronchitis	Respiratory pathogens nucleic acid six	2023/11/24 16:21:00								620502201907192036	positive(+）	↑	Negative(-)		Negative(-)		Negative(-)		Negative(-)		Negative(-)
female	Throat swab	8year8month	Acute bronchitis	Respiratory pathogens nucleic acid six	2023/11/24 16:26:00									Negative(-)		Negative(-)		Negative(-)		Negative(-)		Negative(-)		positive(+)	↑
male	sputum	12year	Acute bronchitis	Respiratory bacterial nucleic acid six	2023/11/24 16:27:00																					Negative(-)		Negative(-)		Negative(-)		positive(+）	↑	Negative(-)		Negative(-)
male	Throat swab	7year5month	Acute bronchitis	Respiratory pathogens nucleic acid six	2023/11/24 16:28:00								620502201606142019	Negative(-)		positive(+）	↑	Negative(-)		Negative(-)		Negative(-)		Negative(-)
female	Throat swab	3year2month	Acute bronchitis	Respiratory pathogens nucleic acid six	2023/11/24 16:33:00									Negative(-)		Negative(-)		Negative(-)		Negative(-)		Negative(-)		positive(+)	↑
female	Throat swab	10year3month	Lobarpneumonia	Respiratory pathogens nucleic acid six	2023/11/24 17:00:00									Negative(-)		Negative(-)		Negative(-)		Negative(-)		Negative(-)		positive(+)	↑
male	Throat swab	3year3month	pneumonia	Respiratory pathogens nucleic acid six	2023/11/24 17:27:00									positive(+）	↑	Negative(-)		Negative(-)		Negative(-)		Negative(-)		Negative(-)
male	Throat swab	2year9month	pneumonia	Respiratory pathogens nucleic acid six	2023/11/24 17:38:00									Negative(-)		Negative(-)		Negative(-)		Negative(-)		Negative(-)		Negative(-)
male	Throat swab	8year5month	fever	Respiratory pathogens nucleic acid six	2023/11/24 18:01:00									Negative(-)		Negative(-)		Negative(-)		Negative(-)		Negative(-)		positive(+)	↑
male	Throat swab	2month16day	acuteAsthmatic bronchus	Respiratory pathogens nucleic acid six	2023/11/24 18:07:00									Negative(-)		Negative(-)		positive(+）	↑	Negative(-)		Negative(-)		Negative(-)
male	Throat swab	9month7day	Acute laryngitis	Respiratory pathogens nucleic acid six	2023/11/24 19:02:00									Negative(-)		Negative(-)		positive(+）	↑	Negative(-)		positive(+）	↑	positive(+)	↑
male	Throat swab	12year	Routine health checks for children	Respiratory pathogens nucleic acid six	2023/11/24 2:02:00									Negative		Negative		Negative		positive	↑	Negative		Negative
male	Throat swab	4year5month	Acute bronchitis	Respiratory pathogens nucleic acid six	2023/11/24 2:05:00									positive	↑	Negative		Negative		Negative		Negative		Negative
male	Throat swab	5year7month	Acute bronchitis	Respiratory pathogens nucleic acid six	2023/11/24 20:57:00								620502201803260014	positive(+）	↑	Negative(-)		Negative(-)		Negative(-)		Negative(-)		Negative(-)
male	sputum	11day1hour	congenitalpneumonia	Respiratory bacterial nucleic acid six	2023/11/24 21:10:00																					Negative(-)		Negative(-)		Negative(-)		Negative(-)		Negative(-)		Negative(-)
male	Throat swab	11day1hour	congenitalpneumonia	Respiratory pathogens nucleic acid six	2023/11/24 21:10:00									Negative(-)		Negative(-)		positive(+）	↑	Negative(-)		Negative(-)		Negative(-)
female	Throat swab	4year2month	pneumonia	Respiratory pathogens nucleic acid six	2023/11/24 21:20:00									Negative(-)		Negative(-)		positive(+）	↑	Negative(-)		Negative(-)		Negative(-)
male	Throat swab	1year10month	Acute upper respiratory tract infection	Respiratory pathogens nucleic acid six	2023/11/24 21:40:00								620503202201028016	Negative(-)		positive(+）	↑	Negative(-)		Negative(-)		Negative(-)		Negative(-)
male	Throat swab	2year	Acute bronchitis	Respiratory pathogens nucleic acid six	2023/11/24 21:43:00									positive(+）	↑	positive(+）	↑	Negative(-)		positive(+）	↑	Negative(-)		Negative(-)
female	Throat swab	7year6month	Acute bronchitis	Respiratory pathogens nucleic acid six	2023/11/24 21:53:00									Negative(-)		positive(+）	↑	Negative(-)		positive(+）	↑	Negative(-)		Negative(-)
female	Throat swab	7year8month	fever	Respiratory pathogens nucleic acid six	2023/11/24 22:32:00									Negative(-)		Negative(-)		Negative(-)		Negative(-)		Negative(-)		positive(+)	↑
male	Throat swab	4year11month	Febrile convulsion	Respiratory pathogens nucleic acid six	2023/11/24 22:50:00									positive(+）	↑	Negative(-)		Negative(-)		Negative(-)		Negative(-)		Negative(-)
female	Throat swab	10year5month	Acute bronchitis	Respiratory pathogens nucleic acid six	2023/11/24 22:51:00									Negative(-)		Negative(-)		Negative(-)		Negative(-)		Negative(-)		Negative(-)
female	Throat swab	6year8month	pneumonia	Respiratory pathogens nucleic acid six	2023/11/24 23:11:00									positive(+）	↑	Negative(-)		Negative(-)		Negative(-)		Negative(-)		Negative(-)
female	Throat swab	6year9month	Febrile convulsion	Respiratory pathogens nucleic acid six	2023/11/24 8:31:00									Negative(-)		Negative(-)		Negative(-)		positive(+）	↑	Negative(-)		Negative(-)
female	Throat swab	7year10month	bronchus	Respiratory pathogens nucleic acid six	2023/11/24 9:11:00								620522201601050022	Negative		Negative		Negative		Negative		Negative		Negative
male	Throat swab	6year11month	Acute bronchitis	Respiratory pathogens nucleic acid six	2023/11/24 9:27:00								620502201612080010	Negative		Negative		Negative		Negative		Negative		positive	↑
male	Throat swab	3year5month	fever	Respiratory pathogens nucleic acid six	2023/11/24 9:29:00								620502202006040718	positive	↑	Negative		Negative		Negative		Negative		Negative
male	Throat swab	3month23day	bronchus	Respiratory pathogens nucleic acid six	2023/11/24 9:52:00									positive(+）	↑	Negative(-)		Negative(-)		Negative(-)		Negative(-)		Negative(-)
male	Throat swab	10year7month	Acute bronchitis	Respiratory pathogens nucleic acid six	2023/11/25 0:57:00									Negative(-)		Negative(-)		Negative(-)		Negative(-)		Negative(-)		positive(+)	↑
male	Throat swab	4year11month	Acute suppurative tonsillitis	Respiratory pathogens nucleic acid six	2023/11/25 1:03:00									Negative(-)		Negative(-)		Negative(-)		positive(+）	↑	Negative(-)		Negative(-)
male	Throat swab	2year2month	Laryngeal obstruction	Respiratory pathogens nucleic acid six	2023/11/25 1:44:00									Negative(-)		Negative(-)		Negative(-)		Negative(-)		Negative(-)		Negative(-)
female	Throat swab	3year11month	Acute bronchitis	Respiratory pathogens nucleic acid six	2023/11/25 10:20:00								620103201912241028	positive(+）	↑	Negative(-)		Negative(-)		positive(+）	↑	Negative(-)		Negative(-)
female	Throat swab	7year3month	bronchus	Respiratory pathogens nucleic acid six	2023/11/25 10:25:00									positive(+）	↑	Negative(-)		Negative(-)		Negative(-)		Negative(-)		Negative(-)
male	Throat swab	3year10month	pneumonia	Respiratory pathogens nucleic acid six	2023/11/25 11:15:00									Negative(-)		Negative(-)		Negative(-)		Negative(-)		Negative(-)		Negative(-)
male	Throat swab	6year9month	pneumonia	Respiratory pathogens nucleic acid six	2023/11/25 11:18:00									positive(+）	↑	Negative(-)		Negative(-)		positive(+）	↑	Negative(-)		positive(+)	↑
female	Throat swab	7year6month	fever	Respiratory pathogens nucleic acid six	2023/11/25 11:40:00									Negative(-)		Negative(-)		Negative(-)		Negative(-)		Negative(-)		positive(+)	↑
female	Throat swab	1year11month	Asthmatic bronchuspneumonia	Respiratory pathogens nucleic acid six	2023/11/25 11:49:00									Negative(-)		Negative(-)		positive(+）	↑	Negative(-)		Negative(-)		Negative(-)
male	Throat swab	3year3month	pneumonia	Respiratory pathogens nucleic acid six	2023/11/25 11:50:00									Negative(-)		Negative(-)		positive(+）	↑	Negative(-)		Negative(-)		Negative(-)
female	Throat swab	4year2month	fever	Respiratory pathogens nucleic acid six	2023/11/25 12:06:00								620502201909242041	Negative(-)		positive(+）	↑	positive(+）	↑	Negative(-)		Negative(-)		Negative(-)
female	Throat swab	1year11month	Acute bronchitis	Respiratory pathogens nucleic acid six	2023/11/25 12:47:00									Negative(-)		Negative(-)		Negative(-)		Negative(-)		Negative(-)		Negative(-)
male	Throat swab	1year11month	Acute upper respiratory tract infection	Respiratory pathogens nucleic acid six	2023/11/25 13:09:00									positive(+）	↑	Negative(-)		Negative(-)		Negative(-)		Negative(-)		Negative(-)
female	Throat swab	7month16day	fever	Respiratory pathogens nucleic acid six	2023/11/25 13:35:00								620502202304090027	Negative(-)		Negative(-)		positive(+）	↑	Negative(-)		Negative(-)		Negative(-)
male	Throat swab	6month23day	Asthmatic bronchuspneumonia	Respiratory pathogens nucleic acid six	2023/11/25 13:38:00									Negative(-)		Negative(-)		positive(+）	↑	positive(+）	↑	Negative(-)		Negative(-)
male	Throat swab	3year8month	Acute bronchitis	Respiratory pathogens nucleic acid six	2023/11/25 15:09:00									positive(+）	↑	Negative(-)		Negative(-)		Negative(-)		Negative(-)		Negative(-)
male	Throat swab	1year	Asthmatic bronchuspneumonia	Respiratory pathogens nucleic acid six	2023/11/25 15:35:00									positive(+）	↑	Negative(-)		positive(+）	↑	Negative(-)		Negative(-)		Negative(-)
male	Throat swab	10year4month	Acute bronchitis	Respiratory pathogens nucleic acid six	2023/11/25 16:33:00								621225201307140039	Negative(-)		Negative(-)		Negative(-)		Negative(-)		Negative(-)		positive(+)	↑
female	Throat swab	1year7month	Acute upper respiratory tract infection	Respiratory pathogens nucleic acid six	2023/11/25 17:03:00									positive(+）	↑	Negative(-)		Negative(-)		Negative(-)		Negative(-)		Negative(-)
female	Throat swab	4year3month	Acute bronchitis	Respiratory pathogens nucleic acid six	2023/11/25 17:09:00								620502201908130427	positive(+）	↑	Negative(-)		Negative(-)		Negative(-)		Negative(-)		Negative(-)
male	Throat swab	4month21day	pneumonia	Respiratory pathogens nucleic acid six	2023/11/25 17:26:00									Negative(-)		Negative(-)		Negative(-)		Negative(-)		Negative(-)		Negative(-)
male	Throat swab	5month11day	pneumonia	Respiratory pathogens nucleic acid six	2023/11/25 17:34:00									Negative(-)		Negative(-)		Negative(-)		Negative(-)		Negative(-)		positive(+)	↑
male	Throat swab	5month30day	pneumonia	Respiratory pathogens nucleic acid six	2023/11/25 17:47:00									positive(+）	↑	Negative(-)		Negative(-)		Negative(-)		Negative(-)		Negative(-)
male	Throat swab	5year10month	Lobarpneumonia	Respiratory pathogens nucleic acid six	2023/11/25 17:56:00									Negative(-)		Negative(-)		Negative(-)		positive(+）	↑	Negative(-)		Negative(-)
male	Throat swab	3year4month	pneumonia	Respiratory pathogens nucleic acid six	2023/11/25 18:12:00									Negative(-)		Negative(-)		Negative(-)		Negative(-)		positive(+）	↑	positive(+)	↑
male	Throat swab	3year2month	Acute bronchitis	Respiratory pathogens nucleic acid six	2023/11/25 18:56:00									Negative(-)		Negative(-)		Negative(-)		Negative(-)		positive(+）	↑	positive(+)	↑
female	Throat swab	1month16day	Acute bronchitis	Respiratory pathogens nucleic acid six	2023/11/25 19:10:00									Negative(-)		Negative(-)		Negative(-)		Negative(-)		Negative(-)		Negative(-)
male	Throat swab	3year1month	bronchuspneumonia	Respiratory pathogens nucleic acid six	2023/11/25 19:50:00									Negative(-)		Negative(-)		Negative(-)		Negative(-)		positive(+）	↑	Negative(-)
male	Throat swab	7year10month	Acute upper respiratory tract infection	Respiratory pathogens nucleic acid six	2023/11/25 19:56:00									Negative(-)		Negative(-)		Negative(-)		positive(+）	↑	Negative(-)		Negative(-)
female	Throat swab	11year6month	Acute bronchitis	Respiratory pathogens nucleic acid six	2023/11/25 21:21:00									Negative(-)		Negative(-)		positive(+）	↑	Negative(-)		Negative(-)		positive(+)	↑
female	Throat swab	9month24day	Childhood asthma	Respiratory pathogens nucleic acid six	2023/11/25 22:31:00									Negative(-)		Negative(-)		Negative(-)		Negative(-)		Negative(-)		Negative(-)
female	Throat swab	2year1month	Acute laryngotracheitis	Respiratory pathogens nucleic acid six	2023/11/25 4:49:00									Negative(-)		Negative(-)		positive(+）	↑	Negative(-)		Negative(-)		Negative(-)
female	Throat swab	7year3month	pneumonia	Respiratory pathogens nucleic acid six	2023/11/25 4:59:00									Negative(-)		Negative(-)		Negative(-)		positive(+）	↑	Negative(-)		positive(+)	↑
female	Throat swab	2month7day	bronchuspneumonia	Respiratory pathogens nucleic acid six	2023/11/25 5:01:00									Negative(-)		Negative(-)		positive(+）	↑	Negative(-)		Negative(-)		Negative(-)
male	Throat swab	7year1month	pneumonia	Respiratory pathogens nucleic acid six	2023/11/25 5:12:00									Negative(-)		Negative(-)		Negative(-)		positive(+）	↑	Negative(-)		positive(+)	↑
male	Throat swab	6year4month	pneumonia	Respiratory pathogens nucleic acid six	2023/11/25 5:17:00									positive(+）	↑	Negative(-)		Negative(-)		Negative(-)		Negative(-)		Negative(-)
male	Throat swab	6year	Acute suppurative tonsillitis	Respiratory pathogens nucleic acid six	2023/11/25 7:43:00									Negative(-)		Negative(-)		Negative(-)		positive(+）	↑	Negative(-)		Negative(-)
male	Throat swab	10year8month	fever	Respiratory pathogens nucleic acid six	2023/11/25 9:01:00									Negative(-)		Negative(-)		Negative(-)		Negative(-)		Negative(-)		positive(+)	↑
male	Throat swab	5year4month	pneumonia	Respiratory pathogens nucleic acid six	2023/11/26 0:37:00									Negative(-)		Negative(-)		Negative(-)		positive(+）	↑	Negative(-)		Negative(-)
female	Throat swab	3year8month	Acute upper respiratory tract infection	Respiratory pathogens nucleic acid six	2023/11/26 1:36:00									positive(+）	↑	Negative(-)		Negative(-)		Negative(-)		Negative(-)		Negative(-)
male	Throat swab	7year2month	pneumonia	Respiratory pathogens nucleic acid six	2023/11/26 1:52:00									Negative(-)		positive(+）	↑	Negative(-)		positive(+）	↑	Negative(-)		positive(+)	↑
female	Throat swab	9year10month	pneumonia	Respiratory pathogens nucleic acid six	2023/11/26 10:20:00									positive	↑	Negative		Negative		Negative		Negative		Negative
male	Throat swab	3year7month	acuteRespiratory failure	Respiratory pathogens nucleic acid six	2023/11/26 10:30:00									positive	↑	Negative		Negative		Negative		Negative		Negative
female	Throat swab	1month	Acute bronchitis	Respiratory pathogens nucleic acid six	2023/11/26 11:12:00									Negative		Negative		positive	↑	Negative		Negative		Negative
male	Throat swab	2month25day	Acute bronchitis	Respiratory pathogens nucleic acid six	2023/11/26 12:32:00									Negative		Negative		positive	↑	Negative		Negative		positive	↑
male	Throat swab	4year6month	bronchus	Respiratory pathogens nucleic acid six	2023/11/26 13:07:00									Negative		Negative		Negative		Negative		Negative		Negative
male	Throat swab	5year3month	Acute bronchitis	Respiratory pathogens nucleic acid six	2023/11/26 13:27:00									Negative		Negative		Negative		Negative		Negative		Negative
male	Throat swab	1year	pneumonia	Respiratory pathogens nucleic acid six	2023/11/26 13:35:00									Negative		Negative		positive	↑	Negative		Negative		Negative
male	sputum	3month12day	Acute bronchitis	Respiratory bacterial nucleic acid six	2023/11/26 15:46:00																					Negative(-)		Negative(-)		Negative(-)		Negative(-)		Negative(-)		positive(+）	↑
male	Throat swab	3month12day	Acute bronchitis	Respiratory pathogens nucleic acid six	2023/11/26 15:46:00									Negative		Negative		Negative		Negative		Negative		Negative
male	Throat swab	6year10month	Acute upper respiratory tract infection	Respiratory pathogens nucleic acid six	2023/11/26 15:54:00									positive	↑	Negative		Negative		Negative		Negative		Negative
male	Throat swab	5year3month	Acute upper respiratory tract infection	Respiratory pathogens nucleic acid six	2023/11/26 16:00:00									Negative		Negative		Negative		Negative		Negative		Negative
female	Throat swab	2year1month	acuteAsthmatic bronchus	Respiratory pathogens nucleic acid six	2023/11/26 16:35:00									Negative		Negative		positive	↑	Negative		positive	↑	Negative
male	Throat swab	11year3month	Acute bronchitis	Respiratory pathogens nucleic acid six	2023/11/26 16:41:00								620522201208151513	Negative		Negative		Negative		Negative		Negative		positive	↑
male	Throat swab	4year	fever	Respiratory pathogens nucleic acid six	2023/11/26 17:15:00									positive	↑	Negative		Negative		Negative		Negative		Negative
male	Throat swab	3year10month	Acute bronchitis	Respiratory pathogens nucleic acid six	2023/11/26 17:20:00									positive	↑	Negative		Negative		Negative		Negative		Negative
male	Throat swab	2year7month	Acute bronchitis	Respiratory pathogens nucleic acid six	2023/11/26 17:46:00								620502202104152318	Negative		Negative		positive	↑	Negative		Negative		Negative
female	Throat swab	5year6month	Acute bronchitis	Respiratory pathogens nucleic acid six	2023/11/26 18:09:00									Negative		Negative		Negative		Negative		Negative		Negative
male	Throat swab	6year11month	pneumonia	Respiratory pathogens nucleic acid six	2023/11/26 18:14:00									Negative		Negative		Negative		Negative		Negative		positive	↑
male	Throat swab	11month6day	pneumonia	Respiratory pathogens nucleic acid six	2023/11/26 19:18:00									Negative		Negative		Negative		positive	↑	Negative		Negative
male	Throat swab	7year10month	Acute bronchitis	Respiratory pathogens nucleic acid six	2023/11/26 20:27:00									Negative		Negative		Negative		Negative		Negative		Negative
male	Throat swab	7month24day	fever	Respiratory pathogens nucleic acid six	2023/11/26 20:44:00									Negative		Negative		Negative		Negative		Negative		Negative
male	Throat swab	10month22day	pneumonia	Respiratory pathogens nucleic acid six	2023/11/26 21:02:00									Negative		Negative		positive	↑	Negative		Negative		Negative
male	Throat swab	1year6month	bronchuspneumonia	Respiratory pathogens nucleic acid six	2023/11/26 21:23:00									Negative		positive	↑	Negative		Negative		Negative		Negative
male	Throat swab	10month29day	Acute bronchitis	Respiratory pathogens nucleic acid six	2023/11/26 21:36:00								430723202212280031	positive	↑	Negative		positive	↑	Negative		Negative		Negative
male	Throat swab	6year10month	fever	Respiratory pathogens nucleic acid six	2023/11/26 22:10:00									positive	↑	Negative		Negative		positive	↑	Negative		positive	↑
female	Throat swab	9year1month	Acute bronchitis	Respiratory pathogens nucleic acid six	2023/11/26 22:46:00								620502201409300022	positive	↑	Negative		Negative		Negative		Negative		Negative
male	Throat swab	5month11day	fever	Respiratory pathogens nucleic acid six	2023/11/26 22:52:00									Negative		positive	↑	Negative		Negative		Negative		Negative
female	Throat swab	6year7month	fever	Respiratory pathogens nucleic acid six	2023/11/26 3:24:00								620502201704012322	positive(+）	↑	Negative(-)		Negative(-)		positive(+）	↑	Negative(-)		Negative(-)
male	Throat swab	4year9month	fever	Respiratory pathogens nucleic acid six	2023/11/26 5:48:00								620502201902142013	Negative(-)		Negative(-)		Negative(-)		positive(+）	↑	Negative(-)		Negative(-)
female	Throat swab	3year6month	Acute upper respiratory tract infection	Respiratory pathogens nucleic acid six	2023/11/26 7:45:00								620523202004300020	positive(+）	↑	Negative(-)		Negative(-)		Negative(-)		Negative(-)		positive(+)	↑
male	Throat swab	5year9month	fever	Respiratory pathogens nucleic acid six	2023/11/26 8:17:00								620502201802051616	Negative(-)		Negative(-)		positive(+）	↑	Negative(-)		Negative(-)		Negative(-)
male	Throat swab	3year	pneumonia	Respiratory pathogens nucleic acid six	2023/11/26 8:57:00									Negative		Negative		Negative		Negative		Negative		Negative
male	Throat swab	1year	pneumonia	Respiratory pathogens nucleic acid six	2023/11/26 9:52:00									Negative		Negative		Negative		positive	↑	Negative		Negative
male	Throat swab	3year11month	Acute bronchitis	Respiratory pathogens nucleic acid six	2023/11/26 9:59:00									positive	↑	Negative		Negative		Negative		Negative		Negative
male	Throat swab	1year3month	Acute laryngitis	Respiratory pathogens nucleic acid six	2023/11/27 0:52:00									positive	↑	Negative		Negative		Negative		Negative		Negative
female	Throat swab	3year6month	pneumonia	Respiratory pathogens nucleic acid six	2023/11/27 0:57:00									Negative		Negative		Negative		Negative		Negative		Negative
male	Throat swab	7month2day	bronchuspneumonia	Respiratory pathogens nucleic acid six	2023/11/27 10:32:00									Negative		Negative		Negative		Negative		positive	↑	positive	↑
male	Throat swab	6year11month	pneumonia	Respiratory pathogens nucleic acid six	2023/11/27 11:00:00									positive	↑	Negative		Negative		positive	↑	Negative		positive	↑
male	Throat swab	1year10month	fever	Respiratory pathogens nucleic acid six	2023/11/27 11:07:00									Negative		Negative		Negative		Negative		Negative		Negative
male	Throat swab	2year2month	Acute laryngotracheitis	Respiratory pathogens nucleic acid six	2023/11/27 11:41:00									positive(+）	↑	Negative		Negative		Negative		Negative		Negative
female	Throat swab	6year7month	fever	Respiratory pathogens nucleic acid six	2023/11/27 11:45:00								620502201704242021	positive	↑	Negative		Negative		positive	↑	Negative		Negative
male	Throat swab	9year10month	fever	Respiratory pathogens nucleic acid six	2023/11/27 12:07:00									Negative		Negative		positive	↑	Negative		Negative		Negative
male	Throat swab	5year1month	pneumonia	Respiratory pathogens nucleic acid six	2023/11/27 12:12:00									positive(+）	↑	Negative		Negative		positive	↑	Negative		Negative
male	Throat swab	10year6month	fever	Respiratory pathogens nucleic acid six	2023/11/27 12:16:00								621226201304305076	Negative		Negative		Negative		Negative		Negative		positive	↑
male	Throat swab	4year3month	bronchusasthma(acuteStage of attack)	Respiratory pathogens nucleic acid six	2023/11/27 12:49:00									Negative		Negative		positive	↑	Negative		Negative		Negative
female	Throat swab	11year8month	Acute bronchitis	Respiratory pathogens nucleic acid six	2023/11/27 12:50:00								330382201203071748	Negative		Negative		Negative		Negative		Negative		positive	↑
female	Throat swab	1year5month	pneumonia	Respiratory pathogens nucleic acid six	2023/11/27 12:58:00									positive	↑	Negative		Negative		Negative		Negative		Negative
female	Throat swab	1year11month	Acute laryngitis	Respiratory pathogens nucleic acid six	2023/11/27 13:01:00									positive	↑	Negative		Negative		Negative		Negative		Negative
male	Throat swab	3year7month	Acute bronchitis	Respiratory pathogens nucleic acid six	2023/11/27 13:07:00									positive(+）	↑	Negative		Negative		Negative		positive	↑	Negative
male	Throat swab	5year7month	Acute bronchitis	Respiratory pathogens nucleic acid six	2023/11/27 13:47:00									positive(+）	↑	Negative		Negative		Negative		Negative		Negative
female	Throat swab	4year1month	Unexplained convulsion	Respiratory pathogens nucleic acid six	2023/11/27 14:01:00									positive(+）	↑	Negative		positive(+）	↑	positive	↑	Negative		Negative
male	Throat swab	6year2month	pneumonia	Respiratory pathogens nucleic acid six	2023/11/27 15:04:00									positive(+）	↑	Negative		Negative		Negative		Negative		positive	↑
female	Throat swab	7year	bronchus	Respiratory pathogens nucleic acid six	2023/11/27 15:10:00									positive(+）	↑	Negative		Negative		positive	↑	positive	↑	positive	↑
male	Throat swab	10year	pneumoniapneumonia	Respiratory pathogens nucleic acid six	2023/11/27 15:16:00									positive(+）	↑	positive(+）	↑	Negative		Negative(-)		Negative(-)		positive	↑
male	Throat swab	1year8month	Acute bronchitis	Respiratory pathogens nucleic acid six	2023/11/27 15:50:00									positive(+）	↑	Negative		Negative		Negative		Negative		positive	↑
female	Throat swab	7year1month	pneumonia	Respiratory pathogens nucleic acid six	2023/11/27 16:25:00									positive	↑	Negative		Negative		Negative		Negative		positive	↑
female	Throat swab	3year6month	Unexplained convulsion	Respiratory pathogens nucleic acid six	2023/11/27 16:31:00									positive(+）	↑	Negative		Negative		Negative		Negative		positive	↑
male	Throat swab	7year5month	Acute bronchitis	Respiratory pathogens nucleic acid six	2023/11/27 16:38:00								620502201606120418	positive	↑	Negative		Negative		Negative		Negative		Negative
female	Throat swab	4year7month	Acute laryngitis	Respiratory pathogens nucleic acid six	2023/11/27 16:39:00									positive	↑	Negative		Negative		Negative		Negative		Negative
female	Throat swab	7year3month	Acute bronchitis	Respiratory pathogens nucleic acid six	2023/11/27 16:40:00								62050220160731234X	Negative		positive	↑	Negative		Negative		Negative		Negative
female	Throat swab	7year3month	pneumonia	Respiratory pathogens nucleic acid six	2023/11/27 17:01:00									positive(+）	↑	Negative		Negative		Negative		Negative		Negative
female	Throat swab	5year10month	pneumonia	Respiratory pathogens nucleic acid six	2023/11/27 17:27:00									positive(+）	↑	positive(+）	↑	Negative		Negative		Negative		Negative
male	Throat swab	1year4month	pneumonia	Respiratory pathogens nucleic acid six	2023/11/27 17:55:00									positive(+）	↑	positive	↑	Negative		Negative		Negative		positive(+)	↑
female	Throat swab	3year8month	Acute suppurative tonsillitis	Respiratory pathogens nucleic acid six	2023/11/27 18:10:00									positive(+）	↑	Negative		Negative		positive	↑	Negative		Negative
male	Throat swab	5year5month	pneumonia	Respiratory pathogens nucleic acid six	2023/11/27 18:15:00									positive(+）	↑	positive	↑	Negative		Negative		Negative		Negative
female	Throat swab	3year3month	Acute bronchitis	Respiratory pathogens nucleic acid six	2023/11/27 18:39:00									positive(+）	↑	Negative		Negative		Negative		Negative		positive	↑
male	Throat swab	1month22day	Acute bronchitis	Respiratory pathogens nucleic acid six	2023/11/27 18:54:00									positive(+）	↑	Negative		Negative		Negative		Negative		Negative
male	Throat swab	5year2month	Acute bronchitis	Respiratory pathogens nucleic acid six	2023/11/27 19:25:00								620502201809212910	positive(+）	↑	positive(+）	↑	Negative(-)		Negative(-)		Negative(-)		Negative(-)
female	Throat swab	5month7day	fever	Respiratory pathogens nucleic acid six	2023/11/27 19:50:00									positive(+）	↑	Negative		Negative		Negative		Negative		Negative
female	Throat swab	4year6month	bronchuspneumonia	Respiratory pathogens nucleic acid six	2023/11/27 2:30:00									positive	↑	Negative		Negative		Negative		Negative		positive	↑
male	Throat swab	5month22day	bronchuspneumonia	Respiratory pathogens nucleic acid six	2023/11/27 20:25:00									Negative		Negative		Negative		Negative		Negative		Negative
female	sputum	8month27day	Acute bronchitis	Respiratory bacterial nucleic acid six	2023/11/27 20:28:00																					Negative(-)		Negative(-)		Negative(-)		positive(+）	↑	Negative(-)		Negative(-)
female	Throat swab	8month27day	Acute bronchitis	Respiratory pathogens nucleic acid six	2023/11/27 20:28:00									positive(+）	↑	Negative		positive	↑	Negative		positive	↑	Negative
male	Throat swab	7year6month	Acute upper respiratory tract infection	Respiratory pathogens nucleic acid six	2023/11/27 20:44:00								620502201605072012	Negative(-)		Negative(-)		Negative(-)		positive(+）	↑	Negative(-)		positive(+)	↑
female	Throat swab	3year7month	Acute bronchitis	Respiratory pathogens nucleic acid six	2023/11/27 21:07:00								620502202004070024	positive(+）	↑	Negative		positive	↑	Negative		Negative		Negative
male	Throat swab	6year10month	pneumonia	Respiratory pathogens nucleic acid six	2023/11/27 21:15:00									positive	↑	Negative		Negative		Negative		Negative		Negative
male	Throat swab	2year11month	acuteAsthmatic bronchus	Respiratory pathogens nucleic acid six	2023/11/27 21:54:00									positive(+）	↑	Negative		Negative		Negative		positive	↑	Negative
female	Throat swab	3year1month	fever	Respiratory pathogens nucleic acid six	2023/11/27 22:39:00									Negative		Negative		Negative		Negative		Negative		Negative
male	Throat swab	5month5day	fever	Respiratory pathogens nucleic acid six	2023/11/27 22:42:00									Negative		positive	↑	Negative		Negative		Negative		Negative
female	Throat swab	7year1month	bronchuspneumonia	Respiratory pathogens nucleic acid six	2023/11/27 22:51:00									positive	↑	Negative		Negative		Negative		Negative		Negative
male	Throat swab	13year	bronchuspneumonia	Respiratory pathogens nucleic acid six	2023/11/27 23:20:00									Negative		positive	↑	Negative		Negative		Negative		Negative
male	Throat swab	11year10month	fever	Respiratory pathogens nucleic acid six	2023/11/27 4:54:00									positive	↑	Negative		Negative		Negative		Negative		positive	↑
male	Throat swab	10year4month	Acute bronchitis	Respiratory pathogens nucleic acid six	2023/11/27 8:28:00								620502201307134318	Negative		Negative		Negative		Negative		Negative		positive	↑
female	Throat swab	4year1month	Acute upper respiratory tract infection	Respiratory pathogens nucleic acid six	2023/11/27 8:32:00								620502201910031321	positive	↑	Negative		Negative		Negative		Negative		Negative
male	Throat swab	9year	Acute bronchitis	Respiratory pathogens nucleic acid six	2023/11/27 9:00:00								620502201411262010	Negative		Negative		Negative		Negative		Negative		positive	↑
female	Throat swab	10year4month	Acute upper respiratory tract infection	Respiratory pathogens nucleic acid six	2023/11/27 9:00:00								620521201306285682	Negative		Negative		positive	↑	positive	↑	Negative		Negative
female	Throat swab	6year10month	Acute bronchitis	Respiratory pathogens nucleic acid six	2023/11/27 9:13:00								621226201701090021	Negative		Negative		Negative		Negative		Negative		positive	↑
female	Throat swab	9year8month	bronchuspneumonia	Respiratory pathogens nucleic acid six	2023/11/27 9:18:00								620522201403053126	Negative		positive	↑	Negative		Negative		positive	↑	Negative
male	Throat swab	4year1month	Acute bronchitis	Respiratory pathogens nucleic acid six	2023/11/27 9:20:00								620502201910052018	Negative		Negative		positive	↑	Negative		Negative		Negative
male	Throat swab	6year10month	Acute bronchitis	Respiratory pathogens nucleic acid six	2023/11/27 9:54:00								620522201701030010	positive	↑	Negative		positive	↑	Negative		Negative		Negative
male	Throat swab	2year2month	Acute upper respiratory tract infection	Respiratory pathogens nucleic acid six	2023/11/28 0:46:00									Negative		Negative		Negative		Negative		positive	↑	Negative
male	Throat swab	1year9month	Acute laryngitis	Respiratory pathogens nucleic acid six	2023/11/28 0:52:00									positive	↑	Negative		Negative		Negative		Negative		Negative
female	Throat swab	3year2month	pneumonia	Respiratory pathogens nucleic acid six	2023/11/28 1:39:00									Negative		Negative		Negative		Negative		Negative		Negative
male	Throat swab	9year5month	fever	Respiratory pathogens nucleic acid six	2023/11/28 10:09:00								620522201406051513	positive(+）	↑	Negative(-)		Negative(-)		Negative(-)		Negative(-)		Negative(-)
female	Throat swab	9year5month	Acute bronchitis	Respiratory pathogens nucleic acid six	2023/11/28 10:21:00								620503201406020806	positive(+）	↑	Negative(-)		Negative(-)		Negative(-)		Negative(-)		Negative(-)
female	Throat swab	6year8month	fever	Respiratory pathogens nucleic acid six	2023/11/28 10:37:00								62052320170313002X	positive(+）	↑	Negative(-)		Negative(-)		Negative(-)		Negative(-)		Negative(-)
female	Throat swab	4year5month	Acute upper respiratory tract infection	Respiratory pathogens nucleic acid six	2023/11/28 10:39:00								620502201906080024	positive(+）	↑	Negative(-)		Negative(-)		Negative(-)		Negative(-)		Negative(-)
female	Throat swab	10year3month	pneumoniapneumonia	Respiratory pathogens nucleic acid six	2023/11/28 11:18:00									Negative		Negative		Negative		positive(+）	↑	Negative		positive	↑
female	Throat swab	11month	fever	Respiratory pathogens nucleic acid six	2023/11/28 11:22:00									Negative		Negative		Negative		Negative		Negative		Negative
female	Throat swab	4year2month	fever	Respiratory pathogens nucleic acid six	2023/11/28 11:28:00									Negative		Negative		Negative		Negative		Negative		Negative
male	Throat swab	1year	Infantile diarrhea	Respiratory pathogens nucleic acid six	2023/11/28 11:36:00									Negative		Negative		Negative		positive(+）	↑	positive	↑	positive(+)	↑
male	Throat swab	8year3month	Acute bronchitis	Respiratory pathogens nucleic acid six	2023/11/28 11:40:00								620524201508194673	Negative(-)		Negative(-)		Negative(-)		Negative(-)		Negative(-)		positive(+)	↑
female	Throat swab	5year10month	Acute upper respiratory tract infection	Respiratory pathogens nucleic acid six	2023/11/28 11:52:00									positive(+）	↑	Negative		Negative		Negative		Negative		Negative
male	Throat swab	8year4month	Acute bronchitis	Respiratory pathogens nucleic acid six	2023/11/28 12:02:00									Negative		Negative		Negative		Negative		Negative		Negative
male	Throat swab	5year1month	bronchuspneumonia	Respiratory pathogens nucleic acid six	2023/11/28 12:29:00									Negative		Negative		Negative		positive	↑	Negative		Negative
male	Throat swab	1year1month	Acute bronchitis	Respiratory pathogens nucleic acid six	2023/11/28 13:04:00									positive	↑	Negative		positive(+）	↑	Negative		Negative		Negative
male	Throat swab	6year10month	Acute bronchitis	Respiratory pathogens nucleic acid six	2023/11/28 13:11:00									Negative		positive	↑	Negative		positive	↑	Negative		Negative
male	Throat swab	1year10month	Acute upper respiratory tract infection	Respiratory pathogens nucleic acid six	2023/11/28 13:26:00									Negative		positive	↑	Negative		positive	↑	Negative		Negative
male	Throat swab	8month8day	fever	Respiratory pathogens nucleic acid six	2023/11/28 13:29:00									positive	↑	Negative		Negative		Negative		Negative		Negative
female	Throat swab	4month22day	pneumonia	Respiratory pathogens nucleic acid six	2023/11/28 13:31:00									Negative		Negative		positive	↑	Negative		Negative		Negative
female	Throat swab	1year7month	Febrile convulsion	Respiratory pathogens nucleic acid six	2023/11/28 13:36:00									positive	↑	Negative		Negative		Negative		Negative		Negative
female	Throat swab	7year7month	pneumonia	Respiratory pathogens nucleic acid six	2023/11/28 13:45:00									positive(+）	↑	Negative		Negative		Negative		Negative		Negative
male	Throat swab	1year4month	fever	Respiratory pathogens nucleic acid six	2023/11/28 15:13:00									Negative		Negative		Negative		positive(+）	↑	Negative		Negative
male	Throat swab	7year	pneumonia	Respiratory pathogens nucleic acid six	2023/11/28 15:30:00									Negative		Negative		Negative		Negative		Negative		positive(+)	↑
female	Throat swab	10year	fever	Respiratory pathogens nucleic acid six	2023/11/28 15:56:00									Negative		Negative		positive	↑	positive	↑	Negative		Negative
female	Throat swab	7year6month	fever	Respiratory pathogens nucleic acid six	2023/11/28 16:02:00									Negative		positive	↑	Negative		Negative		Negative		Negative
female	Throat swab	12year	Acute bronchitis	Respiratory pathogens nucleic acid six	2023/11/28 16:13:00									Negative		Negative		Negative		Negative		Negative		Negative
male	Throat swab	2month8day	Acute bronchitis	Respiratory pathogens nucleic acid six	2023/11/28 16:32:00									positive	↑	Negative		Negative		Negative		Negative		positive(+)	↑
male	Throat swab	1year10month	fever	Respiratory pathogens nucleic acid six	2023/11/28 16:45:00									positive	↑	Negative		Negative		Negative		Negative		Negative
male	Throat swab	12year	acuteurticaria	Respiratory pathogens nucleic acid six	2023/11/28 16:52:00									positive	↑	Negative		Negative		Negative		Negative		positive	↑
female	Throat swab	6year3month	Lobarpneumonia	Respiratory pathogens nucleic acid six	2023/11/28 17:18:00									Negative		Negative		Negative		Negative		Negative		positive(+)	↑
female	Throat swab	11year2month	fever	Respiratory pathogens nucleic acid six	2023/11/28 17:21:00									Negative		Negative		Negative		Negative		Negative		Negative
male	Throat swab	3year3month	Acute bronchitis	Respiratory pathogens nucleic acid six	2023/11/28 17:39:00								620522202008214617	positive(+）	↑	Negative		Negative		Negative		Negative		Negative
male	Throat swab	6year9month	pneumonia	Respiratory pathogens nucleic acid six	2023/11/28 17:50:00									positive	↑	positive(+）	↑	Negative		Negative		positive(+）	↑	Negative
male	Throat swab	6year3month	Acute bronchitis	Respiratory pathogens nucleic acid six	2023/11/28 17:53:00								62050220170812003X	Negative		Negative		Negative		Negative		Negative		positive	↑
male	Throat swab	6year5month	pneumonia	Respiratory pathogens nucleic acid six	2023/11/28 18:06:00									positive(+）	↑	Negative		Negative		Negative		Negative		Negative
male	Throat swab	6year8month	Acute upper respiratory tract infection	Respiratory pathogens nucleic acid six	2023/11/28 18:25:00								15080220170321011X	Negative		positive	↑	Negative		positive	↑	Negative		Negative
female	Throat swab	1month21day	Acute upper respiratory tract infection	Respiratory pathogens nucleic acid six	2023/11/28 18:49:00									Negative		Negative		Negative		Negative		Negative		Negative
male	Throat swab	9year5month	fever	Respiratory pathogens nucleic acid six	2023/11/28 19:44:00								620502201406180715	positive(+）	↑	Negative(-)		positive(+）	↑	Negative(-)		Negative(-)		Negative(-)
female	Throat swab	5year9month	Acute upper respiratory tract infection	Respiratory pathogens nucleic acid six	2023/11/28 19:54:00								620502201802010427	Negative		Negative		Negative		Negative		positive(+）	↑	Negative
female	Throat swab	5year4month	pneumonia，其他的 病原体未特指的	Respiratory pathogens nucleic acid six	2023/11/28 19:56:00									Negative		Negative		Negative		Negative		Negative		positive(+)	↑
male	Throat swab	4year	fever	Respiratory pathogens nucleic acid six	2023/11/28 19:57:00								62052220191112033X	positive(+）	↑	positive	↑	Negative		Negative		Negative		Negative
male	Throat swab	3year7month	pneumoniapneumonia	Respiratory pathogens nucleic acid six	2023/11/28 20:21:00									Negative		Negative		Negative		Negative		Negative		Negative
female	Throat swab	5year10month	pneumoniapneumonia	Respiratory pathogens nucleic acid six	2023/11/28 21:29:00									Negative		Negative		positive	↑	positive	↑	Negative		positive	↑
male	Throat swab	9year11month	Acute bronchitis	Respiratory pathogens nucleic acid six	2023/11/28 21:48:00									Negative		Negative		Negative		positive	↑	Negative		Negative
male	Throat swab	5year2month	pneumonia	Respiratory pathogens nucleic acid six	2023/11/28 22:23:00									Negative		Negative		Negative		Negative		Negative		Negative
male	Throat swab	3year6month	Unexplained convulsion	Respiratory pathogens nucleic acid six	2023/11/28 23:04:00									Negative		Negative		positive	↑	Negative		Negative		Negative
male	Throat swab	5year	Acute bronchitis	Respiratory pathogens nucleic acid six	2023/11/28 23:50:00									Negative		Negative		Negative		Negative		Negative		Negative
male	Throat swab	4year8month	Acute bronchitis	Respiratory pathogens nucleic acid six	2023/11/28 7:55:00								620502201903202057	positive	↑	Negative		Negative		Negative		Negative		Negative
male	Throat swab	9year4month	fever	Respiratory pathogens nucleic acid six	2023/11/28 8:29:00								621226201407051451	Negative(-)		positive(+）	↑	positive(+）	↑	Negative(-)		Negative(-)		Negative(-)
female	Throat swab	1year1month	pneumonia	Respiratory pathogens nucleic acid six	2023/11/28 9:04:00									positive(+）	↑	Negative(-)		positive(+）	↑	Negative(-)		Negative(-)		Negative(-)
female	Throat swab	14year	Acute upper respiratory tract infection	Respiratory pathogens nucleic acid six	2023/11/28 9:05:00								620521200906060028	positive(+）	↑	Negative		Negative		Negative		Negative		Negative
male	Throat swab	4year7month	Febrile convulsion	Respiratory pathogens nucleic acid six	2023/11/28 9:05:00									Negative(-)		Negative(-)		Negative(-)		Negative(-)		Negative(-)		Negative(-)
female	Throat swab	17day17hour	newbornpneumonia	Respiratory pathogens nucleic acid six	2023/11/28 9:06:00									Negative(-)		Negative(-)		positive(+）	↑	Negative(-)		Negative(-)		Negative(-)
male	Throat swab	3year9month	Acute upper respiratory tract infection	Respiratory pathogens nucleic acid six	2023/11/28 9:16:00								620521202002146717	positive(+）	↑	Negative(-)		positive(+）	↑	Negative(-)		Negative(-)		Negative(-)
male	Throat swab	3month18day	pneumonia	Respiratory pathogens nucleic acid six	2023/11/28 9:31:00									Negative		Negative		Negative		Negative		Negative		Negative
male	Throat swab	1year1month	Asthmatic bronchuspneumonia	Respiratory pathogens nucleic acid six	2023/11/28 9:54:00									Negative		Negative		Negative		positive	↑	Negative		positive	↑
male	Throat swab	12year	fever	Respiratory pathogens nucleic acid six	2023/11/28 9:54:00								620523201111065594	Negative(-)		Negative(-)		Negative(-)		Negative(-)		Negative(-)		Negative(-)
male	Throat swab	13year	Unexplained convulsion	Respiratory pathogens nucleic acid six	2023/11/29 1:20:00									positive	↑	Negative		Negative		Negative		Negative		Negative
male	Throat swab	4year2month	Acute bronchitis	Respiratory pathogens nucleic acid six	2023/11/29 10:00:00								620502201909230411	positive	↑	Negative		Negative		Negative		Negative		Negative
male	Throat swab	1year5month	Acute upper respiratory tract infection	Respiratory pathogens nucleic acid six	2023/11/29 10:09:00								620522202206294419	Negative		Negative		Negative		Negative		Negative		Negative
male	Throat swab	6year2month	Acute upper respiratory tract infection	Respiratory pathogens nucleic acid six	2023/11/29 10:21:00								620502201709090039	Negative		Negative		Negative		positive	↑	Negative		Negative
male	Throat swab	8year8month	Acute upper respiratory tract infection	Respiratory pathogens nucleic acid six	2023/11/29 10:29:00								620502201503290414	Negative		Negative		Negative		Negative		Negative		Negative
male	Throat swab	8year3month	fever	Respiratory pathogens nucleic acid six	2023/11/29 10:36:00								620502201508112334	Negative		Negative		Negative		Negative		Negative		positive	↑
male	Throat swab	2month11day	pneumonia	Respiratory pathogens nucleic acid six	2023/11/29 10:55:00									positive	↑	Negative		Negative		Negative		Negative		Negative
female	Throat swab	6year11month	fever	Respiratory pathogens nucleic acid six	2023/11/29 11:00:00									Negative		Negative		Negative		Negative		Negative		positive	↑
male	Throat swab	7year6month	Acute bronchitis	Respiratory pathogens nucleic acid six	2023/11/29 11:05:00								620522201605254639	positive	↑	Negative		Negative		Negative		Negative		Negative
male	Throat swab	1year2month	Acute bronchitis	Respiratory pathogens nucleic acid six	2023/11/29 12:39:00									Negative		Negative		Negative		positive	↑	Negative		Negative
male	Throat swab	5year1month	Acute upper respiratory tract infection	Respiratory pathogens nucleic acid six	2023/11/29 12:46:00									positive	↑	Negative		Negative		Negative		Negative		Negative
male	Throat swab	1year8month	Acute laryngotracheitis	Respiratory pathogens nucleic acid six	2023/11/29 12:51:00									positive	↑	Negative		Negative		Negative		Negative		Negative
male	Throat swab	7year	Acute bronchitis	Respiratory pathogens nucleic acid six	2023/11/29 13:37:00									positive	↑	Negative		Negative		Negative		Negative		Negative
male	Throat swab	11month8day	bronchuspneumonia	Respiratory pathogens nucleic acid six	2023/11/29 13:49:00									Negative		Negative		Negative		Negative		Negative		positive	↑
female	Throat swab	9year4month	Acute bronchitis	Respiratory pathogens nucleic acid six	2023/11/29 14:07:00								620502201407031324	Negative		Negative		Negative		positive	↑	Negative		positive	↑
female	Throat swab	3year3month	Acute laryngotracheitis	Respiratory pathogens nucleic acid six	2023/11/29 14:25:00									positive	↑	Negative		Negative		Negative		Negative		Negative
male	Throat swab	8year3month	Acute bronchitis	Respiratory pathogens nucleic acid six	2023/11/29 14:27:00									positive	↑	Negative		Negative		Negative		Negative		Negative
female	Throat swab	6year7month	fever	Respiratory pathogens nucleic acid six	2023/11/29 14:45:00								620502201704162021	positive(+）	↑	Negative(-)		Negative(-)		Negative(-)		Negative(-)		Negative(-)
female	Throat swab	7year3month	Acute upper respiratory tract infection	Respiratory pathogens nucleic acid six	2023/11/29 14:50:00									Negative		Negative		Negative		positive	↑	Negative		Negative
male	Throat swab	2year5month	acutetonsillitis	Respiratory pathogens nucleic acid six	2023/11/29 14:55:00									positive	↑	Negative		Negative		positive	↑	positive	↑	Negative
male	Throat swab	7year2month	Acute bronchitis	Respiratory pathogens nucleic acid six	2023/11/29 15:05:00								620502201609180416	Negative		Negative		Negative		Negative		Negative		Negative
male	Throat swab	3year10month	Acute bronchitis	Respiratory pathogens nucleic acid six	2023/11/29 15:10:00								620523202001291093	positive	↑	Negative		Negative		Negative		Negative		Negative
male	Throat swab	6year6month	pneumonia	Respiratory pathogens nucleic acid six	2023/11/29 15:34:00									positive	↑	Negative		Negative		Negative		Negative		Negative
male	Throat swab	4month18day	bronchuspneumonia	Respiratory pathogens nucleic acid six	2023/11/29 15:39:00									Negative		Negative		positive(+）	↑	Negative		Negative		Negative
female	Throat swab	9year1month	Acute bronchitis	Respiratory pathogens nucleic acid six	2023/11/29 15:48:00									Negative		Negative		Negative		Negative		Negative		positive(+)	↑
female	Throat swab	10year3month	Acute bronchitis	Respiratory pathogens nucleic acid six	2023/11/29 15:50:00								620502201308271349	Negative		positive	↑	Negative		positive	↑	Negative		positive	↑
male	Throat swab	13year	fever	Respiratory pathogens nucleic acid six	2023/11/29 16:11:00								620522201008200018	Negative		Negative		Negative		positive	↑	Negative		Negative
male	Throat swab	4month4day	pneumonia	Respiratory pathogens nucleic acid six	2023/11/29 16:16:00									Negative		Negative		positive	↑	positive	↑	positive	↑	Negative
male	Throat swab	7month2day	pneumonia	Respiratory pathogens nucleic acid six	2023/11/29 16:18:00									Negative		Negative		Negative		positive(+）	↑	Negative		Negative
male	Throat swab	6year7month	bronchuspneumonia	Respiratory pathogens nucleic acid six	2023/11/29 16:31:00									Negative		Negative		Negative		Negative		Negative		positive	↑
male	Throat swab	2year11month	pneumonia	Respiratory pathogens nucleic acid six	2023/11/29 16:35:00									Negative		Negative		Negative		Negative		Negative		positive	↑
male	Throat swab	8year9month	Routine health checks for children	Respiratory pathogens nucleic acid six	2023/11/29 16:52:00									Negative		Negative		Negative		Negative		Negative		Negative
male	Throat swab	7year7month	Acute bronchitis	Respiratory pathogens nucleic acid six	2023/11/29 17:04:00									Negative		Negative		Negative		Negative		Negative		Negative
female	Throat swab	12year	fever	Respiratory pathogens nucleic acid six	2023/11/29 17:17:00									Negative		Negative		Negative		Negative		Negative		Negative
male	Throat swab	2year	pneumonia	Respiratory pathogens nucleic acid six	2023/11/29 17:23:00									Negative		Negative		Negative		Negative		Negative		positive	↑
female	Throat swab	7year3month	pneumonia	Respiratory pathogens nucleic acid six	2023/11/29 17:26:00									Negative		Negative		Negative		positive(+）	↑	Negative		positive(+)	↑
female	Throat swab	4year8month	pneumonia	Respiratory pathogens nucleic acid six	2023/11/29 17:27:00									Negative		Negative		Negative		Negative		Negative		Negative
male	Throat swab	7year6month	pneumonia	Respiratory pathogens nucleic acid six	2023/11/29 18:15:00									Negative		Negative		Negative		Negative		Negative		positive	↑
male	Throat swab	6year	Acute bronchitis	Respiratory pathogens nucleic acid six	2023/11/29 18:27:00									positive	↑	Negative		Negative		Negative		Negative		Negative
male	Throat swab	1year5month	pneumonia	Respiratory pathogens nucleic acid six	2023/11/29 18:40:00									Negative		Negative		Negative		Negative		Negative		positive	↑
female	Throat swab	9year4month	Acute bronchitis	Respiratory pathogens nucleic acid six	2023/11/29 19:40:00								620502201407175328	Negative(-)		positive(+）	↑	Negative(-)		Negative(-)		Negative(-)		Negative(-)
male	Throat swab	10year	Acute bronchitis	Respiratory pathogens nucleic acid six	2023/11/29 19:46:00								620502201311102319	Negative(-)		Negative(-)		Negative(-)		positive(+）	↑	Negative(-)		Negative(-)
male	Throat swab	1year2month	Acute laryngitis	Respiratory pathogens nucleic acid six	2023/11/29 19:53:00									Negative(-)		Negative(-)		Negative(-)		Negative(-)		positive(+）	↑	Negative(-)
male	Throat swab	12year	Acute bronchitis	Respiratory pathogens nucleic acid six	2023/11/29 20:19:00									Negative		Negative		Negative		Negative		Negative		positive	↑
female	Throat swab	6year11month	Acute bronchitis	Respiratory pathogens nucleic acid six	2023/11/29 20:55:00								620502201612240723	Negative(-)		Negative(-)		Negative(-)		positive(+）	↑	Negative(-)		Negative(-)
male	Throat swab	10year2month	acuteurticaria	Respiratory pathogens nucleic acid six	2023/11/29 21:25:00									Negative		Negative		Negative		positive	↑	Negative		Negative
male	Throat swab	11month7day	Acute bronchitis	Respiratory pathogens nucleic acid six	2023/11/29 21:41:00									positive	↑	Negative		Negative		Negative		Negative		Negative
male	Throat swab	3year1month	severe casepneumonia	Respiratory pathogens nucleic acid six	2023/11/29 22:10:00									positive	↑	Negative		Negative		positive	↑	Negative		Negative
male	Throat swab	3year7month	Acute upper respiratory tract infection	Respiratory pathogens nucleic acid six	2023/11/29 22:47:00								620502202004272953	positive(+）	↑	Negative(-)		Negative(-)		Negative(-)		Negative(-)		Negative(-)
female	Throat swab	3year8month	Febrile convulsion	Respiratory pathogens nucleic acid six	2023/11/29 3:57:00									positive	↑	Negative		Negative		positive	↑	Negative		Negative
male	Throat swab	8year	Acute upper respiratory tract infection	Respiratory pathogens nucleic acid six	2023/11/29 6:59:00									Negative		Negative		Negative		Negative		Negative		Negative
male	Throat swab	6year6month	bronchusasthma(acuteStage of attack)	Respiratory pathogens nucleic acid six	2023/11/29 7:45:00									Negative		Negative		positive	↑	Negative		Negative		Negative
male	Throat swab	2year11month	Acute bronchitis	Respiratory pathogens nucleic acid six	2023/11/29 8:18:00									positive	↑	Negative		Negative		Negative		Negative		Negative
female	Throat swab	4year8month	fever	Respiratory pathogens nucleic acid six	2023/11/29 9:10:00								620502201903061346	positive(+）	↑	Negative		Negative		Negative		Negative		Negative
female	Throat swab	9year1month	Acute bronchitis	Respiratory pathogens nucleic acid six	2023/11/29 9:16:00								620503201410145345	positive(+）	↑	Negative(-)		Negative(-)		Negative(-)		positive(+）	↑	Negative(-)
female	Throat swab	10year5month	Acute bronchitis	Respiratory pathogens nucleic acid six	2023/11/29 9:18:00									positive(+）	↑	Negative(-)		positive(+）	↑	Negative(-)		Negative(-)		Negative(-)
male	Throat swab	9year9month	fever	Respiratory pathogens nucleic acid six	2023/11/29 9:21:00									positive(+）	↑	Negative(-)		positive(+）	↑	Negative(-)		Negative(-)		Negative(-)
female	Throat swab	3year7month	Acute bronchitis	Respiratory pathogens nucleic acid six	2023/11/29 9:25:00								620503202004208042	Negative(-)		Negative(-)		Negative(-)		positive(+）	↑	Negative(-)		Negative(-)
male	Throat swab	6year11month	Acute upper respiratory tract infection	Respiratory pathogens nucleic acid six	2023/11/29 9:41:00									Negative		positive	↑	Negative		Negative		Negative		Negative
male	Throat swab	9year9month	Acute upper respiratory tract infection	Respiratory pathogens nucleic acid six	2023/11/29 9:47:00								620503201402220712	positive(+）	↑	Negative(-)		Negative(-)		positive(+）	↑	positive(+）	↑	Negative(-)
male	Throat swab	7year11month	Acute upper respiratory tract infection	Respiratory pathogens nucleic acid six	2023/11/29 9:51:00									positive(+）	↑	Negative		Negative		Negative		Negative		Negative
male	Throat swab	0hour40min钟	congenitalpneumonia	Respiratory pathogens nucleic acid six	2023/11/29 9:52:00									Negative		Negative		Negative		Negative		Negative		Negative
female	Throat swab	4year1month	fever	Respiratory pathogens nucleic acid six	2023/11/29 9:56:00								620503201910120021	Negative(-)		Negative(-)		Negative(-)		positive(+）	↑	Negative(-)		Negative(-)
male	sputum	10year2month	pneumonia	Respiratory bacterial nucleic acid six	2023/11/3 1:13:00																					Negative(-)		Negative(-)		Negative(-)		positive(+）	↑	Negative(-)		positive(+）	↑
male	Throat swab	10year2month	pneumonia	Respiratory pathogens nucleic acid six	2023/11/3 1:13:00									Negative		Negative		Negative		Negative		Negative		positive	↑
male	Throat swab	2year1month	pneumonia	Respiratory pathogens nucleic acid six	2023/11/3 1:51:00									Negative		Negative		Negative		Negative		Negative		Negative
male	Throat swab	1year1month	dyspnea	Respiratory pathogens nucleic acid six	2023/11/3 10:57:00									Negative		Negative		Negative		Negative		positive	↑	Negative
male	Throat swab	8year3month	Acute bronchitis	Respiratory pathogens nucleic acid six	2023/11/3 11:21:00									Negative		Negative		Negative		Negative		Negative		positive	↑
male	Throat swab	1year5month	dyspnea	Respiratory pathogens nucleic acid six	2023/11/3 11:46:00									Negative		Negative		Negative		Negative		Negative		Negative
female	sputum	7year7month	Acute bronchitis	Respiratory bacterial nucleic acid six	2023/11/3 11:55:00																					Negative(-)		Negative(-)		Negative(-)		positive(+）	↑	Negative(-)		Negative(-)
female	Throat swab	7year7month	Acute bronchitis	Respiratory pathogens nucleic acid six	2023/11/3 11:55:00									Negative		Negative		Negative		Negative		Negative		positive	↑
male	Throat swab	3year2month	Acute bronchitis	Respiratory pathogens nucleic acid six	2023/11/3 11:55:00									Negative		Negative		Negative		Negative		Negative		Negative
female	Throat swab	4year6month	Acute suppurative tonsillitis	Respiratory pathogens nucleic acid six	2023/11/3 12:38:00									Negative		Negative		Negative		Negative		positive	↑	Negative
male	Throat swab	10month14day	pneumonia	Respiratory pathogens nucleic acid six	2023/11/3 12:50:00									Negative		Negative		positive	↑	Negative		Negative		positive	↑
female	sputum	4year3month	pneumonia	Respiratory bacterial nucleic acid six	2023/11/3 12:58:00																					Negative(-)		Negative(-)		Negative(-)		positive(+）	↑	Negative(-)		positive(+）	↑
female	Throat swab	4year3month	pneumonia	Respiratory pathogens nucleic acid six	2023/11/3 12:58:00									Negative		Negative		Negative		Negative		Negative		Negative
male	Throat swab	5year7month	Unexplained convulsion	Respiratory pathogens nucleic acid six	2023/11/3 13:31:00									Negative		Negative		Negative		Negative		Negative		Negative
male	Throat swab	1year5month	Unexplained convulsion	Respiratory pathogens nucleic acid six	2023/11/3 13:39:00									Negative		Negative		Negative		Negative		Negative		Negative
female	Throat swab	3year7month	fever	Respiratory pathogens nucleic acid six	2023/11/3 15:15:00									Negative		Negative		Negative		Negative		Negative		Negative
male	sputum	8year6month	pneumonia	Respiratory bacterial nucleic acid six	2023/11/3 16:09:00																					Negative(-)		Negative(-)		Negative(-)		positive(+）	↑	Negative(-)		Negative(-)
male	Throat swab	8year6month	pneumonia	Respiratory pathogens nucleic acid six	2023/11/3 16:09:00									Negative		Negative		Negative		Negative		Negative		positive	↑
female	Throat swab	1year1month	pneumonia	Respiratory pathogens nucleic acid six	2023/11/3 16:30:00									Negative		Negative		Negative		Negative		positive	↑	Negative
female	Throat swab	2year6month	pneumonia	Respiratory pathogens nucleic acid six	2023/11/3 16:54:00									Negative		Negative		Negative		Negative		Negative		positive	↑
male	Throat swab	1year	Acute bronchitis	Respiratory pathogens nucleic acid six	2023/11/3 17:15:00									Negative		Negative		positive	↑	Negative		Negative		Negative
male	Throat swab	7year4month	pneumoniapneumonia	Respiratory pathogens nucleic acid six	2023/11/3 17:30:00									Negative		Negative		Negative		Negative		positive	↑	positive	↑
female	Throat swab	6year8month	pneumoniapneumonia	Respiratory pathogens nucleic acid six	2023/11/3 18:16:00									Negative		Negative		Negative		Negative		Negative		positive	↑
male	Throat swab	3year7month	severe casepneumonia	Respiratory pathogens nucleic acid six	2023/11/3 18:58:00									Negative		Negative		Negative		Negative		positive	↑	Negative
male	sputum	1year3month	pneumonia	Respiratory bacterial nucleic acid six	2023/11/3 19:45:00																					Negative(-)		Negative(-)		Negative(-)		Negative(-)		Negative(-)		positive(+）	↑
male	Throat swab	1year3month	pneumonia	Respiratory pathogens nucleic acid six	2023/11/3 19:45:00									Negative		Negative		Negative		Negative		Negative		positive	↑
male	sputum	1year5month	pneumonia	Respiratory bacterial nucleic acid six	2023/11/3 19:50:00																					Negative(-)		Negative(-)		Negative(-)		positive(+）	↑	Negative(-)		Negative(-)
male	Throat swab	1year5month	pneumonia	Respiratory pathogens nucleic acid six	2023/11/3 19:50:00									Negative		Negative		Negative		Negative		Negative		Negative
male	Throat swab	5month9day	pneumonia	Respiratory pathogens nucleic acid six	2023/11/3 2:47:00									Negative		Negative		Negative		Negative		Negative		Negative
female	sputum	2year	pneumonia	Respiratory bacterial nucleic acid six	2023/11/3 21:00:00																					Negative(-)		Negative(-)		Negative(-)		Negative(-)		Negative(-)		positive(+）	↑
female	Throat swab	2year	Unexplained convulsion	Respiratory pathogens nucleic acid six	2023/11/3 21:00:00									Negative		Negative		positive	↑	Negative		Negative		Negative
female	Throat swab	8year6month	Acute bronchitis	Respiratory pathogens nucleic acid six	2023/11/3 21:05:00									Negative		Negative		Negative		Negative		Negative		positive	↑
male	Throat swab	1year6month	Acute upper respiratory tract infection	Respiratory pathogens nucleic acid six	2023/11/3 21:42:00									Negative		Negative		Negative		Negative		Negative		Negative
female	Throat swab	6year11month	Acute bronchitis	Respiratory pathogens nucleic acid six	2023/11/3 21:58:00									positive	↑	Negative		Negative		Negative		Negative		Negative
male	sputum	2year9month	Acute bronchitis	Respiratory bacterial nucleic acid six	2023/11/3 23:06:00																					Negative(-)		Negative(-)		Negative(-)		positive(+）	↑	Negative(-)		Negative(-)
male	Throat swab	2year9month	Acute bronchitis	Respiratory pathogens nucleic acid six	2023/11/3 23:06:00									Negative		Negative		positive	↑	Negative		Negative		Negative
female	Throat swab	6year4month	Acute bronchitis	Respiratory pathogens nucleic acid six	2023/11/3 23:16:00									positive	↑	Negative		Negative		Negative		positive	↑	Negative
female	Throat swab	8month21day	acuteAsthmatic bronchus	Respiratory pathogens nucleic acid six	2023/11/3 9:59:00									Negative		Negative		Negative		Negative		positive	↑	Negative
male	Throat swab	2year6month	Unexplained convulsion	Respiratory pathogens nucleic acid six	2023/11/30 0:00:00									Negative		Negative		Negative		Negative		positive(+）	↑	Negative
female	Throat swab	10year4month	Acute bronchitis	Respiratory pathogens nucleic acid six	2023/11/30 0:27:00								620502201307030447	Negative(-)		Negative(-)		Negative(-)		positive(+）	↑	Negative(-)		Negative(-)
female	Throat swab	10year1month	Acute upper respiratory tract infection	Respiratory pathogens nucleic acid six	2023/11/30 10:30:00								620502201310260729	Negative(-)		positive(+）	↑	Negative(-)		Negative(-)		Negative(-)		positive(+)	↑
male	Throat swab	12year	pneumonia	Respiratory pathogens nucleic acid six	2023/11/30 11:48:00									Negative		Negative		Negative		Negative		Negative		Negative
male	Throat swab	3year5month	fever	Respiratory pathogens nucleic acid six	2023/11/30 11:57:00									Negative		Negative		Negative		Negative		Negative		Negative
male	Throat swab	5year1month	Acute bronchitis	Respiratory pathogens nucleic acid six	2023/11/30 12:40:00									Negative		Negative		Negative		Negative		Negative		Negative
male	Throat swab	7year3month	Acute bronchitis	Respiratory pathogens nucleic acid six	2023/11/30 12:52:00									Negative(-)		Negative(-)		Negative(-)		positive(+）	↑	Negative(-)		Negative(-)
male	Throat swab	5year9month	Acute bronchitis	Respiratory pathogens nucleic acid six	2023/11/30 15:19:00								620521201802133717	Negative		Negative		Negative		Negative		Negative		Negative
male	Throat swab	4year	Acute bronchitis	Respiratory pathogens nucleic acid six	2023/11/30 15:53:00									positive	↑	Negative		Negative		Negative		Negative		Negative
male	Throat swab	5year2month	Acute bronchitis	Respiratory pathogens nucleic acid six	2023/11/30 15:54:00								620502201809280411	positive	↑	Negative		Negative		Negative		Negative		Negative
male	Throat swab	3month3day	bronchuspneumonia	Respiratory pathogens nucleic acid six	2023/11/30 15:56:00									Negative		Negative		positive	↑	Negative		Negative		Negative
male	Throat swab	12year	pneumonia	Respiratory pathogens nucleic acid six	2023/11/30 15:58:00									Negative		Negative		Negative		Negative		Negative		Negative
male	Throat swab	2month1day	Acute bronchitis	Respiratory pathogens nucleic acid six	2023/11/30 16:06:00									Negative		Negative		Negative		Negative		positive	↑	Negative
female	Throat swab	9month18day	bronchus	Respiratory pathogens nucleic acid six	2023/11/30 16:11:00									positive	↑	Negative		Negative		Negative		Negative		Negative
female	Throat swab	2month12day	bronchuspneumonia	Respiratory pathogens nucleic acid six	2023/11/30 16:18:00									positive	↑	Negative		Negative		Negative		Negative		Negative
female	Throat swab	4year8month	Routine health checks for children	Respiratory pathogens nucleic acid six	2023/11/30 16:30:00									Negative		Negative		Negative		Negative		Negative		Negative
male	Throat swab	4year6month	fever	Respiratory pathogens nucleic acid six	2023/11/30 17:21:00									positive	↑	Negative		Negative		Negative		Negative		Negative
male	Throat swab	12year	fever	Respiratory pathogens nucleic acid six	2023/11/30 17:24:00								330382201111111757	positive	↑	Negative		Negative		Negative		Negative		Negative
male	Throat swab	4year10month	Acute upper respiratory tract infection	Respiratory pathogens nucleic acid six	2023/11/30 17:35:00								620502201901122037	Negative		Negative		Negative		positive	↑	Negative		Negative
female	Throat swab	3year6month	Acute upper respiratory tract infection	Respiratory pathogens nucleic acid six	2023/11/30 17:41:00								620502202005062026	Negative		Negative		positive	↑	Negative		Negative		Negative
male	Throat swab	7year	Lobarpneumonia	Respiratory pathogens nucleic acid six	2023/11/30 17:46:00									Negative		Negative		Negative		Negative		Negative		positive	↑
female	Throat swab	9year7month	fever	Respiratory pathogens nucleic acid six	2023/11/30 17:46:00									positive	↑	positive	↑	Negative		Negative		Negative		Negative
male	Throat swab	6year3month	pneumonia	Respiratory pathogens nucleic acid six	2023/11/30 17:53:00									Negative		Negative		Negative		positive	↑	Negative		positive	↑
male	Throat swab	3month3day	severe casepneumonia	Respiratory pathogens nucleic acid six	2023/11/30 18:22:00									Negative		Negative		Negative		Negative		Negative		Negative
male	Throat swab	2month24day	Asthmatic bronchuspneumonia	Respiratory pathogens nucleic acid six	2023/11/30 18:34:00									Negative		Negative		positive	↑	Negative		Negative		Negative
male	Throat swab	12year	fever	Respiratory pathogens nucleic acid six	2023/11/30 18:48:00									positive	↑	Negative		Negative		Negative		Negative		Negative
female	Throat swab	3year	pneumonia	Respiratory pathogens nucleic acid six	2023/11/30 19:55:00									Negative		Negative		Negative		Negative		Negative		Negative
female	Throat swab	8year9month	Acute upper respiratory tract infection	Respiratory pathogens nucleic acid six	2023/11/30 20:13:00								620502201502032026	Negative		Negative		Negative		positive	↑	Negative		positive	↑
female	Throat swab	5year10month	bronchus	Respiratory pathogens nucleic acid six	2023/11/30 20:14:00									Negative		positive	↑	Negative		Negative		Negative		Negative
female	Throat swab	6year5month	fever	Respiratory pathogens nucleic acid six	2023/11/30 20:44:00								620502201706052926	positive	↑	Negative		Negative		positive	↑	Negative		Negative
male	Throat swab	2year8month	Unexplained convulsion	Respiratory pathogens nucleic acid six	2023/11/30 21:29:00									Negative		positive	↑	Negative		Negative		Negative		Negative
male	Throat swab	2year3month	Acute bronchitis	Respiratory pathogens nucleic acid six	2023/11/30 21:59:00									Negative		Negative		Negative		Negative		Negative		Negative
female	Throat swab	10year11month	Acute bronchitis	Respiratory pathogens nucleic acid six	2023/11/30 22:21:00									Negative		positive	↑	Negative		Negative		Negative		Negative
male	Throat swab	11year4month	Acute bronchitis	Respiratory pathogens nucleic acid six	2023/11/30 22:29:00									Negative		positive	↑	Negative		Negative		Negative		positive	↑
male	Throat swab	12year	Acute bronchitis	Respiratory pathogens nucleic acid six	2023/11/30 22:56:00									Negative		positive	↑	Negative		Negative		Negative		Negative
female	Throat swab	6year2month	Acute bronchitis	Respiratory pathogens nucleic acid six	2023/11/30 23:09:00									Negative		positive	↑	Negative		Negative		Negative		Negative
female	Throat swab	1year6month	Acute upper respiratory tract infection	Respiratory pathogens nucleic acid six	2023/11/30 23:26:00									Negative		Negative		Negative		Negative		Negative		Negative
male	Throat swab	1year4month	Acute laryngotracheitis	Respiratory pathogens nucleic acid six	2023/11/30 4:41:00									Negative		positive	↑	Negative		Negative		Negative		Negative
female	Throat swab	3year	Acute bronchitis	Respiratory pathogens nucleic acid six	2023/11/30 7:32:00								620502202011242920	positive	↑	Negative		Negative		Negative		positive	↑	Negative
female	Throat swab	5year1month	bronchuspneumonia	Respiratory pathogens nucleic acid six	2023/11/30 7:56:00									positive(+）	↑	Negative(-)		Negative(-)		Negative(-)		Negative(-)		Negative(-)
female	Throat swab	7year4month	fever	Respiratory pathogens nucleic acid six	2023/11/30 8:43:00								620502201607191621	Negative		positive	↑	Negative		Negative		Negative		Negative
female	Throat swab	11year6month	Lobarpneumonia	Respiratory pathogens nucleic acid six	2023/11/30 9:28:00									Negative(-)		Negative(-)		positive(+）	↑	Negative(-)		Negative(-)		positive(+)	↑
male	Throat swab	2year8month	Acute bronchitis	Respiratory pathogens nucleic acid six	2023/11/30 9:57:00									Negative(-)		Negative(-)		positive(+）	↑	Negative(-)		Negative(-)		Negative(-)
female	Throat swab	10year6month	Acute bronchitis	Respiratory pathogens nucleic acid six	2023/11/30 9:59:00								620502201305112924	positive(+）	↑	Negative(-)		Negative(-)		positive(+）	↑	Negative(-)		Negative(-)
male	Throat swab	5year3month	Acute upper respiratory tract infection	Respiratory pathogens nucleic acid six	2023/11/4 10:45:00									Negative		Negative		Negative		Negative		Negative		Negative
female	sputum	10year2month	pneumonia	Respiratory bacterial nucleic acid six	2023/11/4 11:04:00																					Negative(-)		Negative(-)		Negative(-)		Negative(-)		Negative(-)		Negative(-)
female	Throat swab	10year2month	pneumonia	Respiratory pathogens nucleic acid six	2023/11/4 11:04:00									Negative		Negative		Negative		Negative		Negative		positive	↑
female	Throat swab	2month23day	pneumonia	Respiratory pathogens nucleic acid six	2023/11/4 11:11:00									Negative		Negative		positive	↑	Negative		Negative		Negative
male	sputum	8year6month	pneumonia	Respiratory bacterial nucleic acid six	2023/11/4 11:44:00																					Negative(-)		Negative(-)		Negative(-)		Negative(-)		Negative(-)		positive(+）	↑
male	Throat swab	8year6month	pneumonia	Respiratory pathogens nucleic acid six	2023/11/4 11:44:00									Negative		Negative		Negative		Negative		Negative		positive	↑
female	Throat swab	3year6month	pneumonia	Respiratory pathogens nucleic acid six	2023/11/4 11:48:00									Negative		Negative		positive	↑	Negative		Negative		Negative
female	sputum	7year	pneumonia	Respiratory bacterial nucleic acid six	2023/11/4 11:53:00																					Negative(-)		Negative(-)		Negative(-)		positive(+）	↑	Negative(-)		positive(+）	↑
female	Throat swab	7year	pneumonia	Respiratory pathogens nucleic acid six	2023/11/4 11:53:00									Negative		Negative		Negative		Negative		Negative		positive(+)	↑
male	Throat swab	2year3month	Acute laryngitis	Respiratory pathogens nucleic acid six	2023/11/4 11:58:00									Negative		Negative		Negative		Negative		Negative		Negative
male	Throat swab	8year1month	Lobarpneumonia	Respiratory pathogens nucleic acid six	2023/11/4 12:49:00									Negative		Negative		Negative		Negative		Negative		Negative
female	Throat swab	5month9day	acuteAsthmatic bronchus	Respiratory pathogens nucleic acid six	2023/11/4 14:38:00									Negative		Negative		Negative		Negative		Negative		Negative
female	sputum	5month10day	pneumonia	Respiratory bacterial nucleic acid six	2023/11/4 14:38:00																					Negative(-)		Negative(-)		Negative(-)		Negative(-)		Negative(-)		positive(+）	↑
female	sputum	1year2month	Acute bronchitis	Respiratory bacterial nucleic acid six	2023/11/4 15:34:00																					Negative(-)		Negative(-)		Negative(-)		positive(+）	↑	Negative(-)		positive(+）	↑
female	Throat swab	1year2month	Acute bronchitis	Respiratory pathogens nucleic acid six	2023/11/4 15:34:00									Negative		Negative		Negative		Negative		Negative		Negative
male	Throat swab	3year11month	fever	Respiratory pathogens nucleic acid six	2023/11/4 15:43:00									Negative		Negative		Negative		Negative		Negative		Negative
male	Throat swab	6year8month	Acute bronchitis	Respiratory pathogens nucleic acid six	2023/11/4 15:48:00									positive	↑	Negative		positive	↑	Negative		Negative		Negative
female	Throat swab	7year7month	pneumonia	Respiratory pathogens nucleic acid six	2023/11/4 17:44:00									Negative		Negative		Negative		positive	↑	Negative		positive	↑
female	Throat swab	9year10month	pneumonia	Respiratory pathogens nucleic acid six	2023/11/4 17:58:00									Negative		Negative		positive	↑	Negative		Negative		positive	↑
male	sputum	4month26day	pneumonia	Respiratory bacterial nucleic acid six	2023/11/4 19:45:00																					Negative(-)		Negative(-)		Negative(-)		positive(+）	↑	Negative(-)		positive(+）	↑
male	Throat swab	4month25day	pneumonia	Respiratory pathogens nucleic acid six	2023/11/4 19:45:00									Negative		Negative		Negative		Negative		Negative		Negative
male	Throat swab	7month26day	pneumonia	Respiratory pathogens nucleic acid six	2023/11/4 2:16:00									Negative		Negative		Negative		positive	↑	Negative		Negative
male	Throat swab	10year2month	pneumonia	Respiratory pathogens nucleic acid six	2023/11/4 20:35:00									Negative		positive	↑	Negative		Negative		positive	↑	Negative
male	sputum	8year10month	Acute laryngotracheitis	Respiratory bacterial nucleic acid six	2023/11/4 4:22:00																					Negative(-)		Negative(-)		positive(+）	↑	positive(+）	↑	Negative(-)		positive(+）	↑
male	Throat swab	8year10month	Acute laryngotracheitis	Respiratory pathogens nucleic acid six	2023/11/4 4:22:00									Negative		Negative		Negative		Negative		Negative		Negative
male	sputum	6month15day	Asthmatic bronchuspneumonia	Respiratory bacterial nucleic acid six	2023/11/4 5:47:00																					Negative(-)		Negative(-)		Negative(-)		positive(+）	↑	Negative(-)		Negative(-)
male	Throat swab	6month15day	Asthmatic bronchuspneumonia	Respiratory pathogens nucleic acid six	2023/11/4 5:47:00									Negative		Negative		positive	↑	Negative		Negative		Negative
male	Throat swab	1year4month	Asthmatic bronchuspneumonia	Respiratory pathogens nucleic acid six	2023/11/4 7:45:00									Negative		Negative		positive	↑	Negative		positive	↑	Negative
male	sputum	11day13hour	congenitalpneumonia	Respiratory bacterial nucleic acid six	2023/11/4 9:52:00																					Negative(-)		Negative(-)		Negative(-)		Negative(-)		Negative(-)		Negative(-)
male	Throat swab	11day13hour	congenitalpneumonia	Respiratory pathogens nucleic acid six	2023/11/4 9:52:00									Negative		Negative		Negative		Negative		Negative		Negative
male	sputum	4year6month	Acute upper respiratory tract infection	Respiratory bacterial nucleic acid six	2023/11/5 0:27:00																					Negative(-)		Negative(-)		Negative(-)		positive(+）	↑	Negative(-)		positive(+）	↑
male	Throat swab	4year6month	Acute upper respiratory tract infection	Respiratory pathogens nucleic acid six	2023/11/5 0:27:00									positive	↑	Negative		Negative		Negative		Negative		Negative
male	Throat swab	10month21day	Acute bronchitis	Respiratory pathogens nucleic acid six	2023/11/5 0:42:00									Negative		Negative		Negative		positive	↑	Negative		Negative
male	Throat swab	6month21day	pneumonia	Respiratory pathogens nucleic acid six	2023/11/5 11:27:00									Negative		Negative		positive	↑	Negative		Negative		Negative
male	sputum	9year5month	Acute bronchitis	Respiratory bacterial nucleic acid six	2023/11/5 11:28:00																					Negative(-)		Negative(-)		Negative(-)		positive(+）	↑	Negative(-)		positive(+）	↑
male	Throat swab	9year5month	Acute bronchitis	Respiratory pathogens nucleic acid six	2023/11/5 11:28:00									Negative		Negative		positive	↑	Negative		Negative		positive	↑
female	Throat swab	4year7month	Lobarpneumonia	Respiratory pathogens nucleic acid six	2023/11/5 12:34:00									Negative		Negative		Negative		Negative		Negative		positive	↑
male	Throat swab	11month20day	Asthmatic bronchuspneumonia	Respiratory pathogens nucleic acid six	2023/11/5 13:32:00									Negative		Negative		positive	↑	Negative		Negative		Negative
female	Throat swab	2year2month	pneumonia	Respiratory pathogens nucleic acid six	2023/11/5 13:38:00									Negative		Negative		positive	↑	Negative		Negative		positive	↑
male	Throat swab	7month5day	bronchuspneumonia	Respiratory pathogens nucleic acid six	2023/11/5 15:38:00									Negative		Negative		positive	↑	Negative		Negative		Negative
female	Throat swab	7month18day	Asthmatic bronchuspneumonia	Respiratory pathogens nucleic acid six	2023/11/5 16:06:00									Negative		Negative		positive	↑	Negative		Negative		Negative
female	sputum	8year2month	pneumonia	Respiratory bacterial nucleic acid six	2023/11/5 16:08:00																					Negative(-)		Negative(-)		Negative(-)		Negative(-)		Negative(-)		Negative(-)
female	Throat swab	8year2month	pneumonia	Respiratory pathogens nucleic acid six	2023/11/5 16:08:00									Negative		Negative		Negative		Negative		Negative		Negative
female	Throat swab	3year10month	bronchus	Respiratory pathogens nucleic acid six	2023/11/5 16:21:00									Negative		Negative		Negative		Negative		Negative		Negative
male	Throat swab	5month16day	Asthmatic bronchuspneumonia	Respiratory pathogens nucleic acid six	2023/11/5 16:27:00									Negative		Negative		positive	↑	Negative		Negative		Negative
female	Throat swab	7month4day	fever	Respiratory pathogens nucleic acid six	2023/11/5 16:42:00									Negative		Negative		positive	↑	Negative		Negative		Negative
female	sputum	7month4day	pneumonia	Respiratory bacterial nucleic acid six	2023/11/5 16:42:00																					Negative(-)		positive(+）	↑	positive(+）	↑	Negative(-)		Negative(-)		positive(+）	↑
male	sputum	1year3month	Acute bronchitis	Respiratory bacterial nucleic acid six	2023/11/5 16:52:00																					Negative(-)		Negative(-)		Negative(-)		positive(+）	↑	Negative(-)		positive(+）	↑
male	Throat swab	1year3month	Acute bronchitis	Respiratory pathogens nucleic acid six	2023/11/5 16:52:00									Negative		Negative		positive	↑	positive	↑	Negative		Negative
female	sputum	1year3month	Acute bronchitis	Respiratory bacterial nucleic acid six	2023/11/5 18:00:00								620521202208030824													Negative(-)		Negative(-)		positive(+）	↑	Negative(-)		Negative(-)		positive(+）	↑
female	Throat swab	1year3month	Acute bronchitis	Respiratory pathogens nucleic acid six	2023/11/5 18:00:00								620521202208030824	positive	↑	Negative		Negative		Negative		Negative		Negative
male	sputum	7year1month	pneumonia	Respiratory bacterial nucleic acid six	2023/11/5 2:15:00																					Negative(-)		Negative(-)		positive(+）	↑	Negative(-)		Negative(-)		positive(+）	↑
[truncated: 7,671 more rows]

## Sheet: Climatic data
	year	month	Average wind speed 2 minutes	Mean air temperature	Mean relative humidity	Sunshine duration
Tianshui weather station	2023	1	1.2	-1.4	51.1	144.3
Tianshui weather station	2023	2	1.3	3	61.2	77.6
Tianshui weather station	2023	3	1.5	8.8	54.9	170.1
Tianshui weather station	2023	4	1.6	12.9	57.1	172.5
Tianshui weather station	2023	5	1.6	16.9	62.7	151.5
Tianshui weather station	2023	6	1.3	21.2	60.7	206
Tianshui weather station	2023	7	1.4	23.9	63.8	197.1
Tianshui weather station	2023	8	1.6	23.5	65.2	203.3
Tianshui weather station	2023	9	1.3	19.2	73.3	116
Tianshui weather station	2023	10	1.1	11.8	79.3	122.1
Tianshui weather station	2023	11	1.3	5.9	61.3	157.7
Tianshui weather station	2023	12	1.2	-0.6	58.1	162.5
Tianshui weather station	2024	1	1.3	-1	55.8	136.2
Tianshui weather station	2024	2	1.6	0.9	59.1	102.1
Tianshui weather station	2024	3	1.3	8.8	56.4	177.3
