# Supplementary material for: Analysis of epidemic trend of respiratory pathogens in children after long-term pathogen isolation
Source: PeerJ. 2025 Jul 16;13:e19710. doi: 10.7717/peerj.19710 (PMC12275896; doi:10.7717/peerj.19710)
Supplement: Supplemental Information 2 [file peerj-13-19710-s002.xlsx]

## Sheet: Sheet1
ITEM TO CHECK	IMPORTANCE	CHECKLIST
EXPERIMENTAL DESIGN
Definition of experimental and control groups	E	Line 1
Number within each group	E	Line 1
Assay carried out by core lab or investigator's lab?	D
Acknowledgement of authors' contributions	D
SAMPLE
Description	E	Line 4
Volume/mass of sample processed	D
Microdissection or macrodissection	E	Line 6
Processing procedure	E	Line 160
If frozen - how and how quickly?	E	Line 6
If fixed - with what, how quickly?	E	Line 6
Sample storage conditions and duration (especially for FFPE samples)	E	Line 6
NUCLEIC ACID EXTRACTION
Procedure and/or instrumentation	E	Line 152
Name of kit and details of any modifications	E	Line 152
Source of additional reagents used	D	Line 158
Details of DNase or RNAse treatment	E	Line 158
Contamination assessment (DNA or RNA)	E	Line 158
Nucleic acid quantification	E	Line 158
Instrument and method	E	Line 152
Purity (A260/A280)	D	Line 158
Yield	D	Line 158
RNA integrity method/instrument	E	Line 158
RIN/RQI or Cq of 3' and 5' transcripts	E	Line 158
Electrophoresis traces	D	Line 158
Inhibition testing (Cq dilutions, spike or other)	E	Line 158
REVERSE TRANSCRIPTION
Complete reaction conditions	E	Line 138
Amount of RNA and reaction volume	E	Line 178-182
Priming oligonucleotide (if using GSP) and concentration	E	Line 122
Reverse transcriptase and concentration	E	Line 122
Temperature and time	E	Line 43,138
Manufacturer of reagents and catalogue numbers	D	Line 7
Cqs with and without RT	D*
Storage conditions of cDNA	D
qPCR TARGET INFORMATION
If multiplex, efficiency and LOD of each assay.	E	Line 149-151
Sequence accession number	E	Line 185
Location of amplicon	D
Amplicon length	E	Line 185
In silico specificity screen (BLAST, etc)	E	Line 185
Pseudogenes, retropseudogenes or other homologs?	D
Sequence alignment	D
Secondary structure analysis of amplicon	D
Location of each primer by exon or intron (if applicable)	E	Line 185
What splice variants are targeted?	E	Line 185
qPCR OLIGONUCLEOTIDES
Primer sequences	E	Line 185
RTPrimerDB Identification Number	D
Probe sequences	D**
Location and identity of any modifications	E	Line 185
Manufacturer of oligonucleotides	D
Purification method	D
qPCR PROTOCOL
Complete reaction conditions	E	Line 138
Reaction volume and amount of cDNA/DNA	E	Line 179-183
Primer, (probe), Mg++ and dNTP concentrations	E	Line 122
Polymerase identity and concentration	E	Line 122
Buffer/kit identity and manufacturer	E	Line 7
Exact chemical constitution of the buffer	D
Additives (SYBR Green I, DMSO, etc.)	E	Line 122
Manufacturer of plates/tubes and catalog number	D
Complete thermocycling parameters	E	Line 43,138
Reaction setup (manual/robotic)	D
Manufacturer of qPCR instrument	E	Line 156
qPCR VALIDATION
Evidence of optimisation (from gradients)	D
Specificity (gel, sequence, melt, or digest)	E	Line 45-122
For SYBR Green I, Cq of the NTC	E	Line 45-122
Standard curves with slope and y-intercept	E	Line 45-122
PCR efficiency calculated from slope	E	Line 45-122
Confidence interval for PCR efficiency or standard error	D	Line 45-122
r2 of standard curve	E	Line 45-122
Linear dynamic range	E	Line 45-122
Cq variation at lower limit	E	Line 45-122
Confidence intervals throughout range	D	Line 45-122
Evidence for limit of detection	E	Line 45-122
If multiplex, efficiency and LOD of each assay.	E	Line 45-122
DATA ANALYSIS
qPCR analysis program (source, version)	E	Line 139-144
Cq method determination	E	Line 139-144
Outlier identification and disposition	E	Line 139-144
Results of NTCs	E	Line 139-144
Justification of number and choice of reference genes	E	Line 139-144
Description of normalisation method	E	Line 139-144
Number and concordance of biological replicates	D	Line 139-144
Number and stage (RT or qPCR) of technical replicates	E	Line 139-144
Repeatability (intra-assay variation)	E	Line 146-151
Reproducibility (inter-assay variation, %CV)	D	Line 146-151
Power analysis	D
Statistical methods for result significance	E	Line 186
Software (source, version)	E	Line 186
Cq or raw data submission using RDML	D
Table 1. MIQE checklist for authors, reviewers and editors. All essential information (E) must be submitted with the manuscript. Desirable
information (D) should be submitted if available. If using primers obtained from RTPrimerDB, information on qPCR target, oligonucleotides,
protocols and validation is available from that source.
*: Assessing the absence of DNA using a no RT assay is essential when first extracting RNA. Once the sample has been validated as
RDNA-free, inclusion of a no-RT control is desirable, but no longer essential.
**: Disclosure of the probe sequence is highly desirable and strongly encouraged. However, since not all commercial pre-designed assay
vendors provide this information, it cannot be an essential requirement. Use of such assays is advised against.
